# Supplementary material for: Selective dye sorption and metal ion sensing behaviours of a new Cd-based MOF
Source: Royal Society of Chemistry journal article supplement (doi:10.1039/d3nj03179a), 2023-01-01
Supplement: d3nj03179a1.pdf [file d3nj03179a1.pdf]

# Selective Dye Sorption and Metal Ions Sensing Behaviours of a New Cd-based MOF

Priyanka Manna,<sup>a</sup> Avantika Hasija,<sup>b</sup> Deepak Chopra<sup>b</sup> and Partha Mahata<sup>a\*</sup>

<sup>a</sup>Department of Chemistry, Jadavpur University, Kolkata-700032, India. Email: [parthachem@gmail.com](mailto:parthachem@gmail.com)

<sup>b</sup>Crystallography and Crystal Chemistry Laboratory, Department of Chemistry, Indian Institute of Science Education and Research Bhopal, Bhopal By-Pass Road, Bhopal, MP 462066, India

## **ELECTRONIC SUPPLEMENTARY INFORMATION**

\*Corresponding Authors, E-mail: [parthachem@gmail.com](mailto:parthachem@gmail.com)

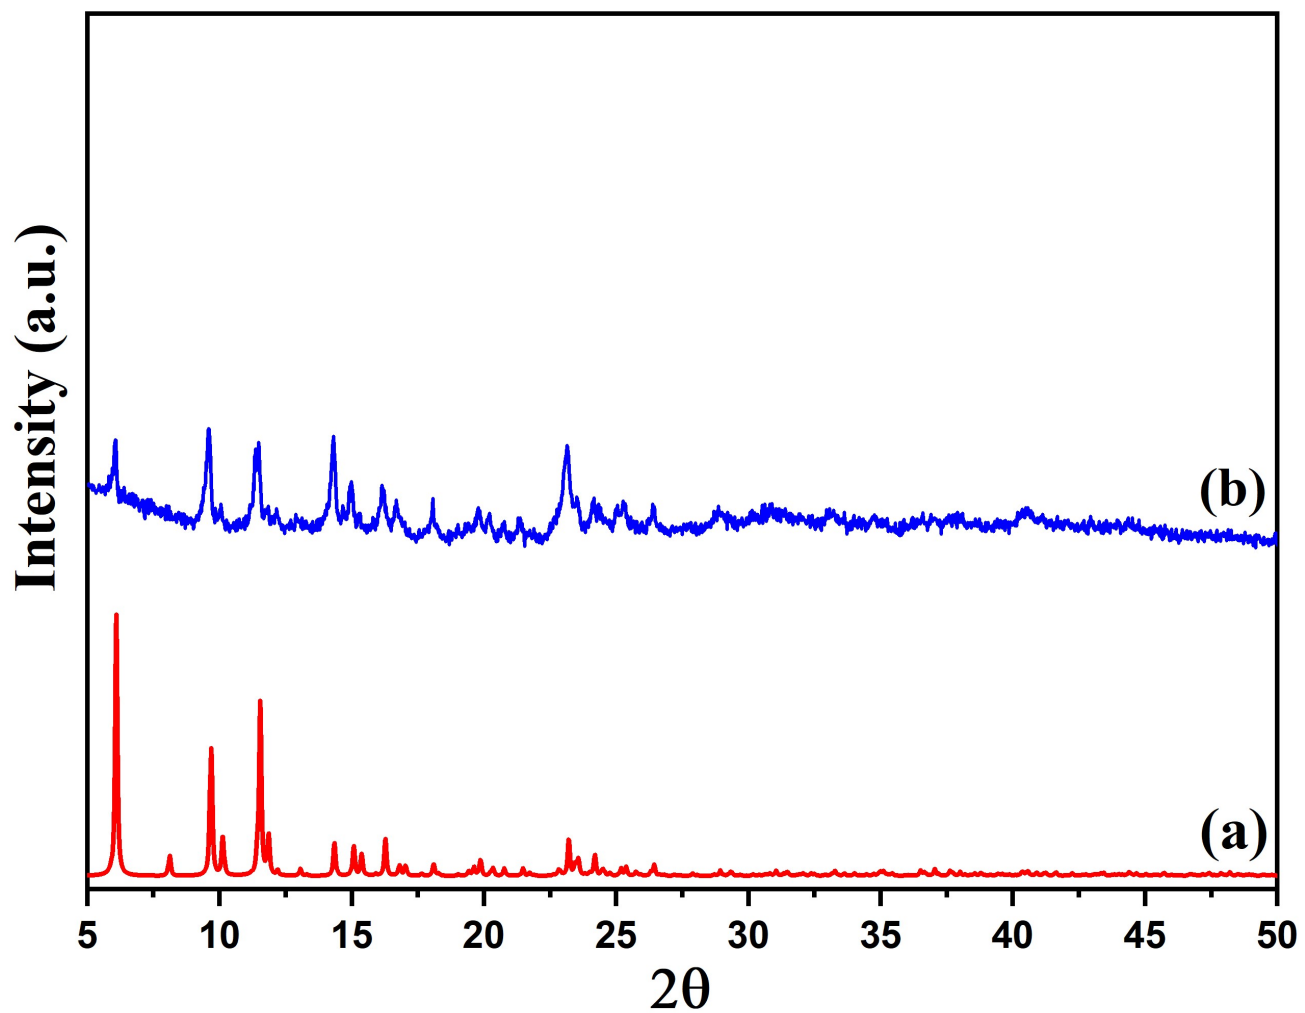

**Fig. S1:** Powder XRD (CuK $\alpha$ ) patterns of [Cd(PDA)(L)<sub>2</sub>], **1**: (a) simulated from single crystal X-ray data, (b) experimental.

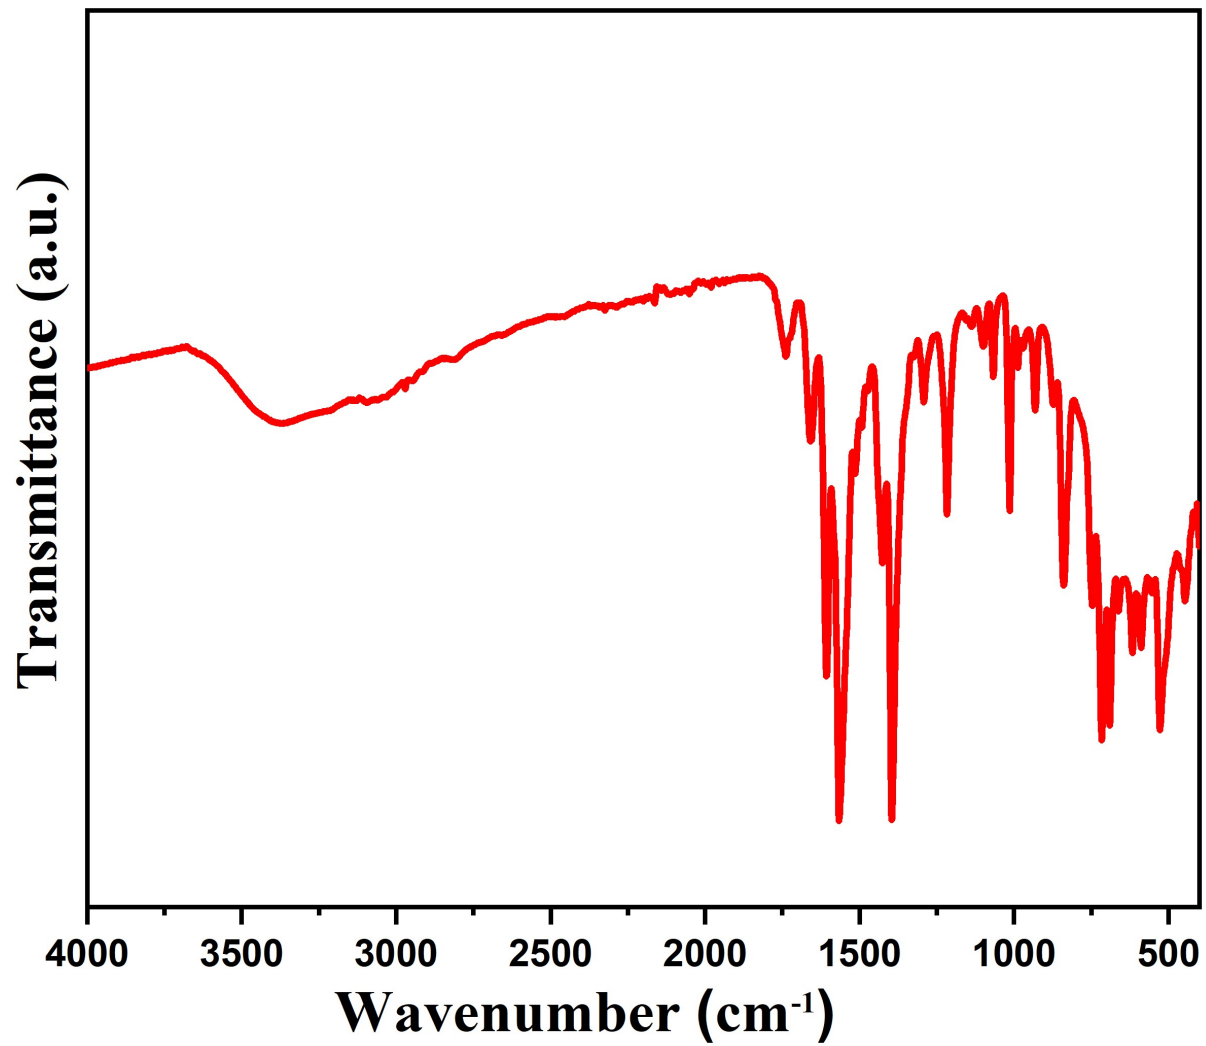

Fig. S2: IR spectrum of  $[\text{Cd}(\text{PDA})(\text{L})_2]$ , 1.

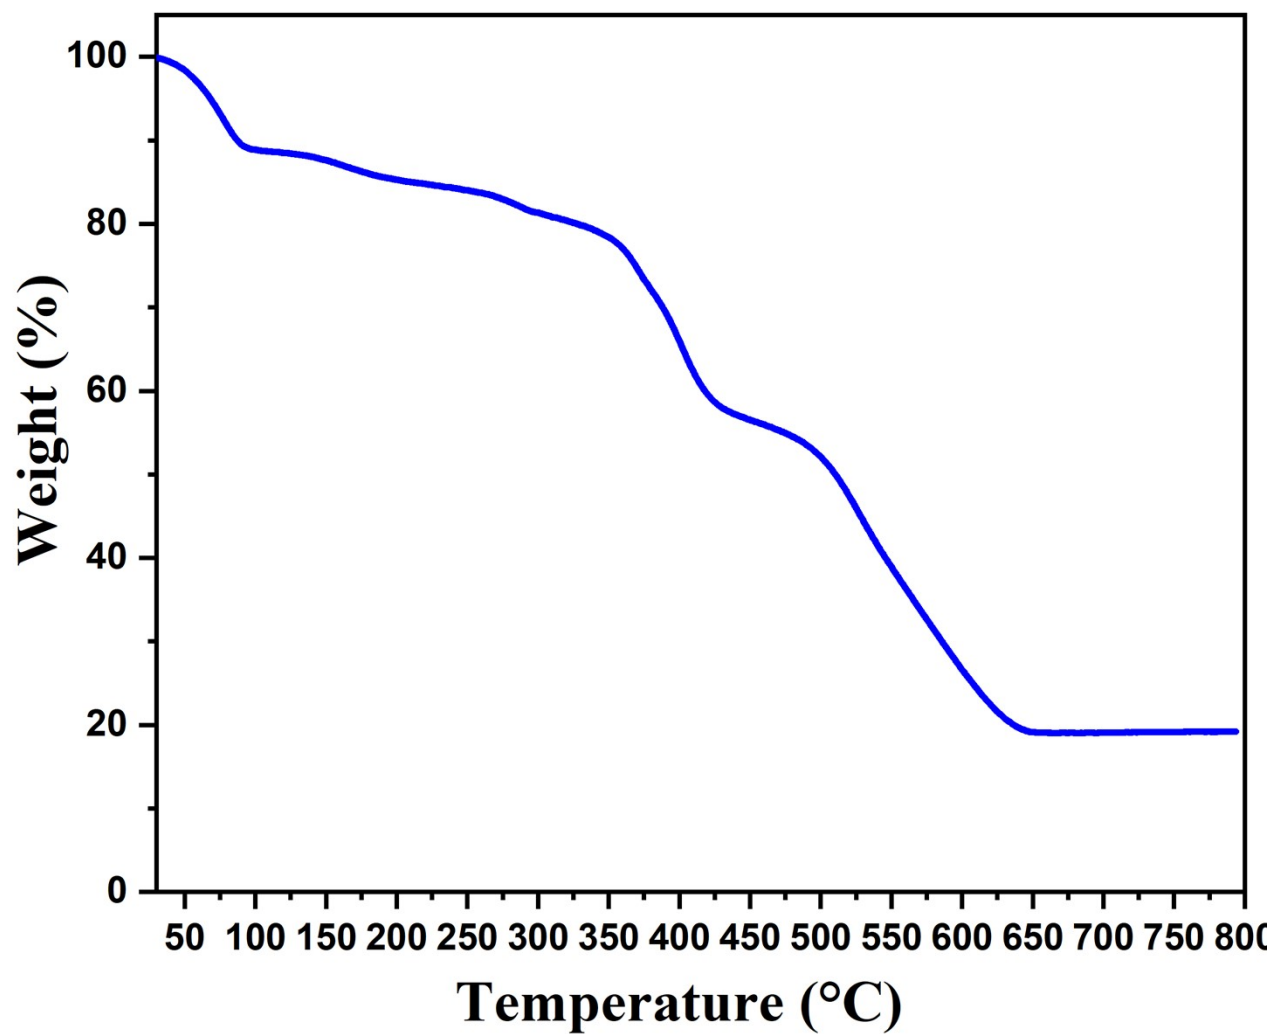

**Fig. S3:** Thermogravimetric analysis (TGA) of [Cd(PDA)(L)<sub>2</sub>], **1**, in nitrogen atmosphere.

**Table S1:** Selected Bond Angles (deg) observed in [Cd(PDA)(L)<sub>2</sub>], **1**.



| Angle                     | Amplitude (°) |
|---------------------------|---------------|
| O (1) –Cd(1)–O(1) # 1     | 83.9 (3)      |
| O (1) –Cd(1)–N(3) # 2     | 91.35 (17)    |
| O (1) # 1 –Cd(1)–N(3) # 2 | 91.36 (17)    |
| O (1) –Cd(1)–N(1)         | 91.57 (16)    |
| O (1) # 1–Cd(1)–N(1)      | 91.57 (16)    |
| N (3) # 2–Cd(1)–N(1)      | 176.1 (2)     |
| O (1) –Cd(1)–N(2)         | 137.93 (13)   |
| O (1) # 1–Cd(1)–N(2)      | 137.93 (13)   |
| N (3) # 2–Cd(1)–N(2)      | 91.3 (3)      |
| N (1) –Cd(1)–N(2)         | 84.7 (2)      |
| O (1) –Cd(1)–O(2)         | 53.85 (17)    |
| O (1) # 1–Cd(1)–O(2)      | 137.72 (18)   |
| N (3) # 2–Cd(1)–O(2)      | 91.91 (13)    |
| N (1) –Cd(1)–O(2)         | 87.70 (13)    |
| N (2) –Cd(1)–O(2)         | 84.10 (11)    |
| O (1) –Cd(1)–O(2) # 1     | 137.72 (17)   |
| O (1) # 1 –Cd(1)–O(2) # 1 | 53.85 (17)    |
| N (3) # 2 –Cd(1)–O(2) # 1 | 91.91 (13)    |
| N (1) –Cd(1)–O(2)         | 87.70 (13)    |
| N (2) –Cd(1)–O(2)         | 84.10 (11)    |
| O (1) –Cd(1)–O(2) # 1     | 137.72 (17)   |
| O (1) # 1 –Cd(1)–O(2) # 1 | 53.85 (17)    |
| N (3) # 2 –Cd(1)–O(2) # 1 | 91.91 (13)    |
| N (1) –Cd(1)–O(2) # 1     | 87.70 (13)    |
| N (2) –Cd(1)–O(2) # 1     | 84.10 (12)    |
| O (2) –Cd(1)–O(2) # 1     | 167.7 (2)     |

Symmetry transformations used to generate equivalent atoms:

For 1: #1 -x+1, y, z; #2 -x+1, -y+1, -z+1.

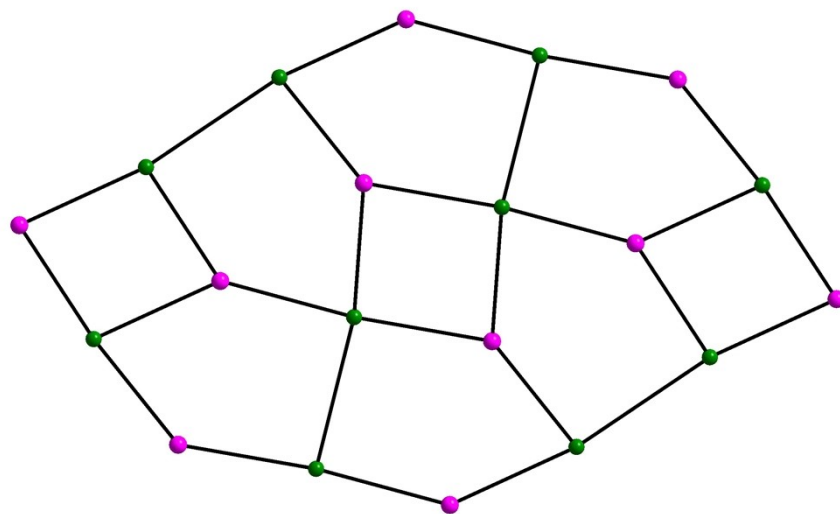

**Fig. S4:** Figure shows the network structure based on 3-connected L ligands and four connected  $\text{Cd}^{2+}$  ions of  $[\text{Cd}(\text{PDA})(\text{L})_2]$ , **1**.

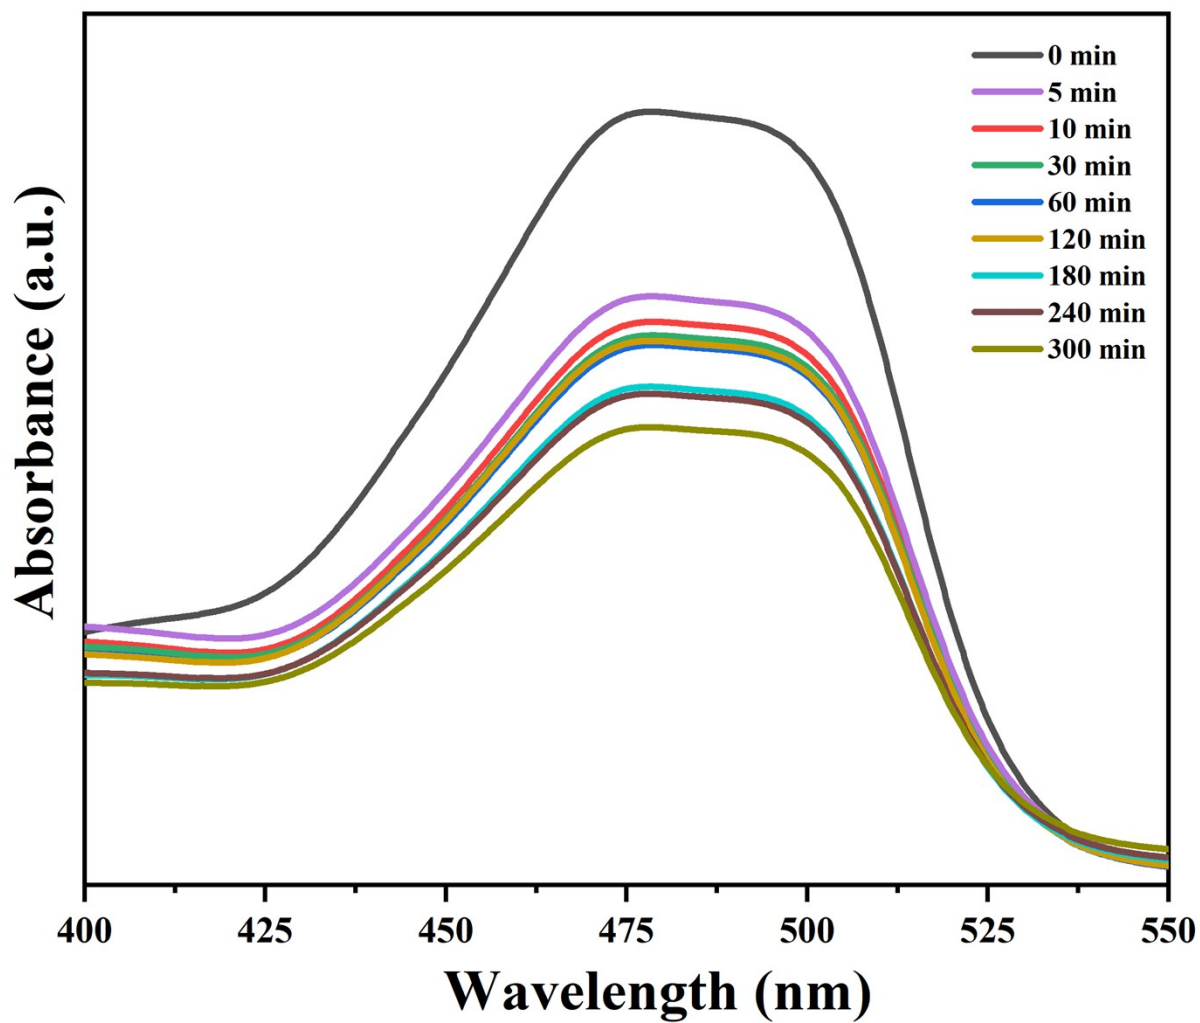

**Fig. S5:** UV-Vis absorption spectra of Orange G (OG) during the time dependent sorption study using compound 1.

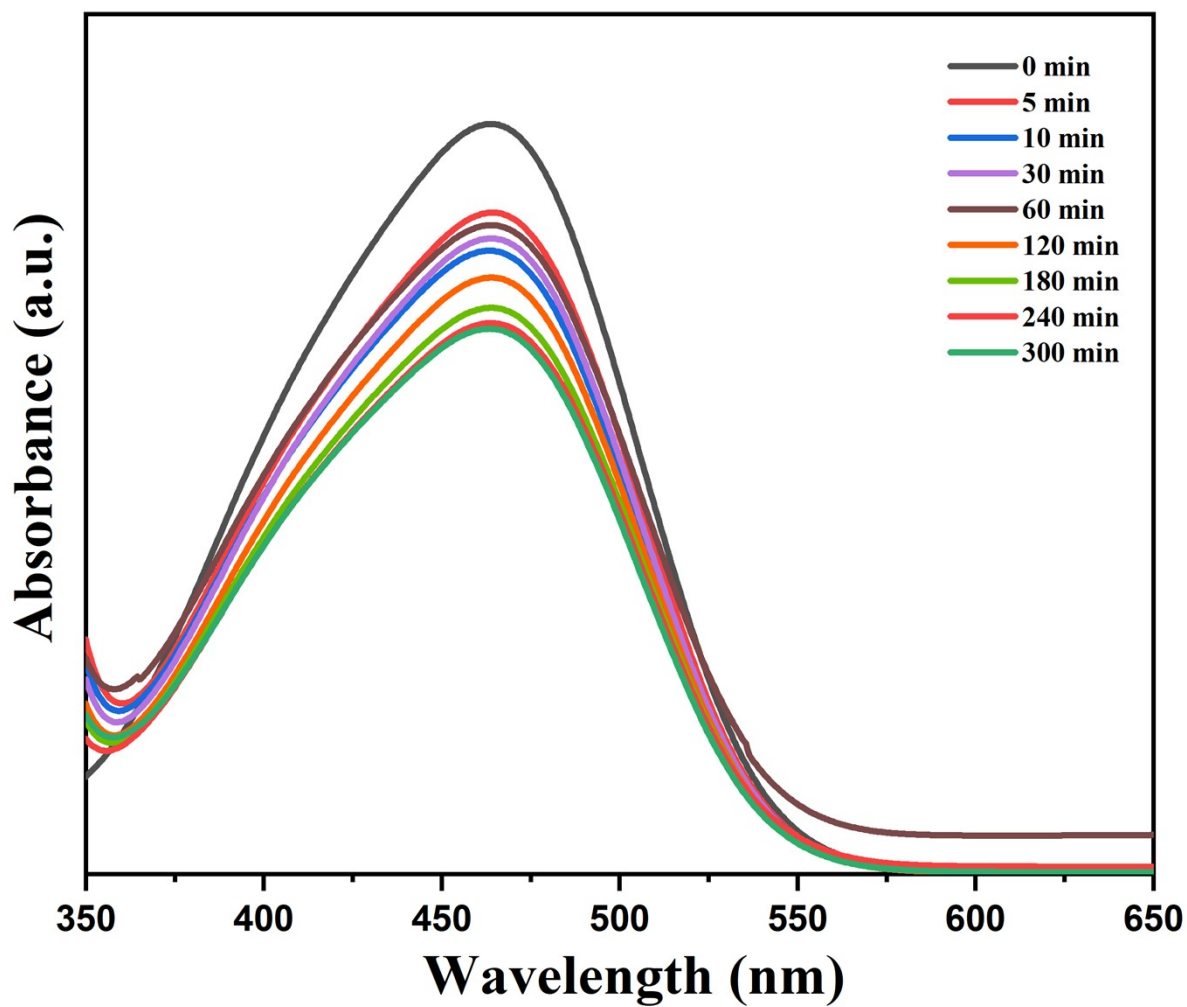

**Fig. S6:** UV-Vis absorption spectra of Methyl Orange (MO) during the time dependent sorption study using compound **1**.

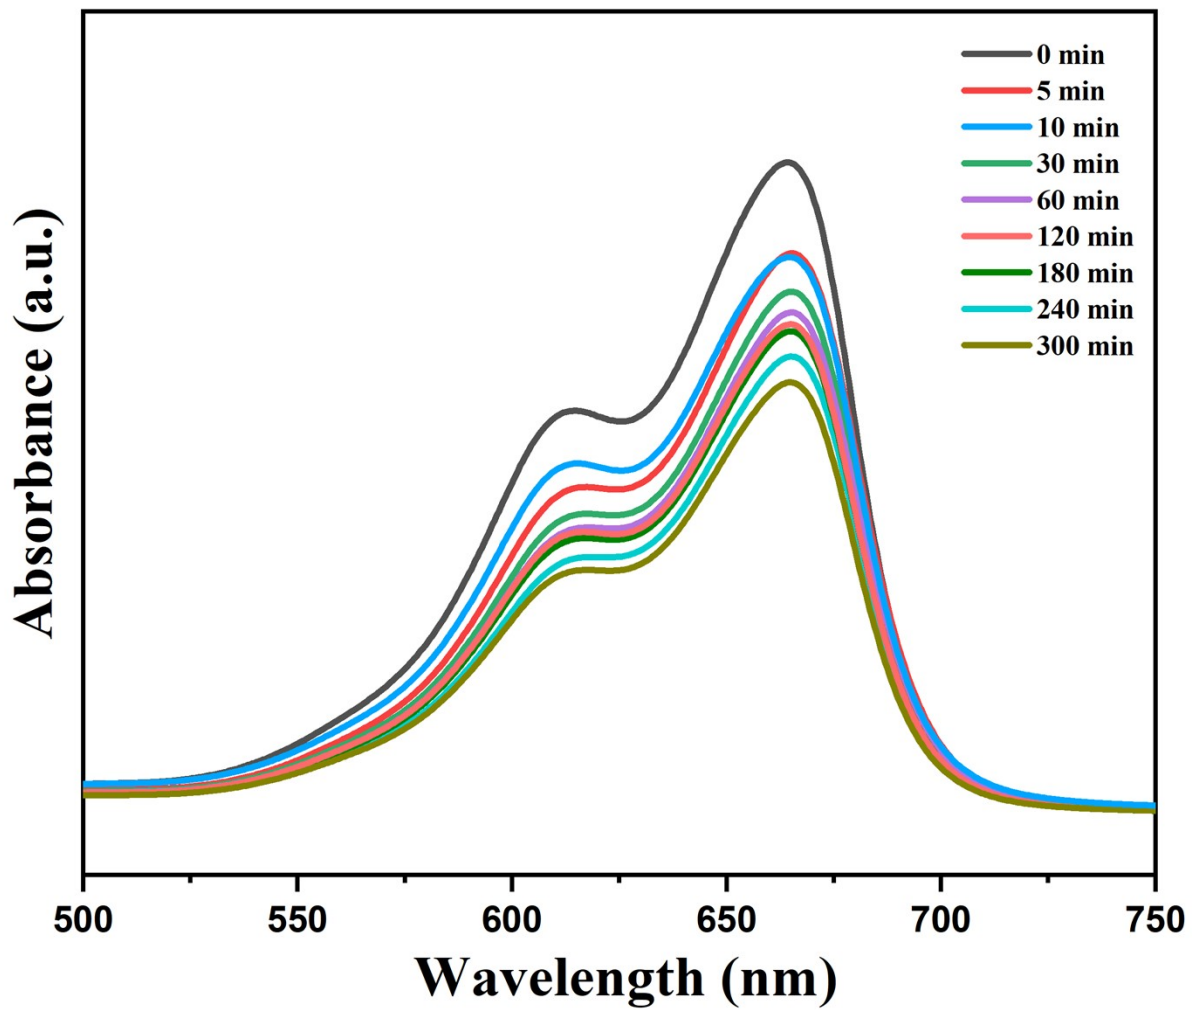

**Fig. S7:** UV-Vis absorption spectra of Methylene Blue (MB) during the time dependent sorption study using compound **1**.

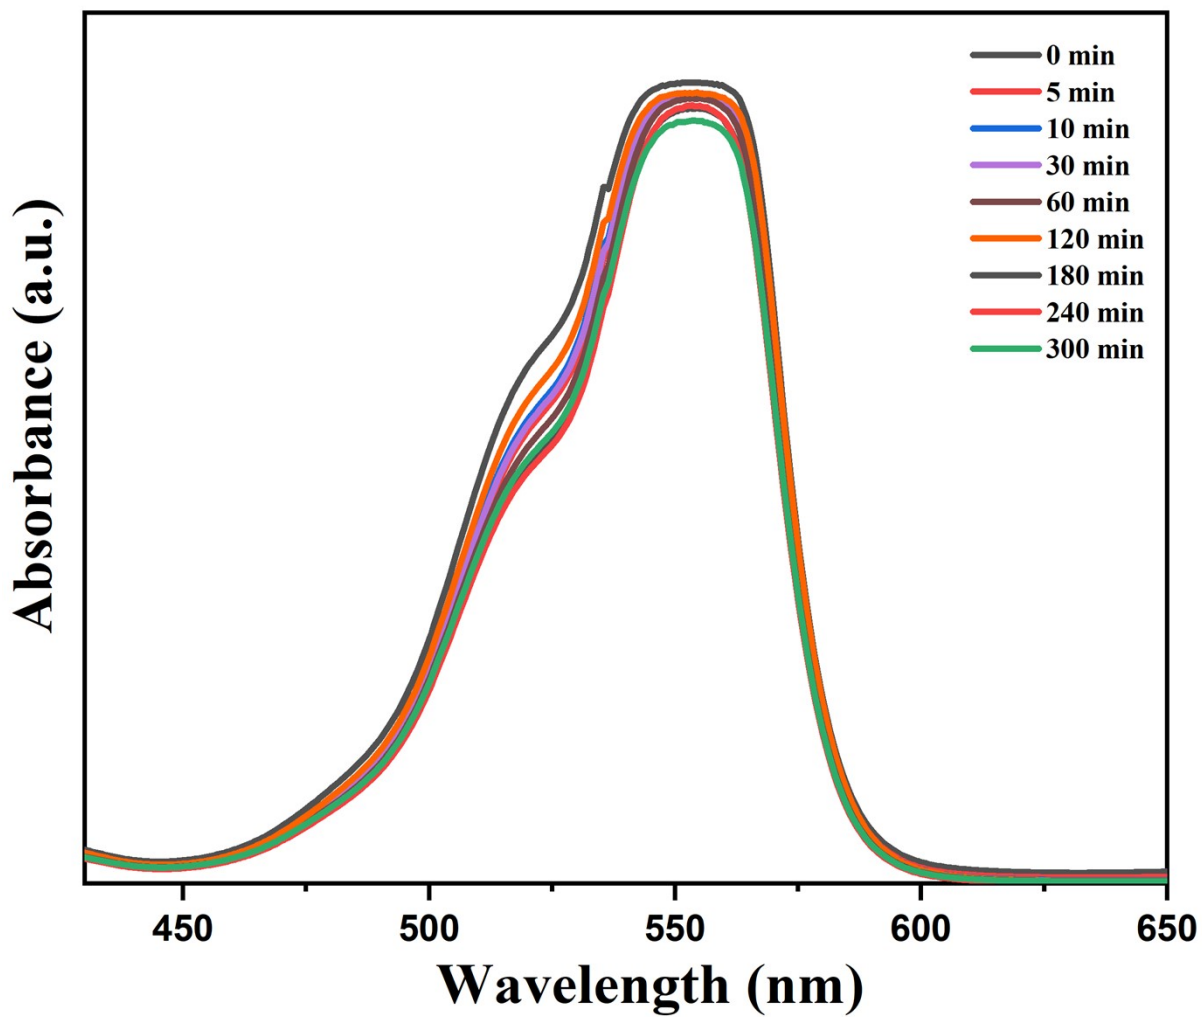

**Fig. S8:** UV-Vis absorption spectra of Rhodamine B (RhB) during the time dependent sorption study using compound **1**.

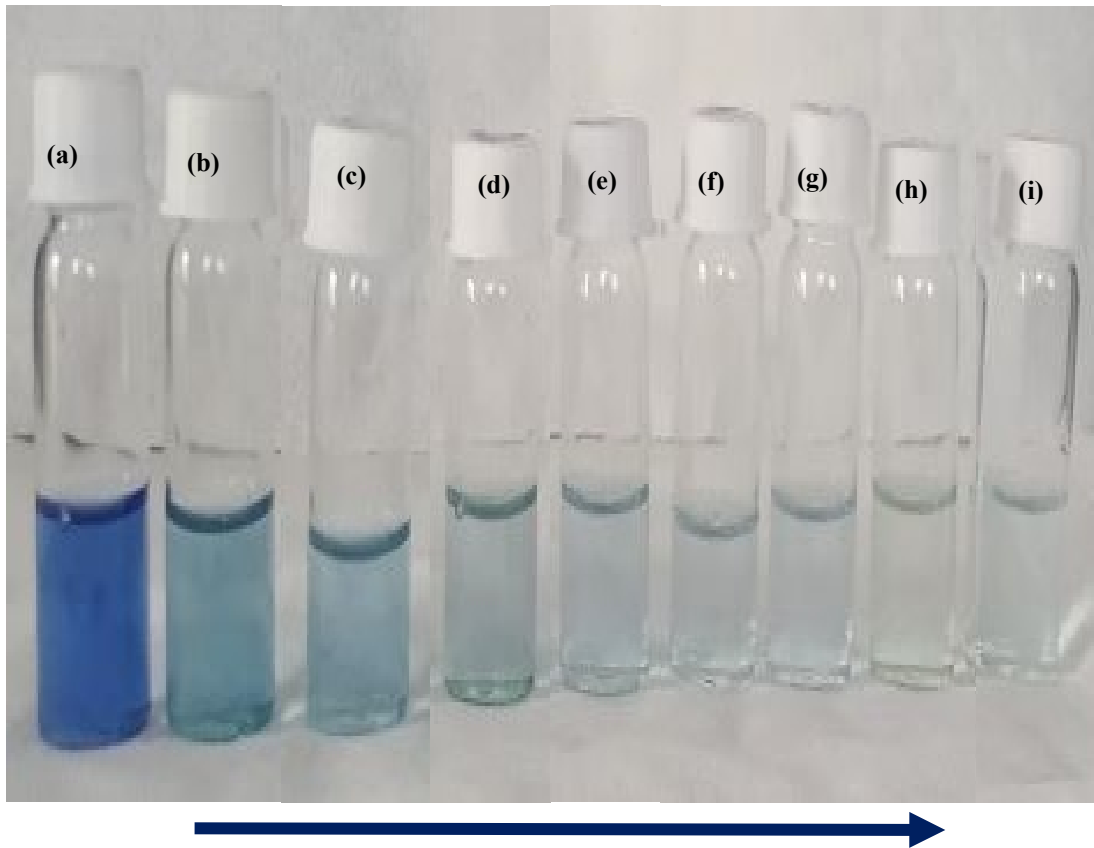

**Fig. S9:** Figure shows the photographs of colour intensity changes of the RBBR during the sorption study: (a) initial solution, (b) after 5 min, (c) after 10 min, (d) after 30 min, (e) after 60 min, (f) after 120 min, (h) after 180 min, (h) after 240 min, (i) after 300 min.

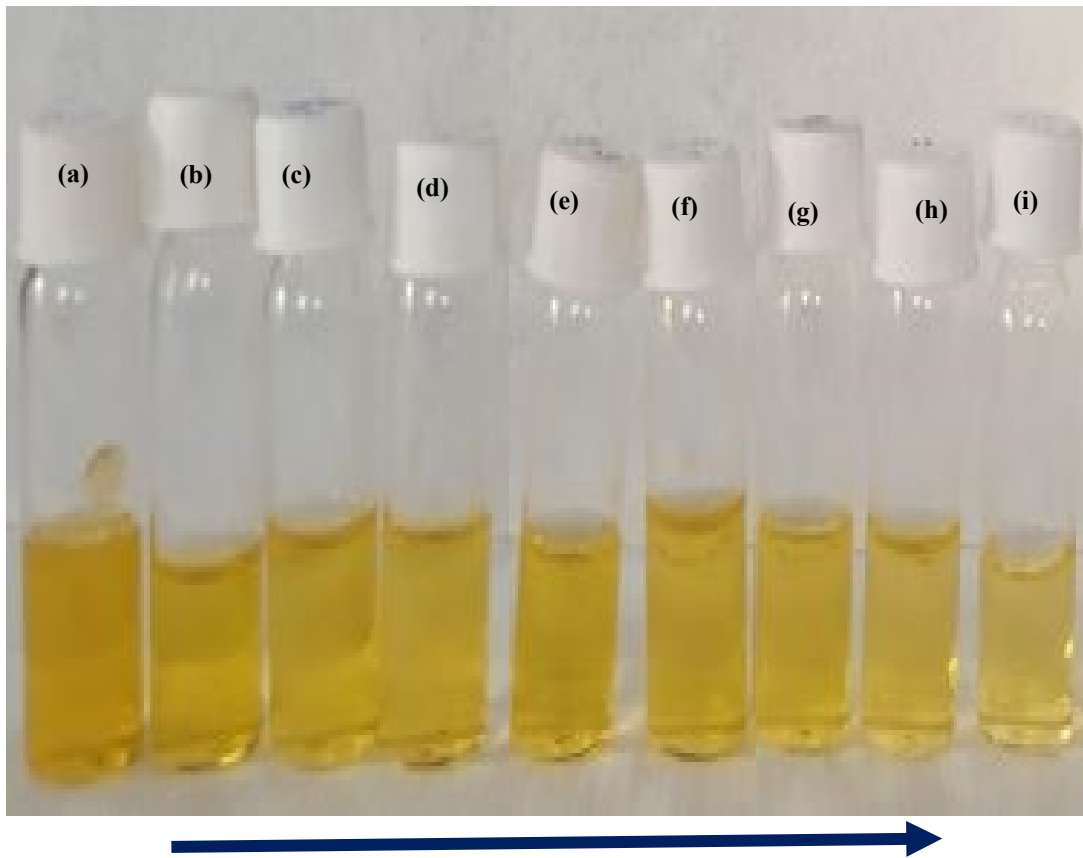

**Fig. S10:** Figure shows the photographs of colour intensity changes of the OG during the sorption study: (a) initial solution, (b) after 5 min, (c) after 10 min, (d) after 30 min, (e) after 60 min, (f) after 120 min, (h) after 180 min, (h) after 240 min, (i) after 300 min.



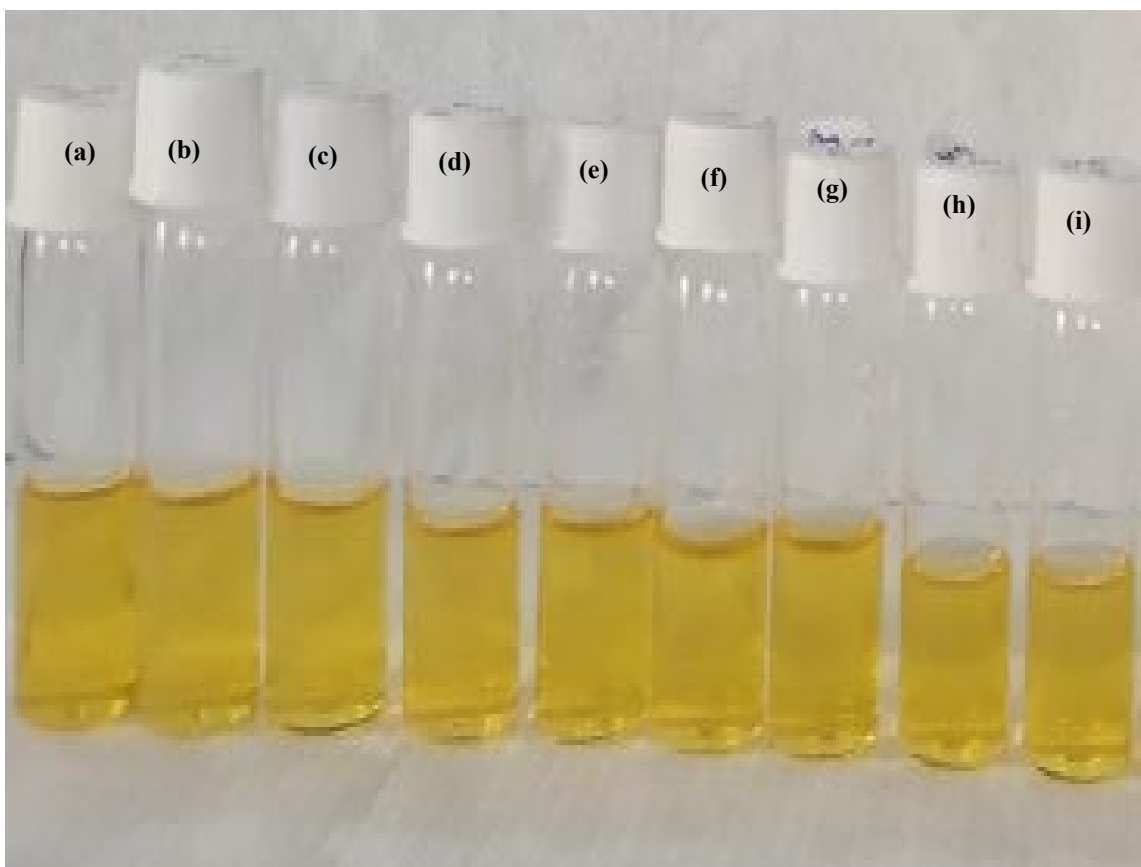

**Fig. S11:** Figure shows the photographs of colour intensity changes of the MO during the sorption study: (a) initial solution, (b) after 5 min, (c) after 10 min, (d) after 30 min, (e) after 60 min, (f) after 120 min, (h) after 180 min, (h) after 240 min, (i) after 300 min.

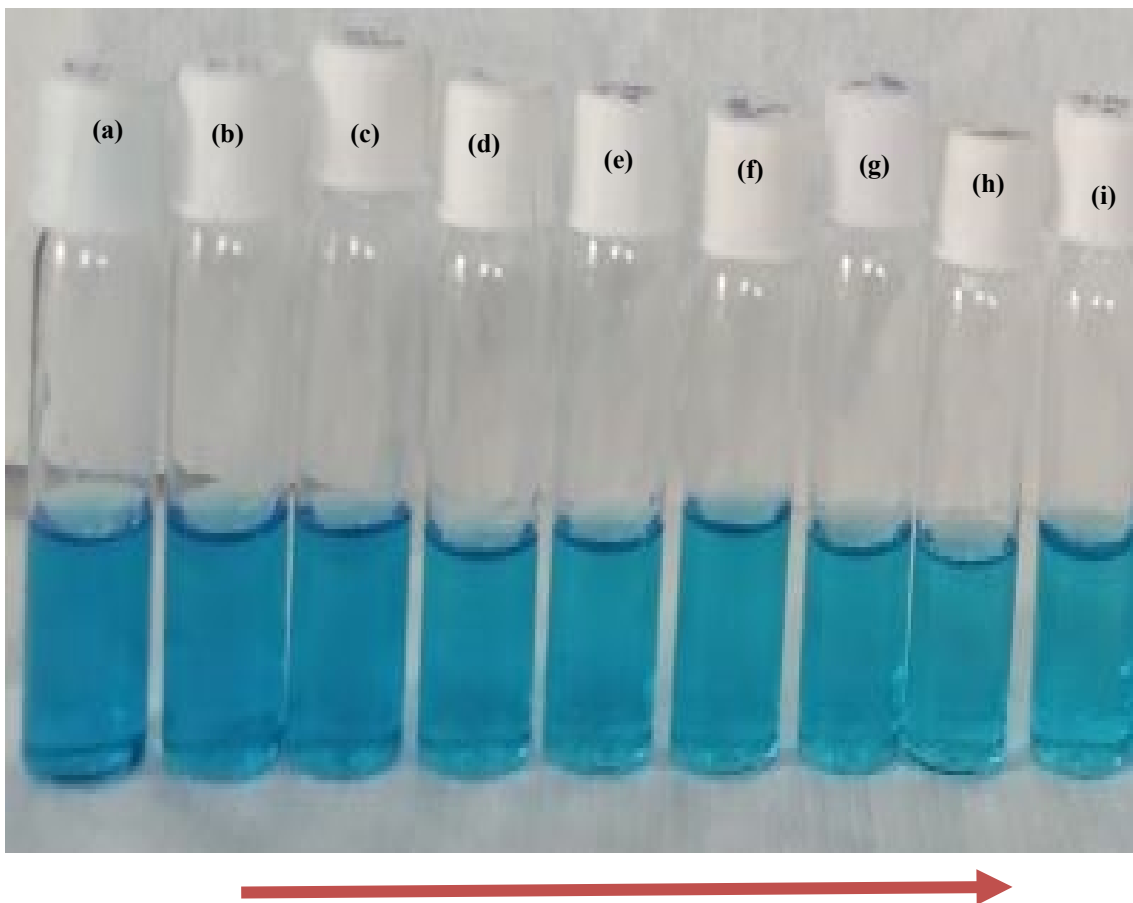

**Fig. S12:** Figure shows the photographs of colour intensity changes of the MB during the sorption study: (a) initial solution, (b) after 5 min, (c) after 10 min, (d) after 30 min, (e) after 60 min, (f) after 120 min, (h) after 180 min, (h) after 240 min, (i) after 300 min.

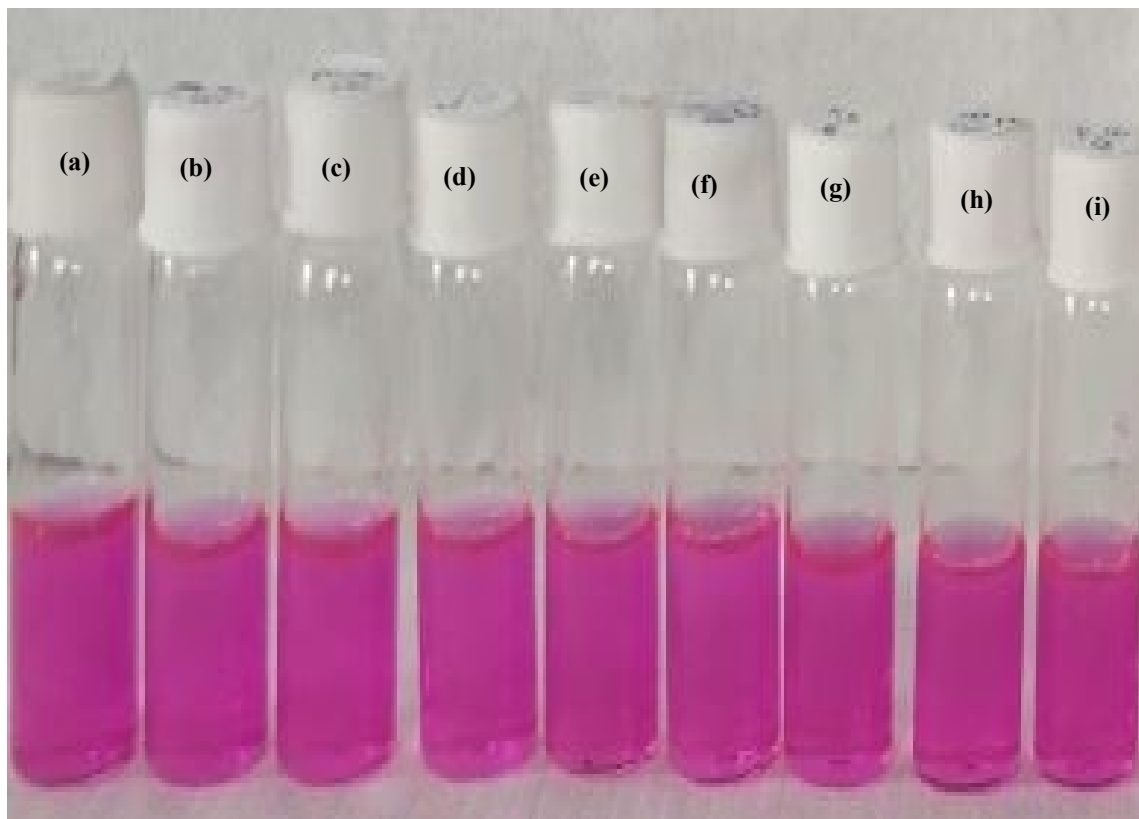

**Fig.**  
**S13:**

Figure shows the photographs of colour intensity changes of the RhB during the sorption study: (a) initial solution, (b) after 5 min, (c) after 10 min, (d) after 30 min, (e) after 60 min, (f) after 120 min, (g) after 180 min, (h) after 240 min, (i) after 300 min.

**Table S2:** Pseudo-second-order kinetic parameters for RBBR dye sorption into  $[\text{Cd}(\text{PDA})(\text{L})_2]$ , 1.

| Adsorbent | $q_e$ (mg g <sup>-1</sup> ) | $K_2$ (h g mg <sup>-1</sup> ) | $R^2$ |
|-----------|-----------------------------|-------------------------------|-------|
| Cd-MOF    | 31.23                       | 0.292                         | 0.998 |
|           | 61.50                       | 0.112                         | 0.996 |
|           | 93.63                       | 0.051                         | 0.995 |
|           | 123.15                      | 0.056                         | 0.997 |
|           | 152.20                      | 0.042                         | 0.997 |

**Table S3:** Parameters of Langmuir model for RBBR dye sorption into [Cd(PDA)(L)<sub>2</sub>], **1**.

| Adsorbent | Dye  | $K_L$ (L mg <sup>-1</sup> ) | $Q_m$ (mg g <sup>-1</sup> ) | $R^2$ |
|-----------|------|-----------------------------|-----------------------------|-------|
| Cd-MOF    | RBBR | 0.071                       | 263.15                      | 1     |

**Table S4:** A Summary of RBBR dye sorption using various materials.

| Materials                                                                                                           | Efficiency (%) | Time        | Ref.      |
|---------------------------------------------------------------------------------------------------------------------|----------------|-------------|-----------|
| NMIL88(Fe)-Lac and HS<br>NMIL88(Fe)-Lac                                                                             | 90.8 and 92.0  | 3 h and 2 h | 79        |
| ZIF-8 and ZIF-67                                                                                                    | 98 and 95      | 2 h         | 80        |
| TiO <sub>2</sub> -ZrO <sub>2</sub> - Laccase and TiO <sub>2</sub> -<br>ZrO <sub>2</sub> -SiO <sub>2</sub> - Laccase | 90 and 76      | 24 h        | 81        |
| Magnetic copper alginate beads                                                                                      | 75.8           | 4 h         | 82        |
| CS-SA/ALG/MTN                                                                                                       | 54.3           | ½ h         | 83        |
| Immobilized laccase                                                                                                 | 64             | 48 h        | 84        |
| PU microspheres                                                                                                     | 64.1           | 6 h         | 85        |
| Trametes maxima IIPLC-32                                                                                            | 92.3           | —           | 86        |
| Amberlyst A21                                                                                                       | 89.23          | 2½ h        | 87        |
| Thuja orientalis (ACTOL)                                                                                            | 82             | 5 h         | 88        |
| [Cd(PDA)(L) <sub>2</sub> ]                                                                                          | 95             | 5 h         | This work |

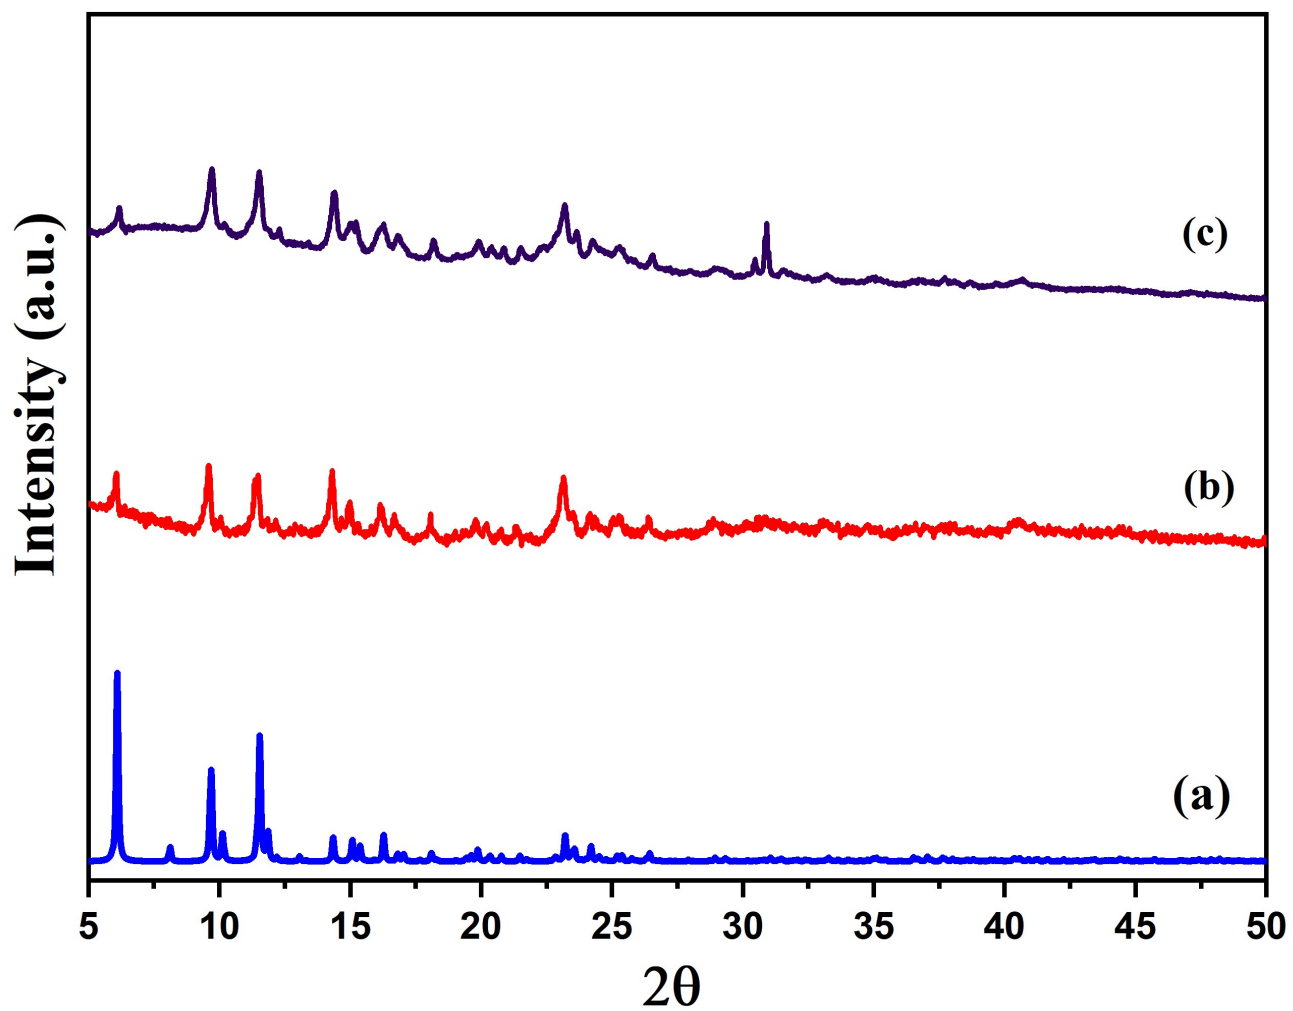

**Fig. S14:** Powder XRD (CuK $\alpha$ ) patterns of [Cd(PDA)(L)<sub>2</sub>], 1: (a) simulated from single crystal X-ray data, (b) experimental. (c) RBBR@1 after 300 min.

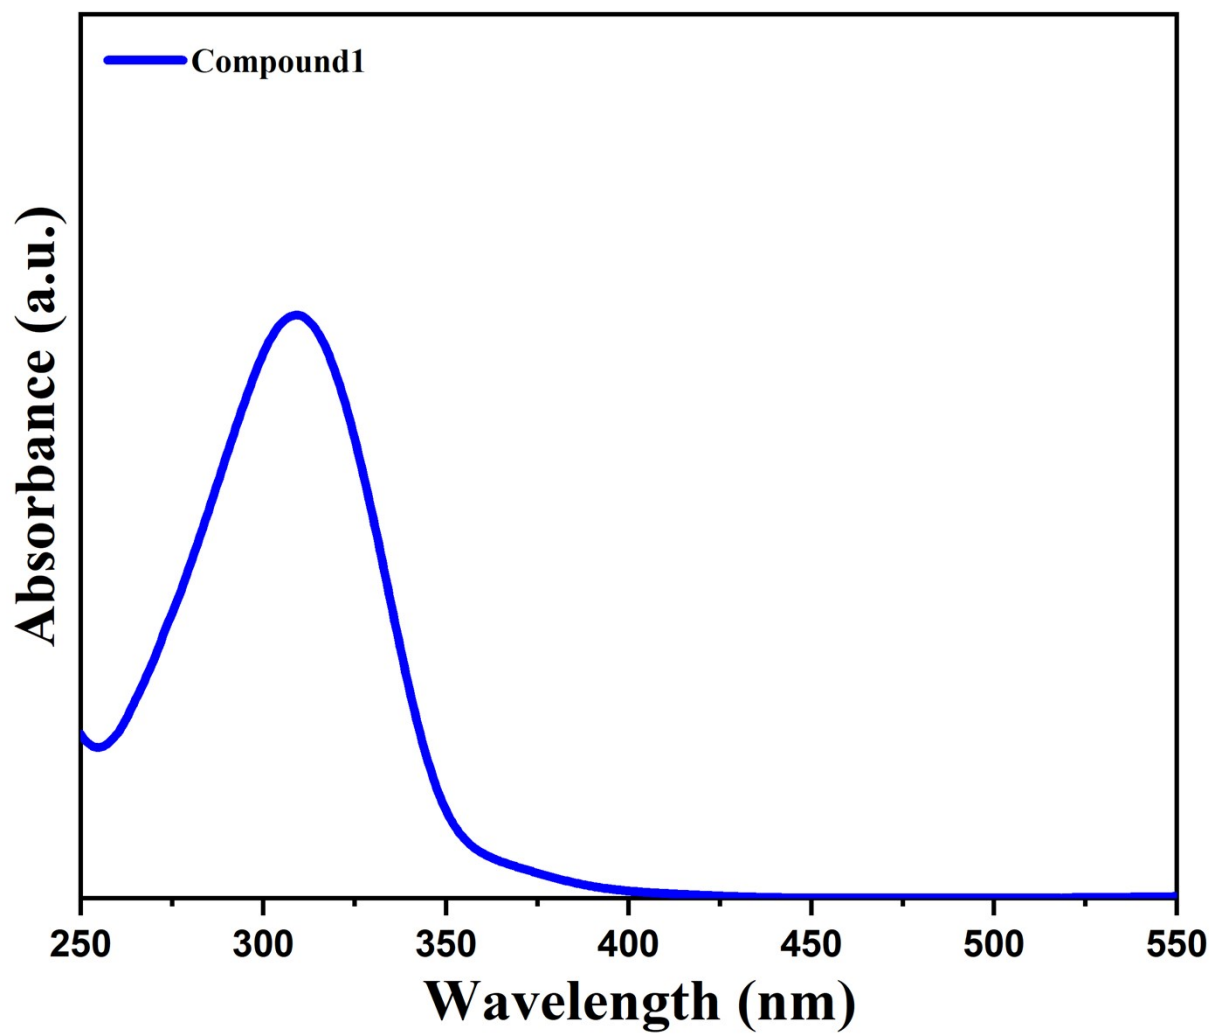

Fig. S15: Absorption spectrum of  $[\text{Cd}(\text{PDA})(\text{L})_2]$ , 1.

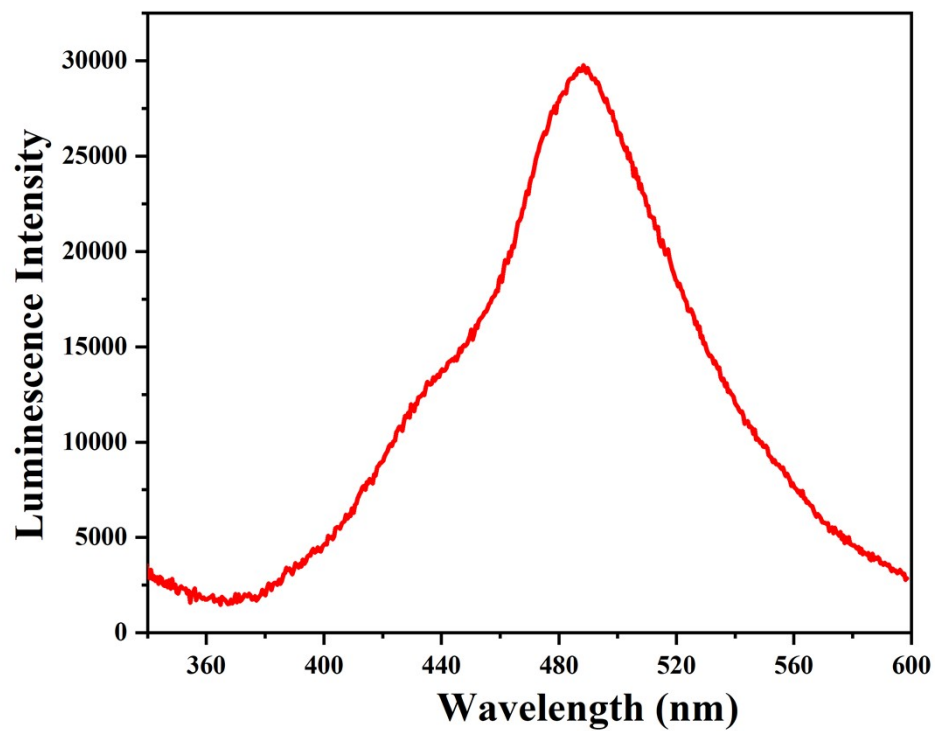

**Fig. S16:** Emission spectra of **1** in solid state ( $\lambda_{\text{ex}} = 300$  nm).



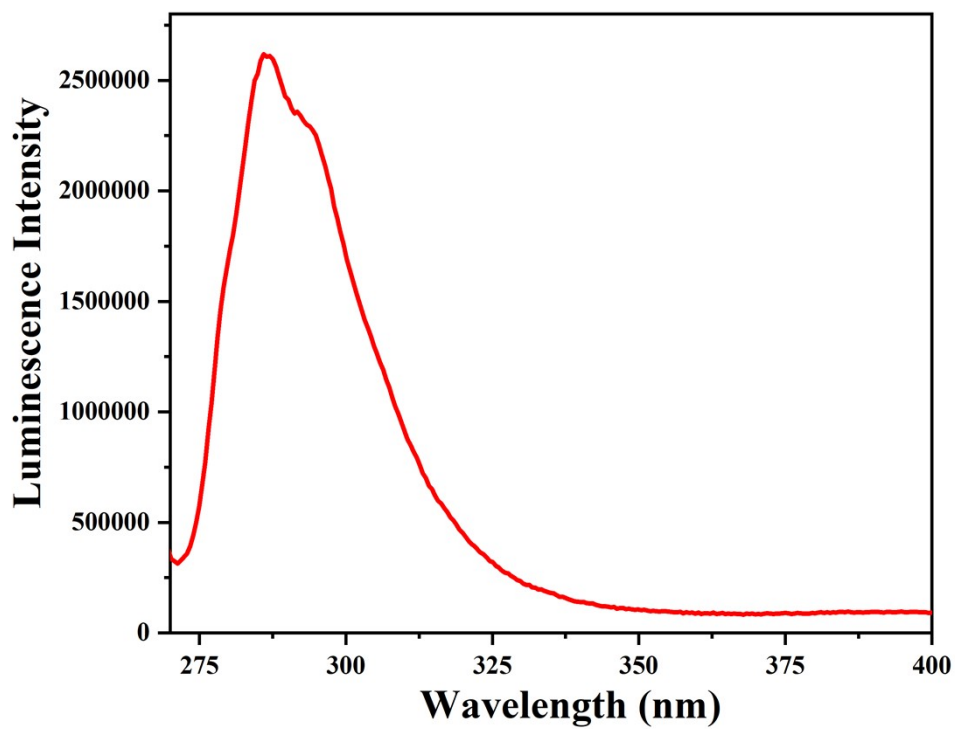

**Fig. S17:** Emission spectra of 1,4-phenylenediacetic acid in solid state ( $\lambda_{\text{ex}} = 263 \text{ nm}$ ).

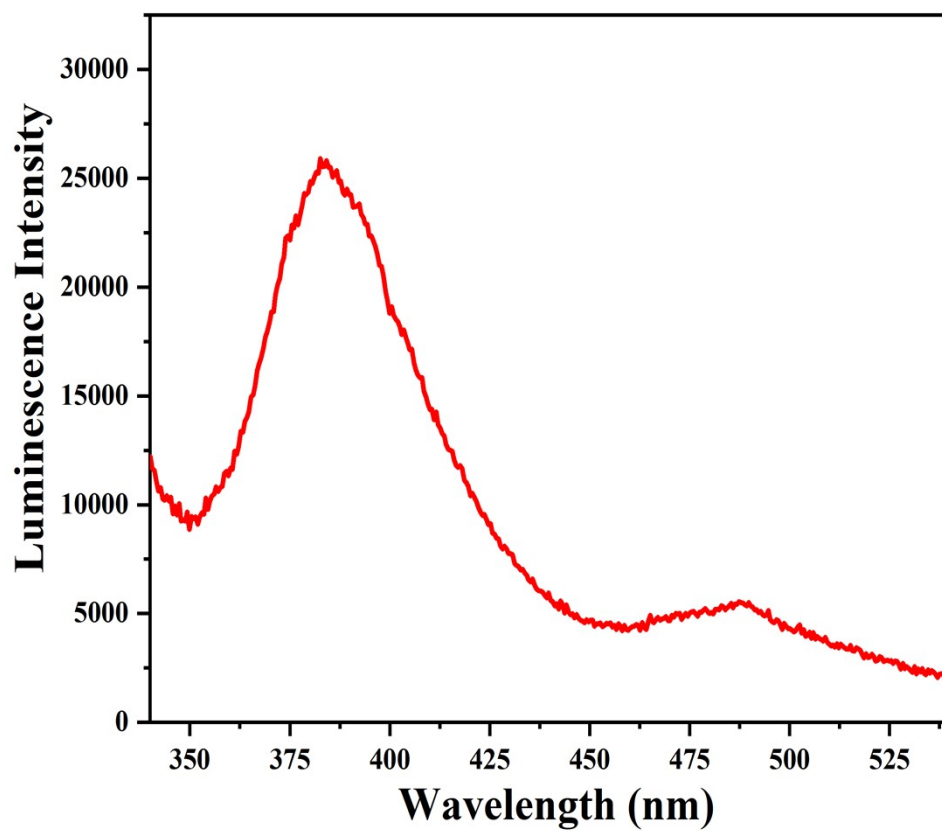

**Fig. S18:** Emission spectra of 2,4,5-tri-4-pyridyl-1H-imidazole in solid state ( $\lambda_{\text{ex}} = 300$  nm).

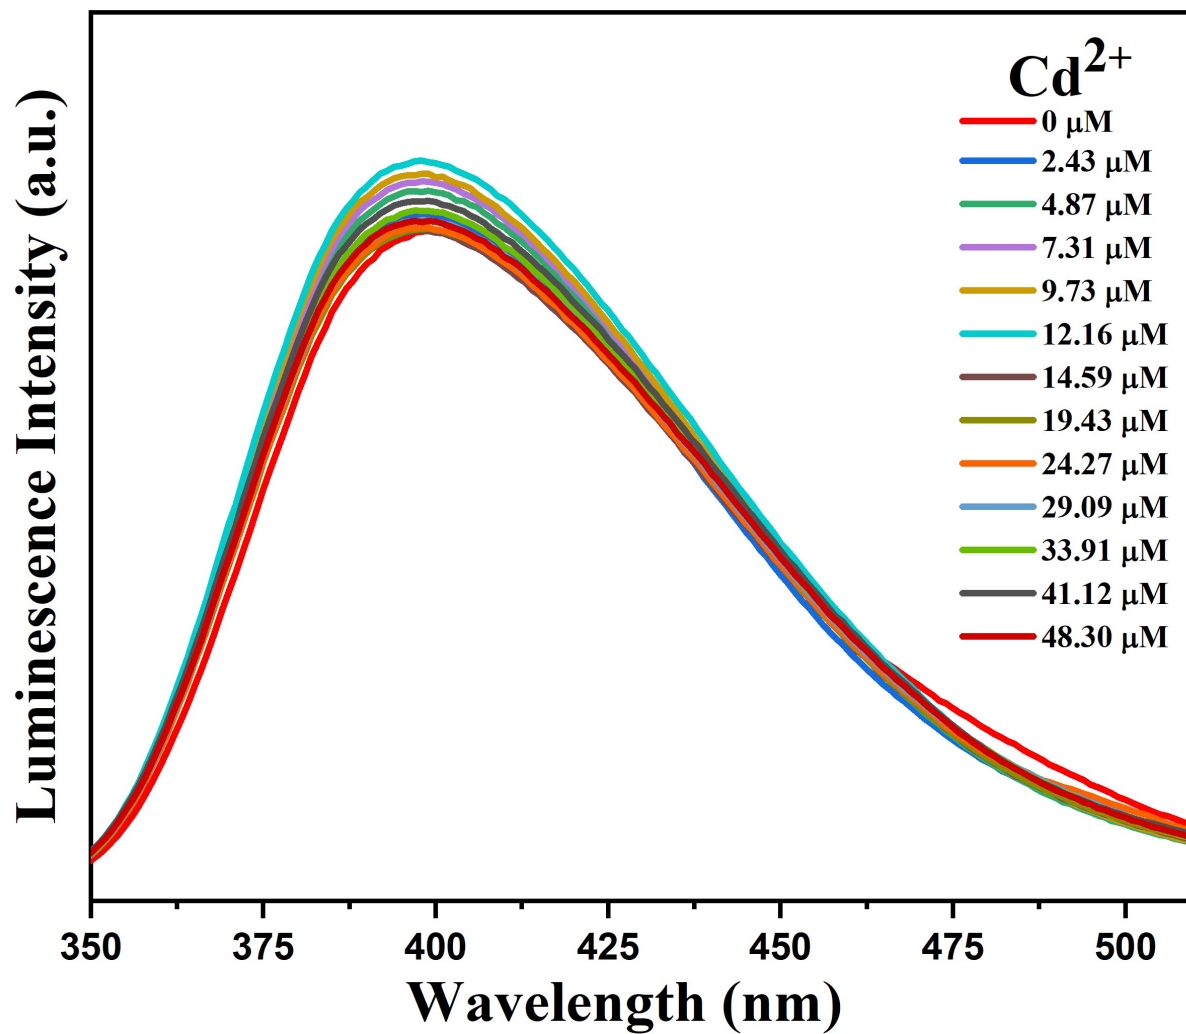

**Fig. S19:** Emission spectra of **1** dispersed in water upon incremental addition of water solution of Cd<sup>2+</sup> ions ( $\lambda_{\text{ex}} = 300$  nm). Final concentration of Cd<sup>2+</sup> ions in the medium is indicated in the legend.

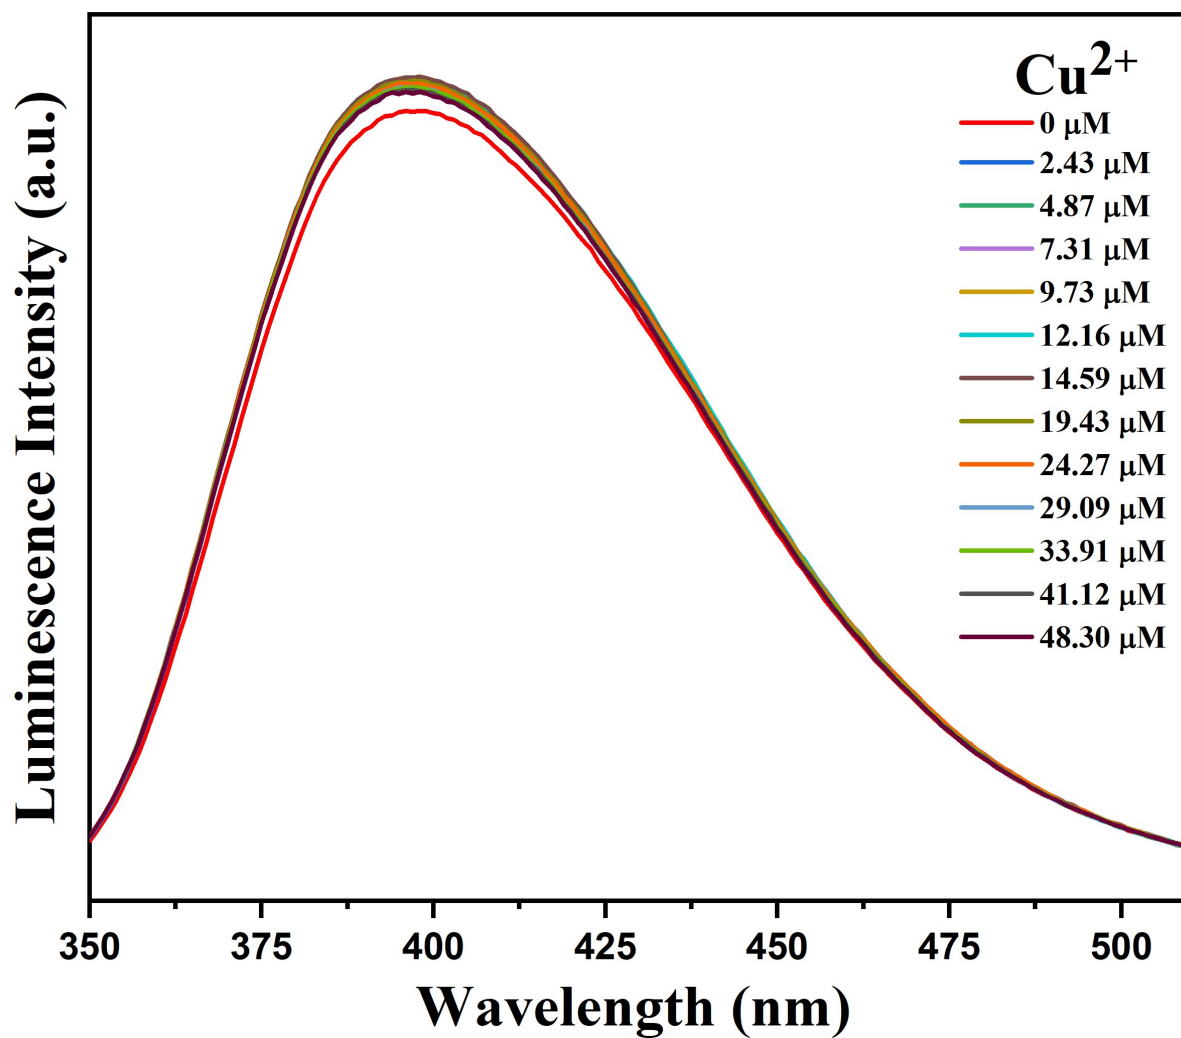

**Fig. S20:** Emission spectra of **1** dispersed in water upon incremental addition of water solution of Cu<sup>2+</sup> ions ( $\lambda_{\text{ex}} = 300$  nm). Final concentration of Cu<sup>2+</sup> ions in the medium is indicated in the legend.

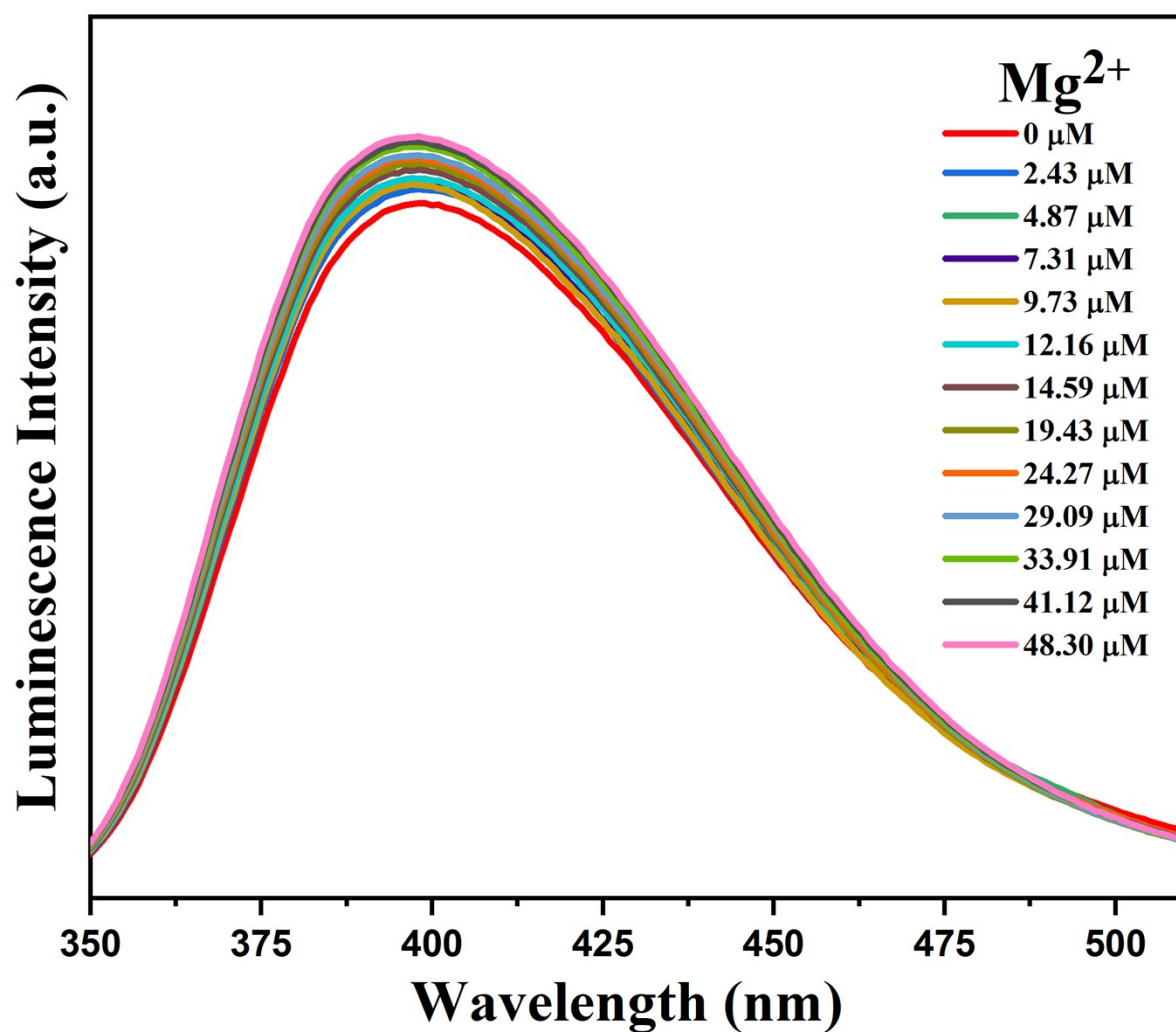

**Fig. S21:** Emission spectra of **1** dispersed in water upon incremental addition of water solution of  $\text{Mg}^{2+}$  ions ( $\lambda_{\text{ex}} = 300 \text{ nm}$ ). Final concentration of  $\text{Mg}^{2+}$  ions in the medium is indicated in the legend.

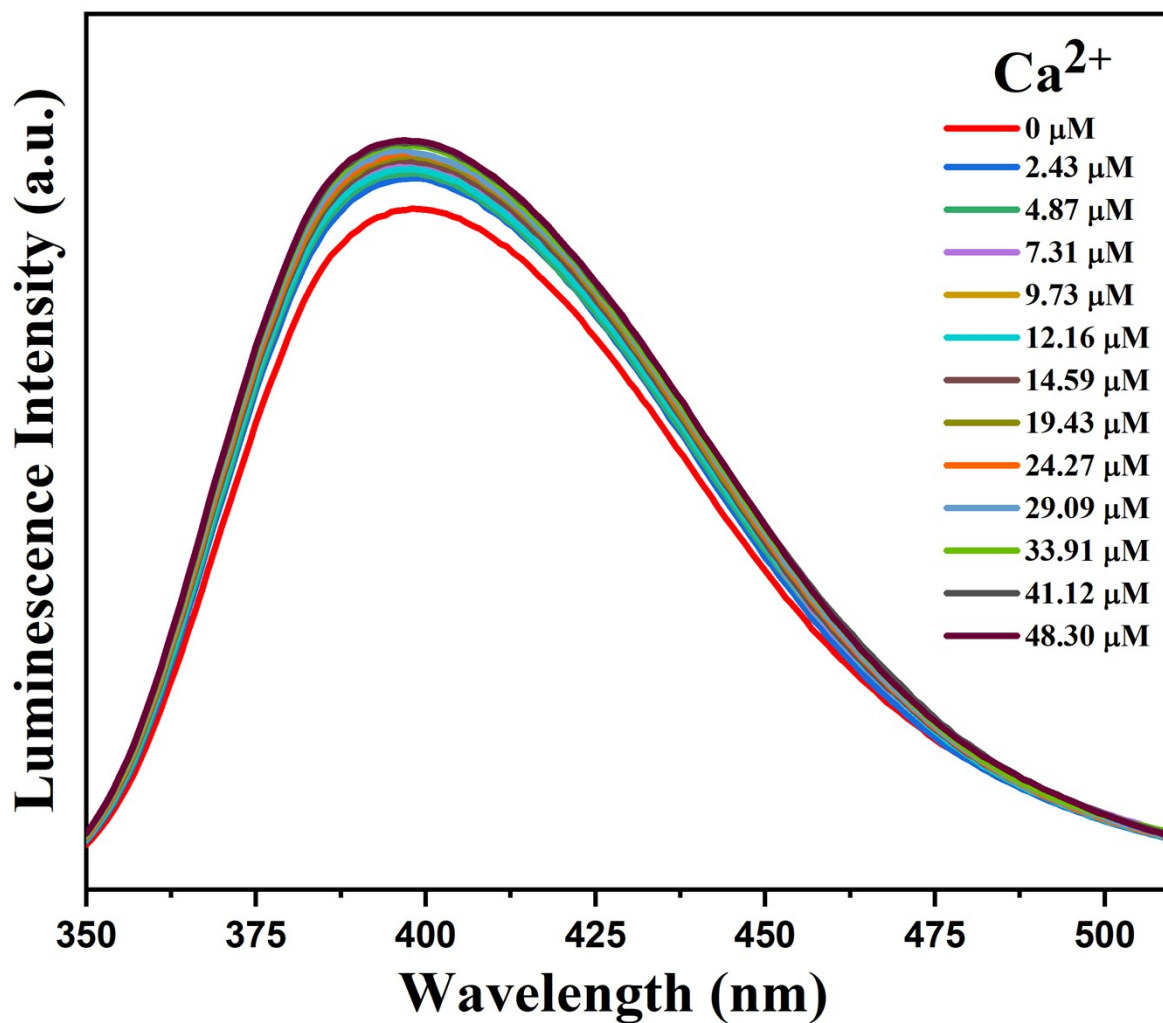

**Fig. S22:** Emission spectra of **1** dispersed in water upon incremental addition of water solution of Ca<sup>2+</sup> ions ( $\lambda_{\text{ex}} = 300$  nm). Final concentration of Ca<sup>2+</sup> ions in the medium is indicated in the legend.

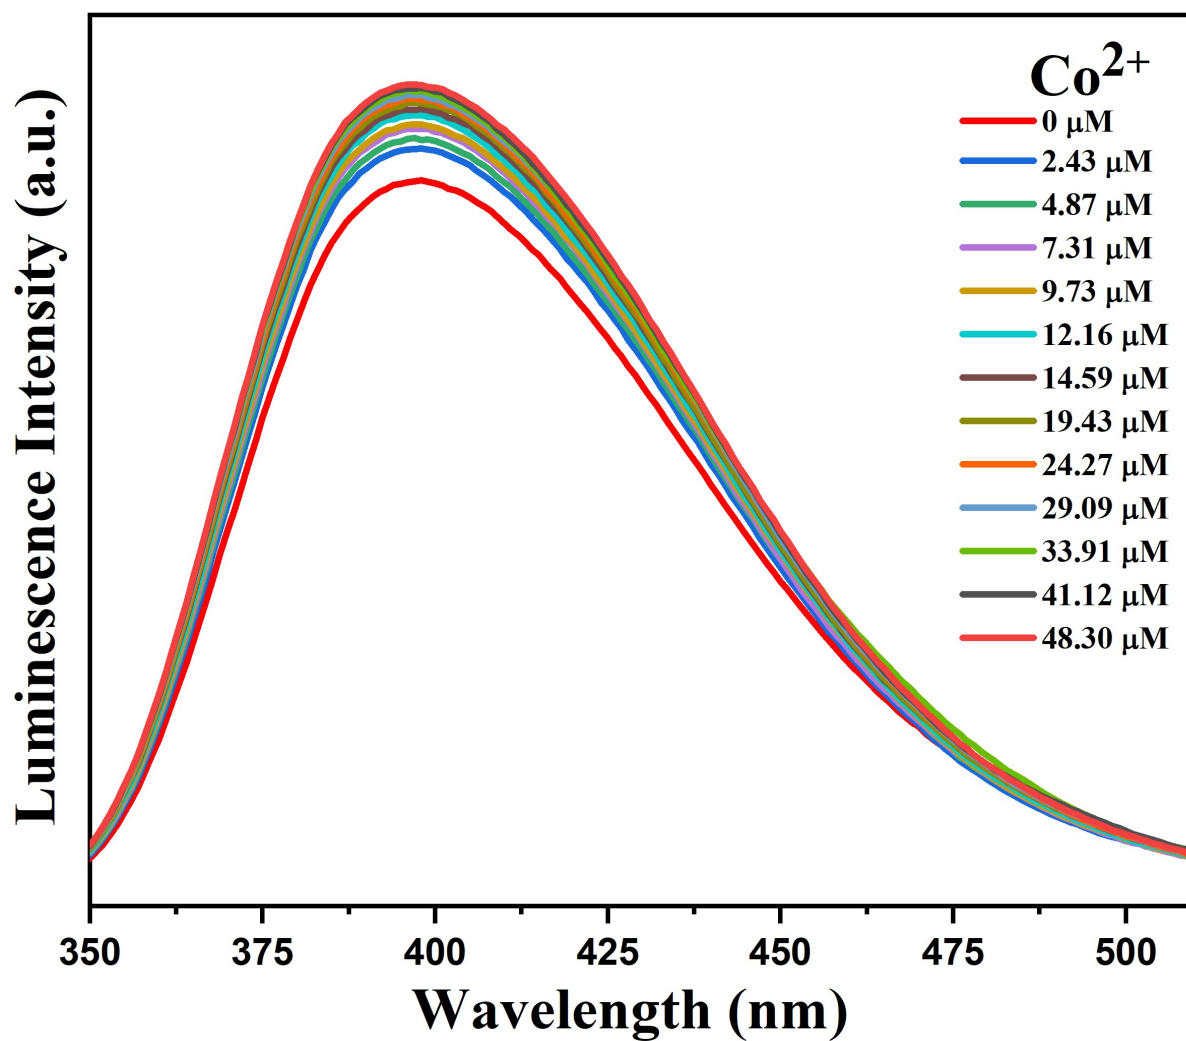

**Fig. S23:** Emission spectra of 1 dispersed in water upon incremental addition of water solution of  $\text{Co}^{2+}$  ions ( $\lambda_{\text{ex}} = 300 \text{ nm}$ ). Final concentration of  $\text{Co}^{2+}$  ions in the medium is indicated in the legend.

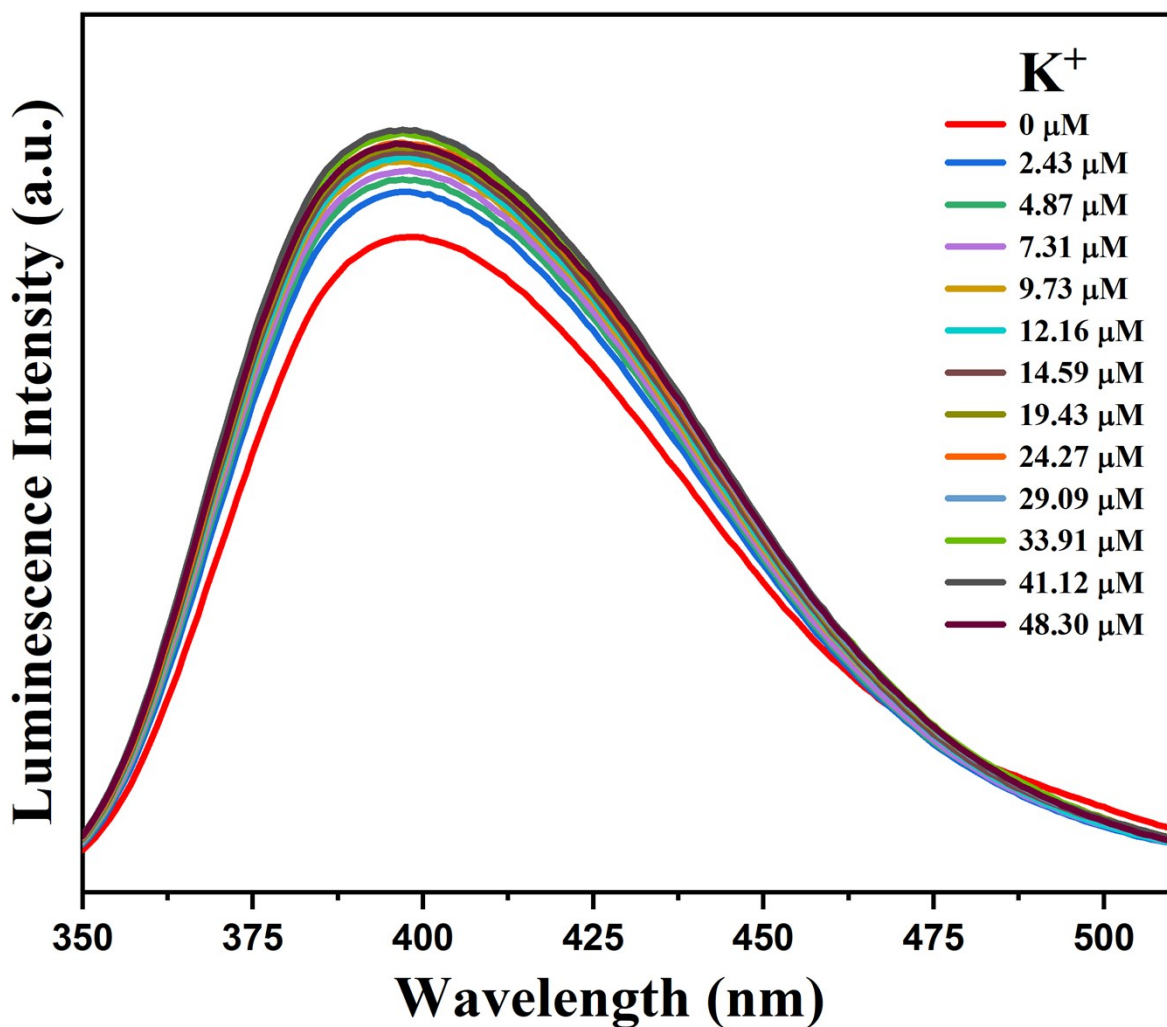

**Fig. S24:** Emission spectra of **1** dispersed in water upon incremental addition of water solution of  $K^+$  ions ( $\lambda_{\text{ex}} = 300 \text{ nm}$ ). Final concentration of  $K^+$  ions in the medium is indicated in the legend.



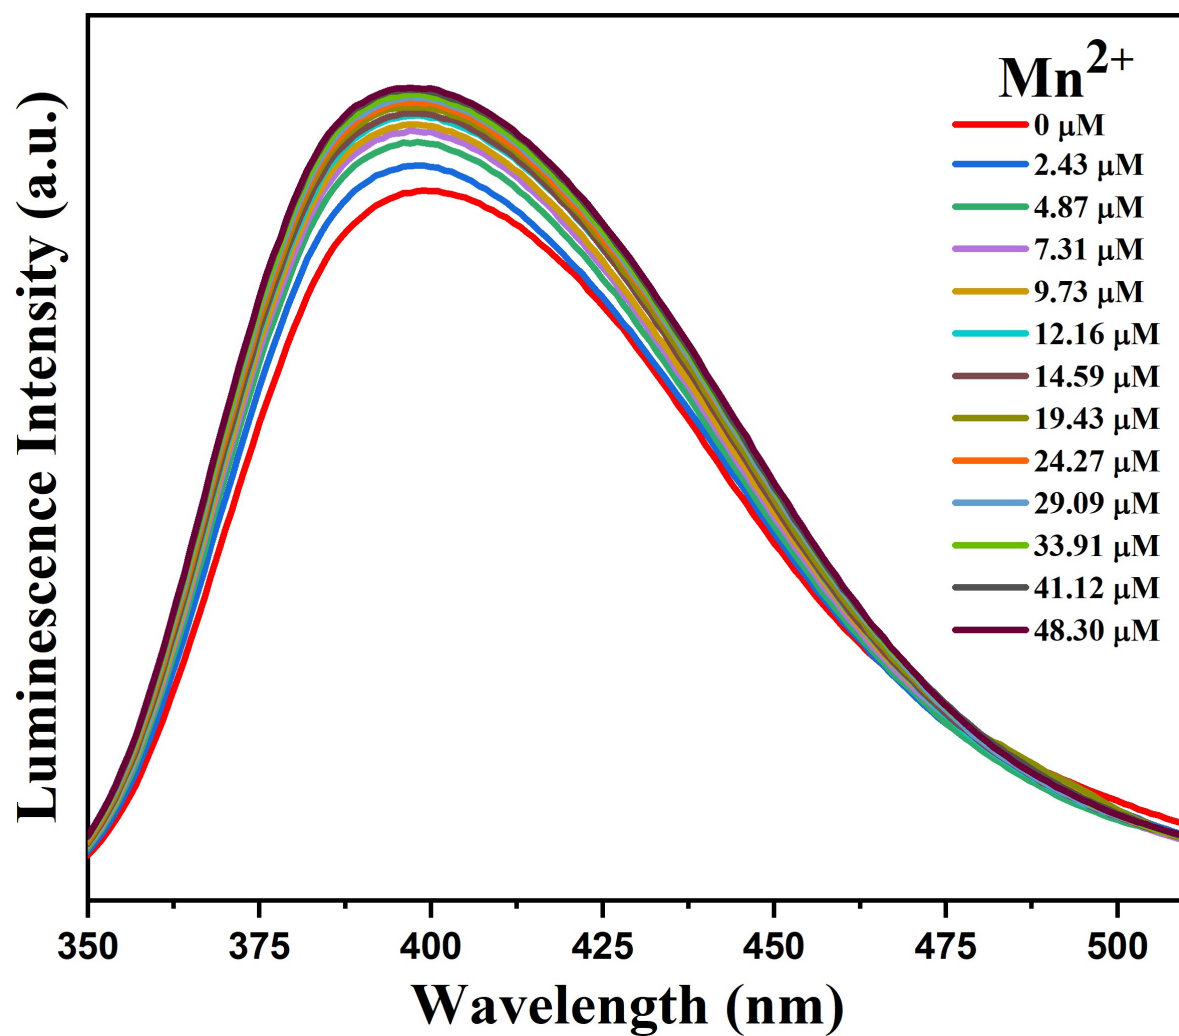

Fig. S25: Emission spectra of 1 dispersed in water upon incremental addition of water solution of Mn<sup>2+</sup> ions ( $\lambda_{\text{ex}} = 300 \text{ nm}$ ). Final concentration of Mn<sup>2+</sup> ions in the medium is indicated in the legend.

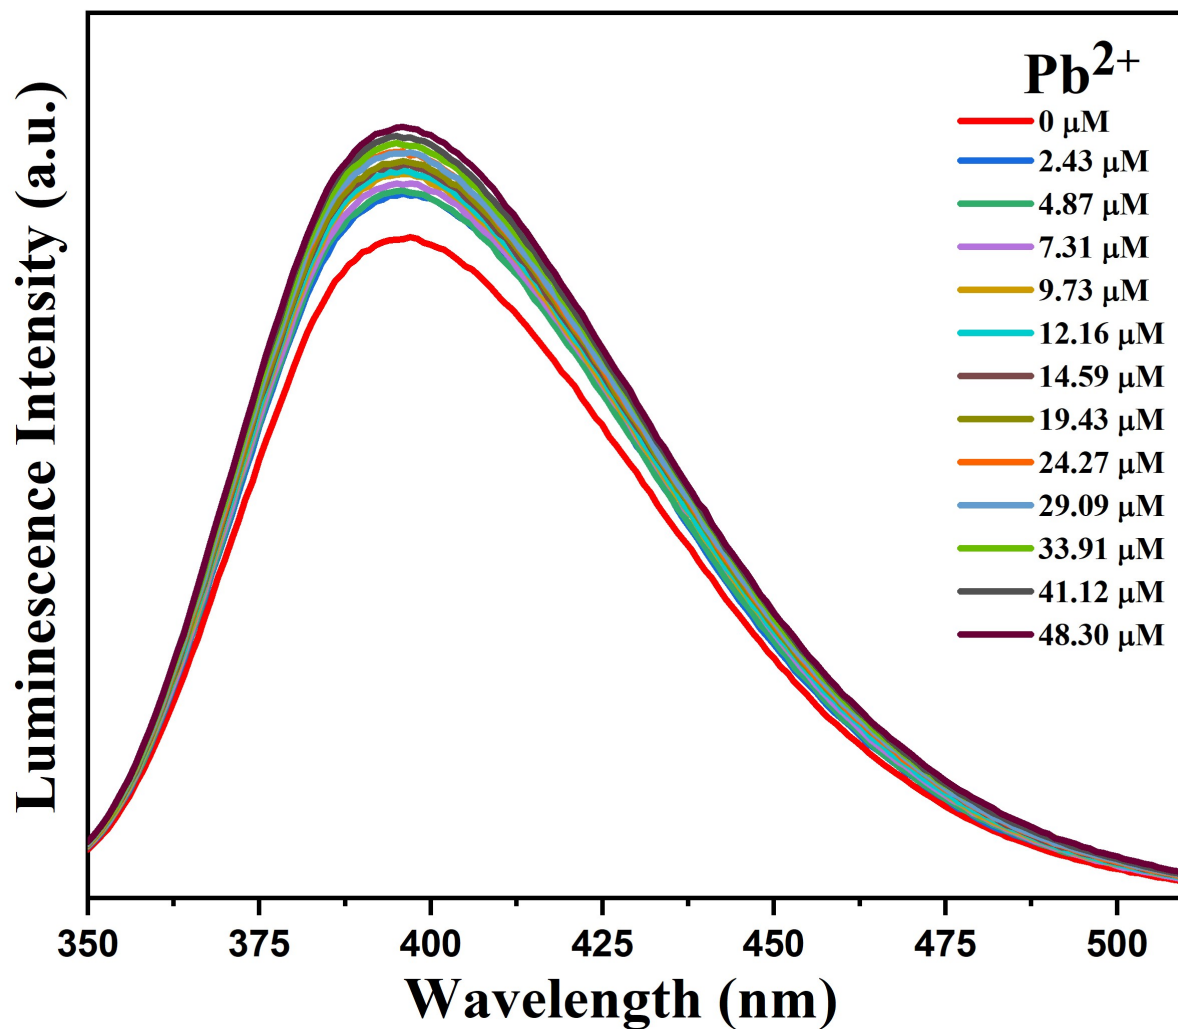

**Fig. S26:** Emission spectra of **1** dispersed in water upon incremental addition of water solution of Pb<sup>2+</sup> ions ( $\lambda_{\text{ex}} = 300$  nm). Final concentration of Pb<sup>2+</sup> ions in the medium is indicated in the legend.

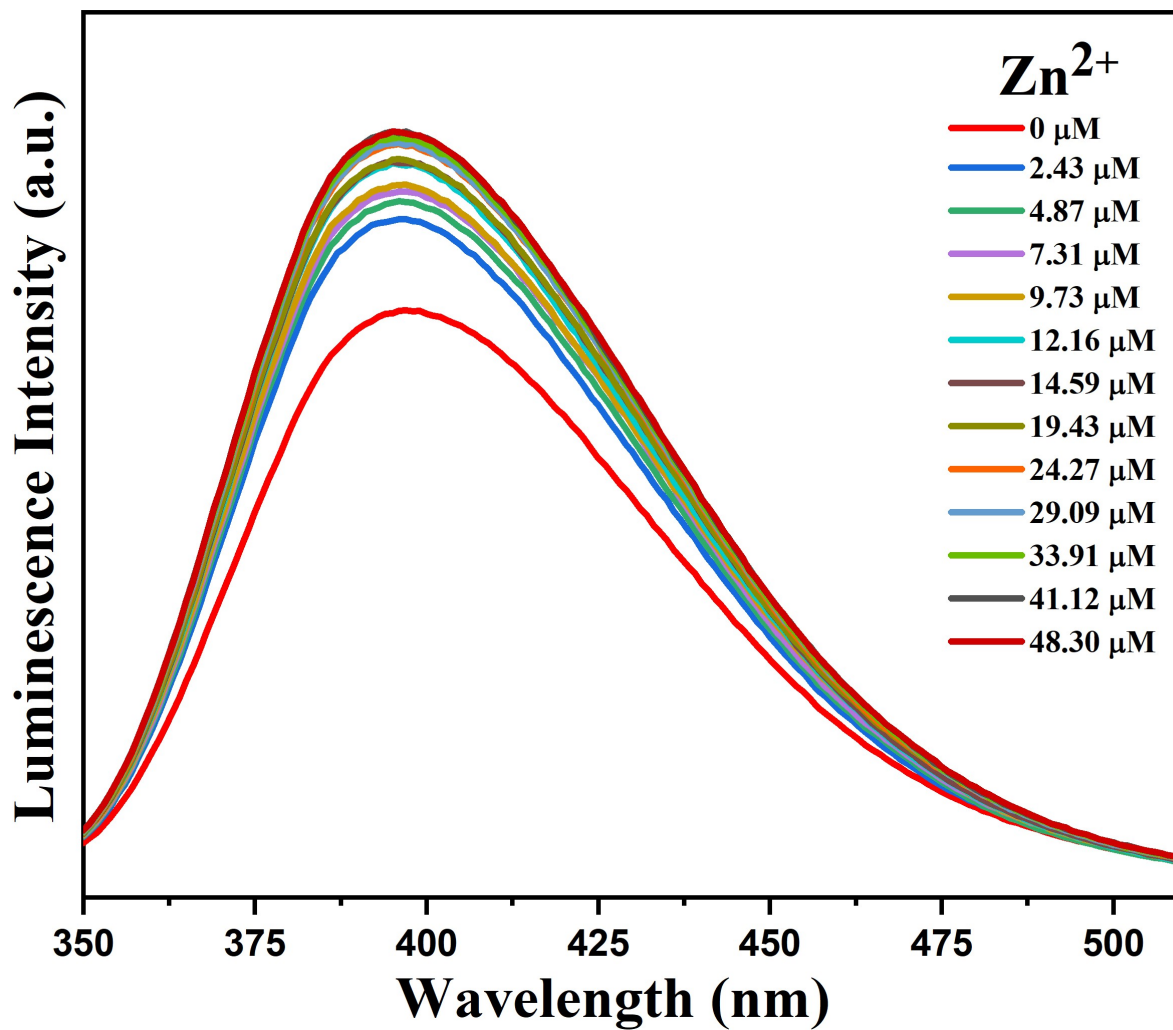

**Fig. S27:** Emission spectra of **1** dispersed in water upon incremental addition of water solution of Zn<sup>2+</sup> ions ( $\lambda_{\text{ex}} = 300$  nm). Final concentration of Zn<sup>2+</sup> ions in the medium is indicated in the legend.

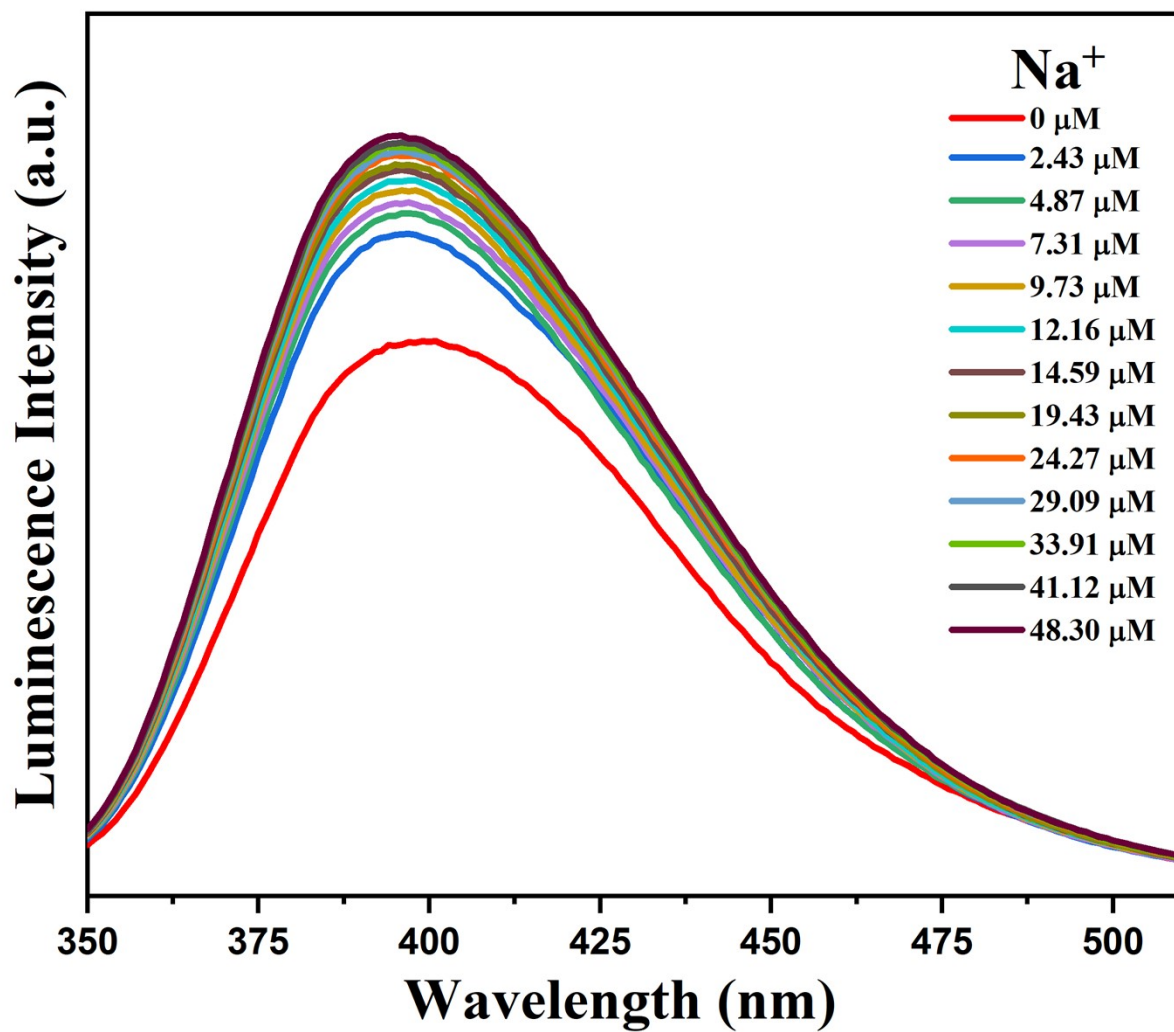

**Fig. S28:** Emission spectra of **1** dispersed in water upon incremental addition of water solution of Na<sup>+</sup> ions ( $\lambda_{\text{ex}} = 300$  nm). Final concentration of Na<sup>+</sup> ions in the medium is indicated in the legend.

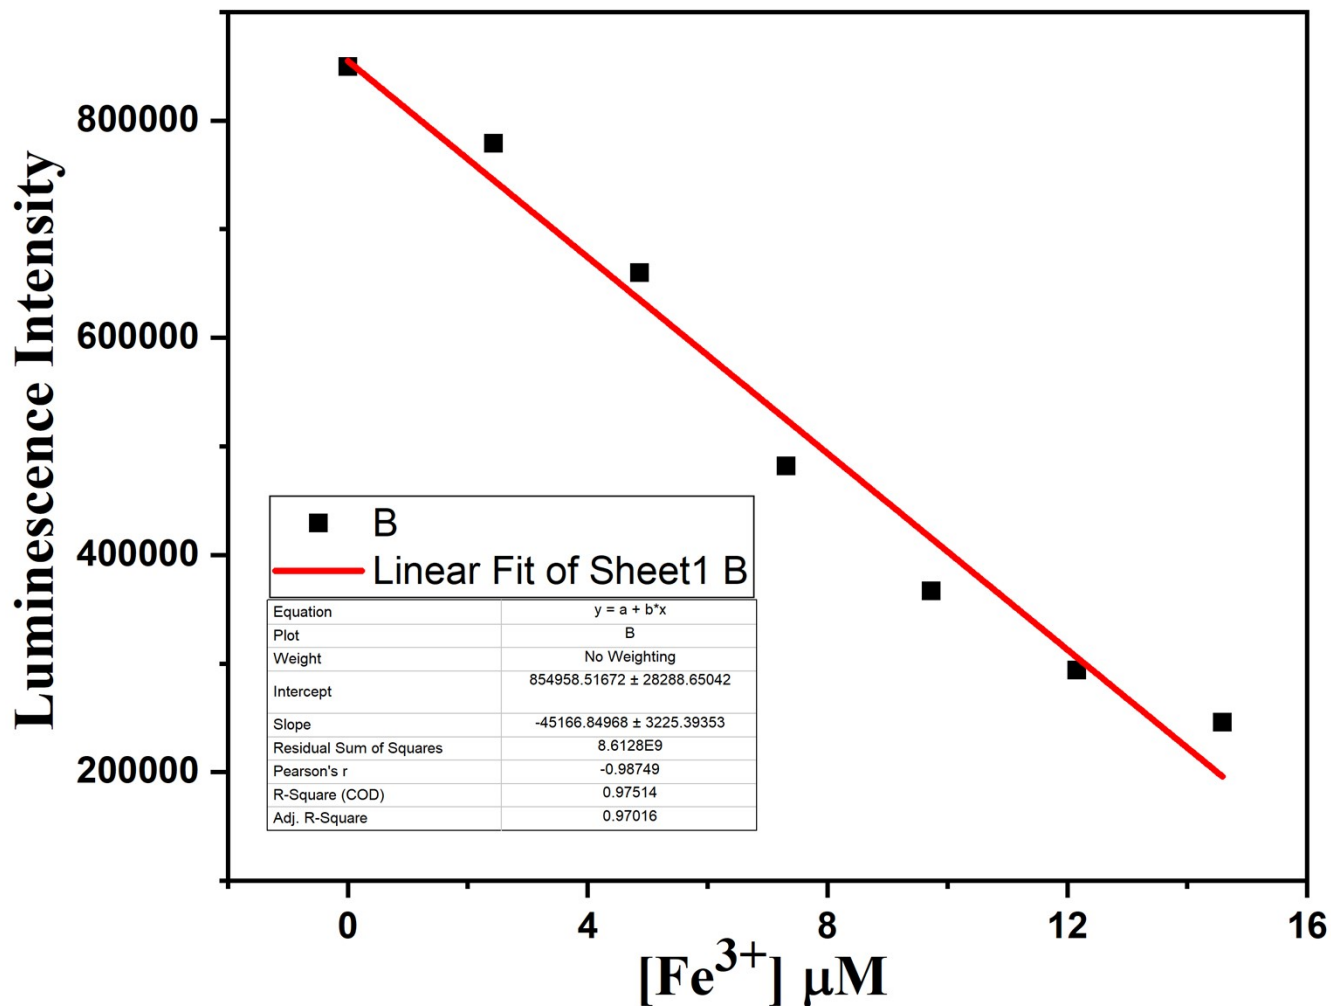

**Fig. S29:** The plot of the changes of luminescence intensity of compound **1** ( $\lambda_{em} = 398$  nm) vs concentration of  $Fe^{3+}$  solution (upto 14.59  $\mu M$ ) indicating the detection limit, which calculated using the equation,  $LOD = 3\sigma/m$ , where  $\sigma$  = standard deviation of blank determination and  $m$  = slope of the linear curve.

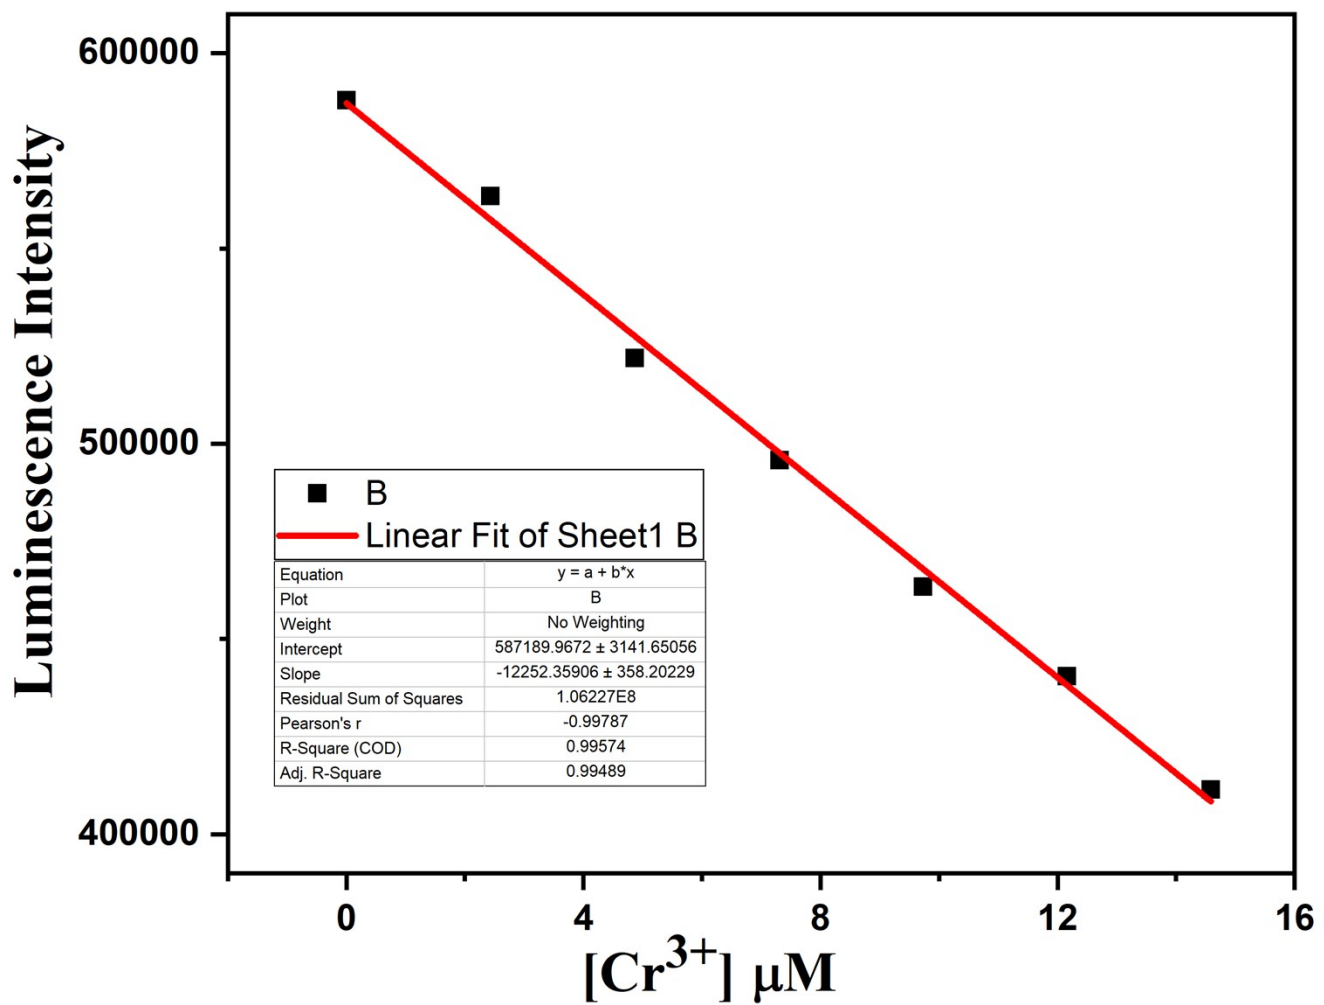

**Fig. S30:** The plot of the changes of luminescence intensity of compound **1** ( $\lambda_{em} = 398$  nm) vs concentration of  $Cr^{3+}$  solution (upto 14.59  $\mu M$ ) indicating the detection limit, which calculated using the equation,  $LOD = 3\sigma/m$ , where  $\sigma$  = standard deviation of blank determination and  $m$  = slope of the linear curve.

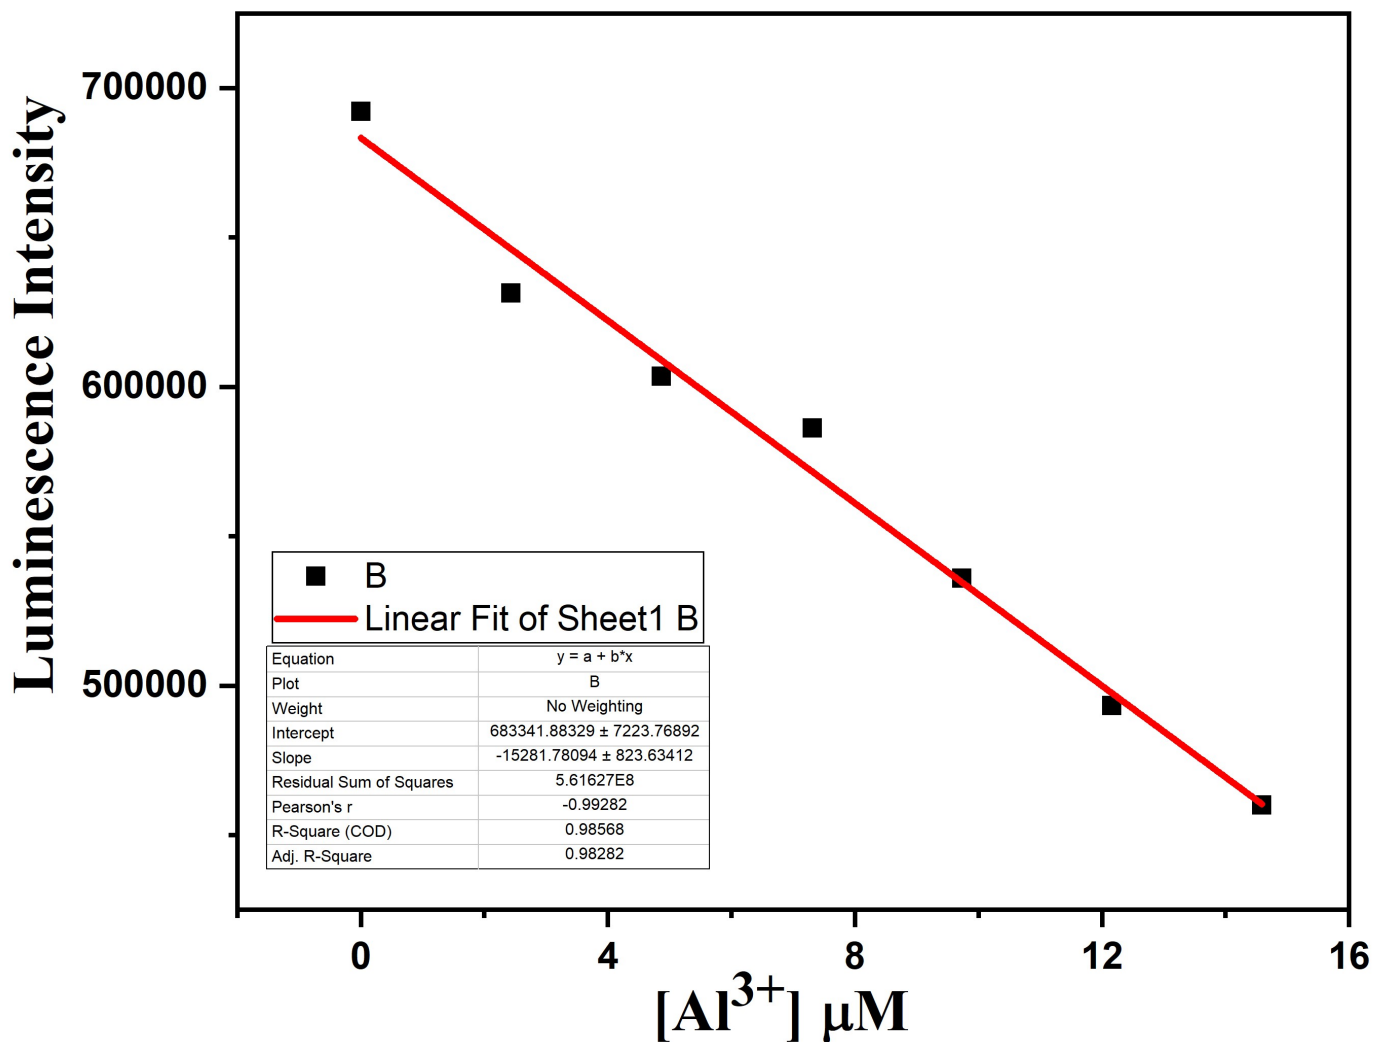

**Fig. S31:** The plot of the changes of luminescence intensity of compound **1** ( $\lambda_{em} = 398$  nm) vs concentration of  $Al^{3+}$  solution (upto  $14.59 \mu M$ ) indicating the detection limit, which calculated using the equation,  $LOD = 3\sigma/m$ , where  $\sigma$  = standard deviation of blank determination and  $m$  = slope of the linear curve.

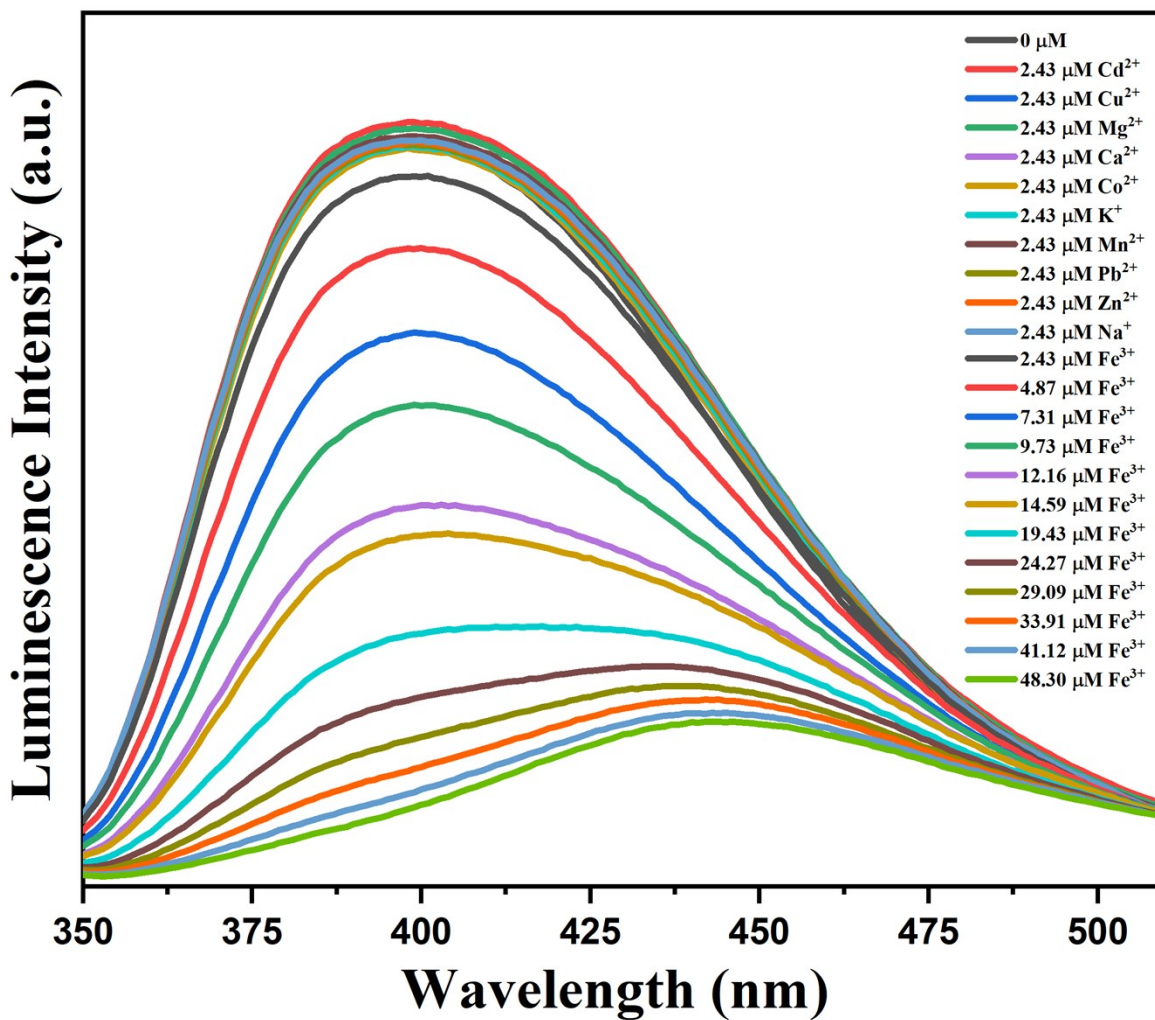

**Fig. S32:** Emission spectra of **1** dispersed in water upon incremental addition of Fe<sup>3+</sup> solution in the presence of 2.43 μM concentration of various metal ions ( $\lambda_{\text{ex}} = 300$  nm).



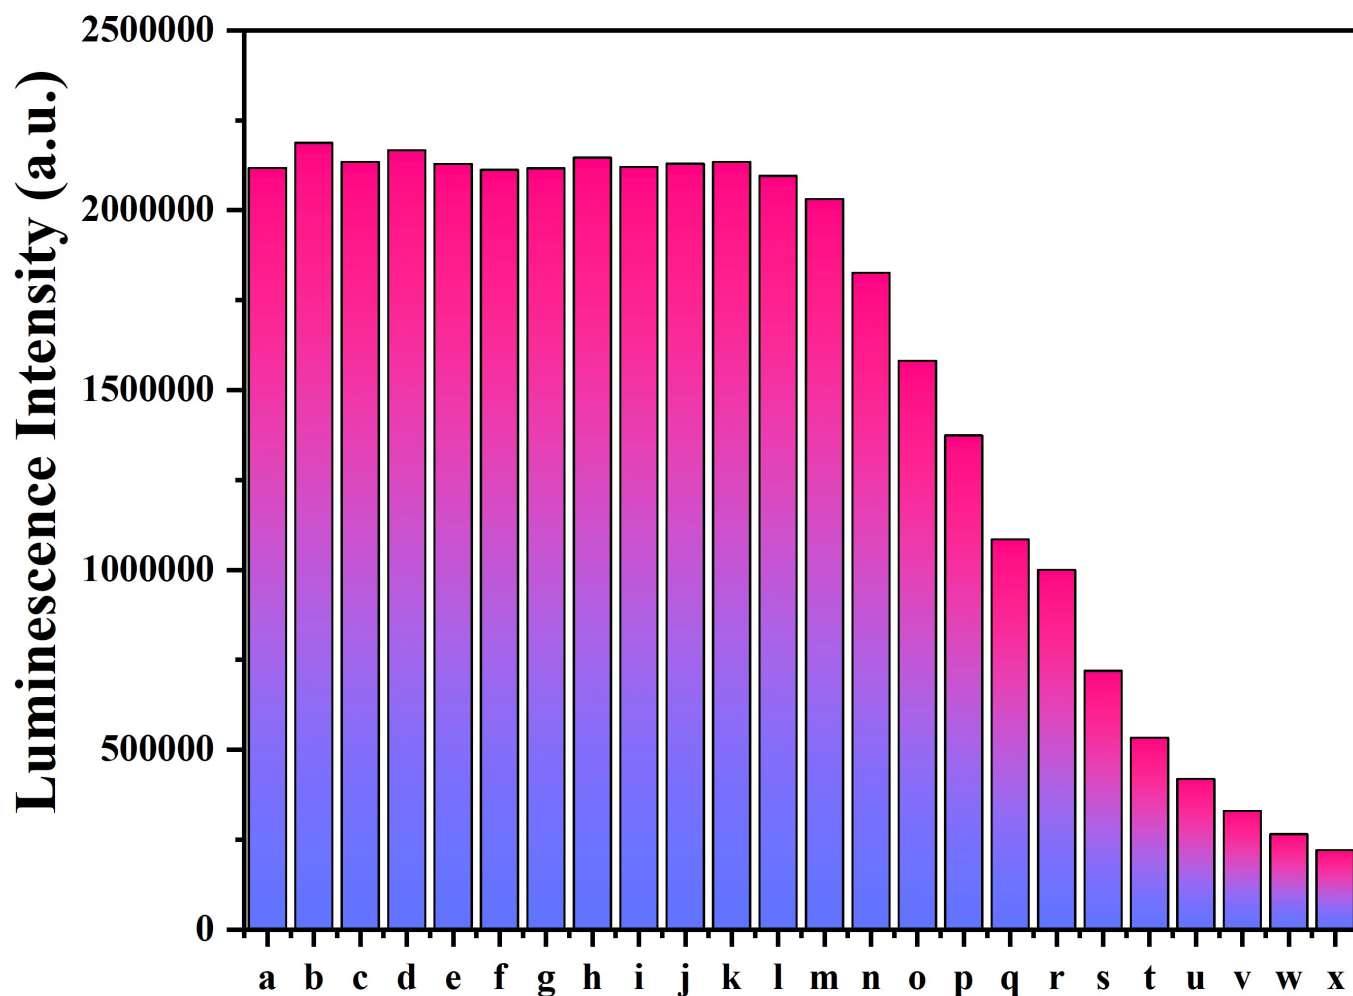

**Fig. S33:** Bar diagram presenting the luminescence intensity (observed at 398 nm) after the consecutive addition of the analytes. The composition and concentration of the system were as follows: (a) **1** in aqueous dispersion, (b) a + 2.43  $\mu\text{M}$   $\text{Cd}^{2+}$ , (c) b + 2.43  $\mu\text{M}$   $\text{Cu}^{2+}$ , (d) c + 2.43  $\mu\text{M}$   $\text{Mg}^{2+}$ , (e) d + 2.43  $\mu\text{M}$   $\text{Ca}^{2+}$ , (f) e + 2.43  $\mu\text{M}$   $\text{Co}^{2+}$ , (g) f + 2.43  $\mu\text{M}$   $\text{K}^{+}$ , (h) g + 2.43  $\mu\text{M}$   $\text{Mn}^{2+}$ , (i) h + 2.43  $\mu\text{M}$   $\text{Pb}^{2+}$ , (j) i + 2.43  $\mu\text{M}$   $\text{Zn}^{2+}$ , (k) j + 2.43  $\mu\text{M}$   $\text{Na}^{+}$ , (l) k + 2.43  $\mu\text{M}$   $\text{Fe}^{3+}$ , (m) l + 2.43  $\mu\text{M}$   $\text{Fe}^{3+}$ , (n) m + 2.43  $\mu\text{M}$   $\text{Fe}^{3+}$ , (o) n + 2.43  $\mu\text{M}$   $\text{Fe}^{3+}$ , (p) o + 2.43  $\mu\text{M}$   $\text{Fe}^{3+}$ , (q) p + 2.43  $\mu\text{M}$   $\text{Fe}^{3+}$ , (r) q + 4.87  $\mu\text{M}$   $\text{Fe}^{3+}$ , (s) r + 4.87  $\mu\text{M}$   $\text{Fe}^{3+}$ , (t) s + 4.87  $\mu\text{M}$   $\text{Fe}^{3+}$ , (u) q + 4.87  $\mu\text{M}$   $\text{Fe}^{3+}$ , (v) r + 4.87  $\mu\text{M}$   $\text{Fe}^{3+}$ , (w) s + 7.31  $\mu\text{M}$   $\text{Fe}^{3+}$ , and (x) s + 7.31  $\mu\text{M}$   $\text{Fe}^{3+}$ .

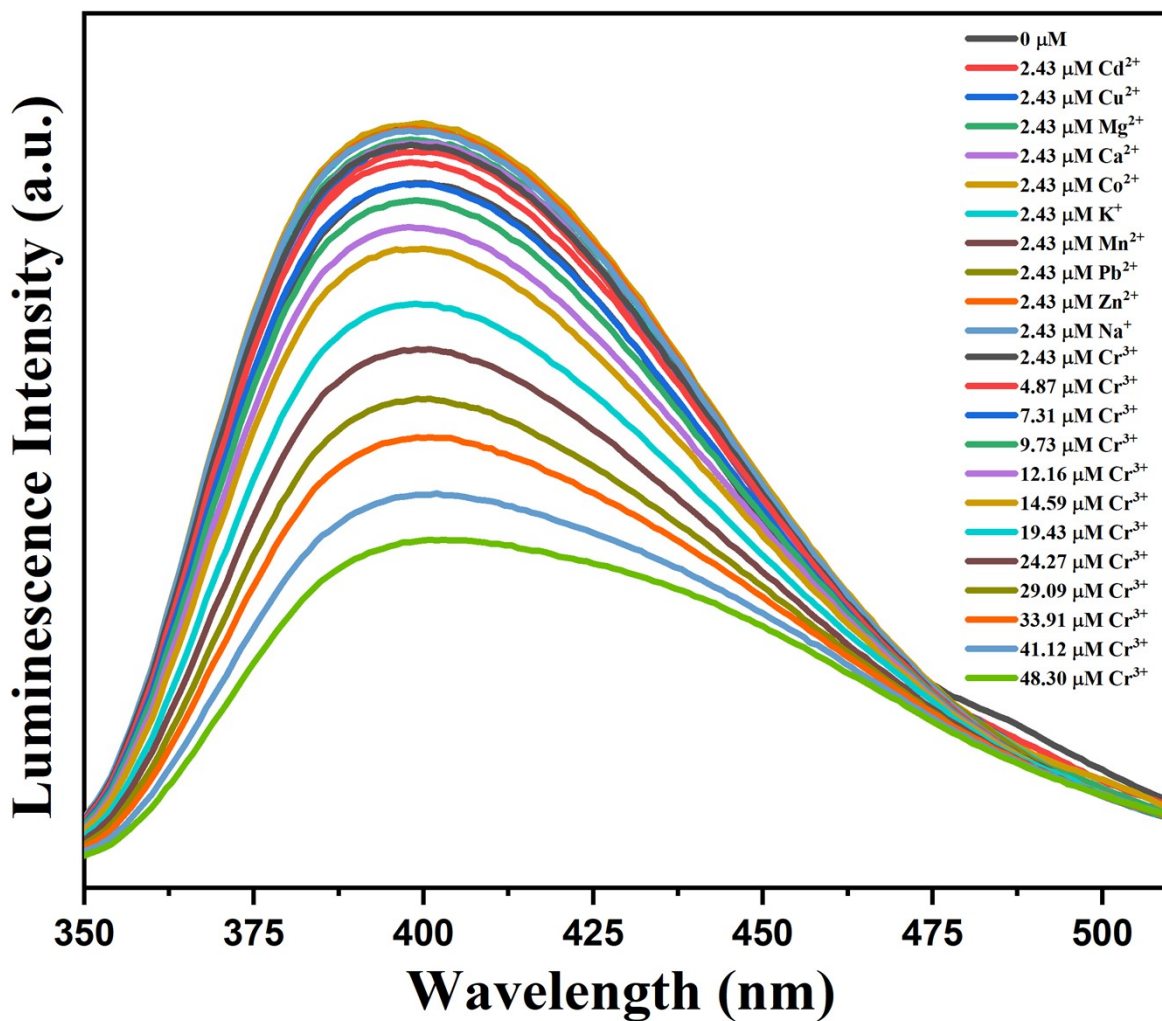

Fig. S34: Emission spectra of 1 dispersed in water upon incremental addition of Cr<sup>3+</sup> solution in the presence of 2.43 μM concentration of various metal ions ( $\lambda_{\text{ex}} = 300 \text{ nm}$ ).

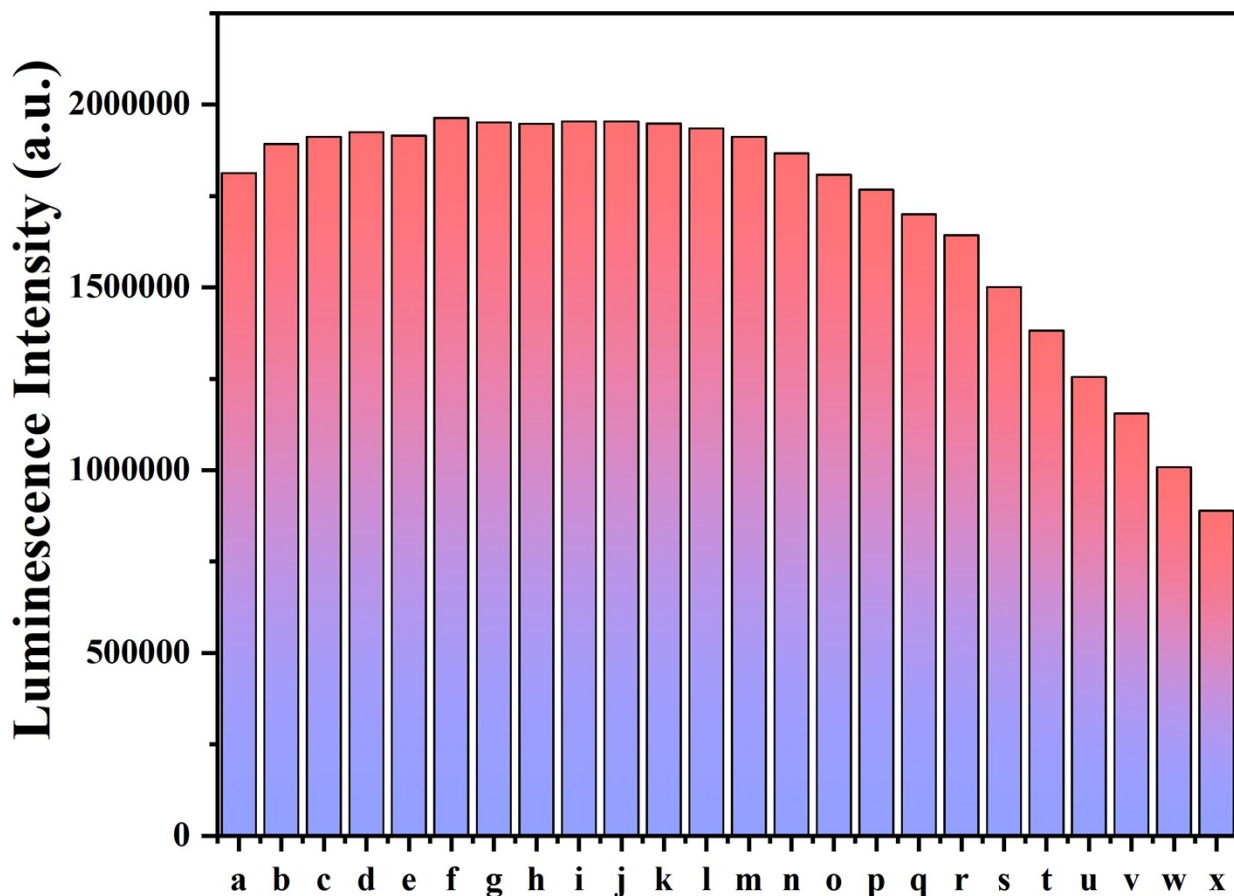

**Fig. S35:** Bar diagram presenting the luminescence intensity (observed at 398 nm) after the consecutive addition of the analytes. The composition and concentration of the system were as follows: (a) **1** in aqueous dispersion, (b) a + 2.43  $\mu\text{M}$   $\text{Cd}^{2+}$ , (c) b + 2.43  $\mu\text{M}$   $\text{Cu}^{2+}$ , (d) c + 2.43  $\mu\text{M}$   $\text{Mg}^{2+}$ , (e) d + 2.43  $\mu\text{M}$   $\text{Ca}^{2+}$ , (f) e + 2.43  $\mu\text{M}$   $\text{Co}^{2+}$ , (g) f + 2.43  $\mu\text{M}$   $\text{K}^{+}$ , (h) g + 2.43  $\mu\text{M}$   $\text{Mn}^{2+}$ , (i) h + 2.43  $\mu\text{M}$   $\text{Pb}^{2+}$ , (j) i + 2.43  $\mu\text{M}$   $\text{Zn}^{2+}$ , (k) j + 2.43  $\mu\text{M}$   $\text{Na}^{+}$ , (l) k + 2.43  $\mu\text{M}$   $\text{Cr}^{3+}$ , (m) l + 2.43  $\mu\text{M}$   $\text{Cr}^{3+}$ , (n) m + 2.43  $\mu\text{M}$   $\text{Cr}^{3+}$ , (o) n + 2.43  $\mu\text{M}$   $\text{Cr}^{3+}$ , (p) o + 2.43  $\mu\text{M}$   $\text{Cr}^{3+}$ , (q) p + 2.43  $\mu\text{M}$   $\text{Cr}^{3+}$ , (r) q + 4.87  $\mu\text{M}$   $\text{Cr}^{3+}$ , (s) r + 4.87  $\mu\text{M}$   $\text{Cr}^{3+}$ , (t) s + 4.87  $\mu\text{M}$   $\text{Cr}^{3+}$ , (u) q + 4.87  $\mu\text{M}$   $\text{Cr}^{3+}$ , (v) r + 4.87  $\mu\text{M}$   $\text{Cr}^{3+}$ , (w) s + 7.31  $\mu\text{M}$   $\text{Cr}^{3+}$ , and (x) s + 7.31  $\mu\text{M}$   $\text{Cr}^{3+}$ .

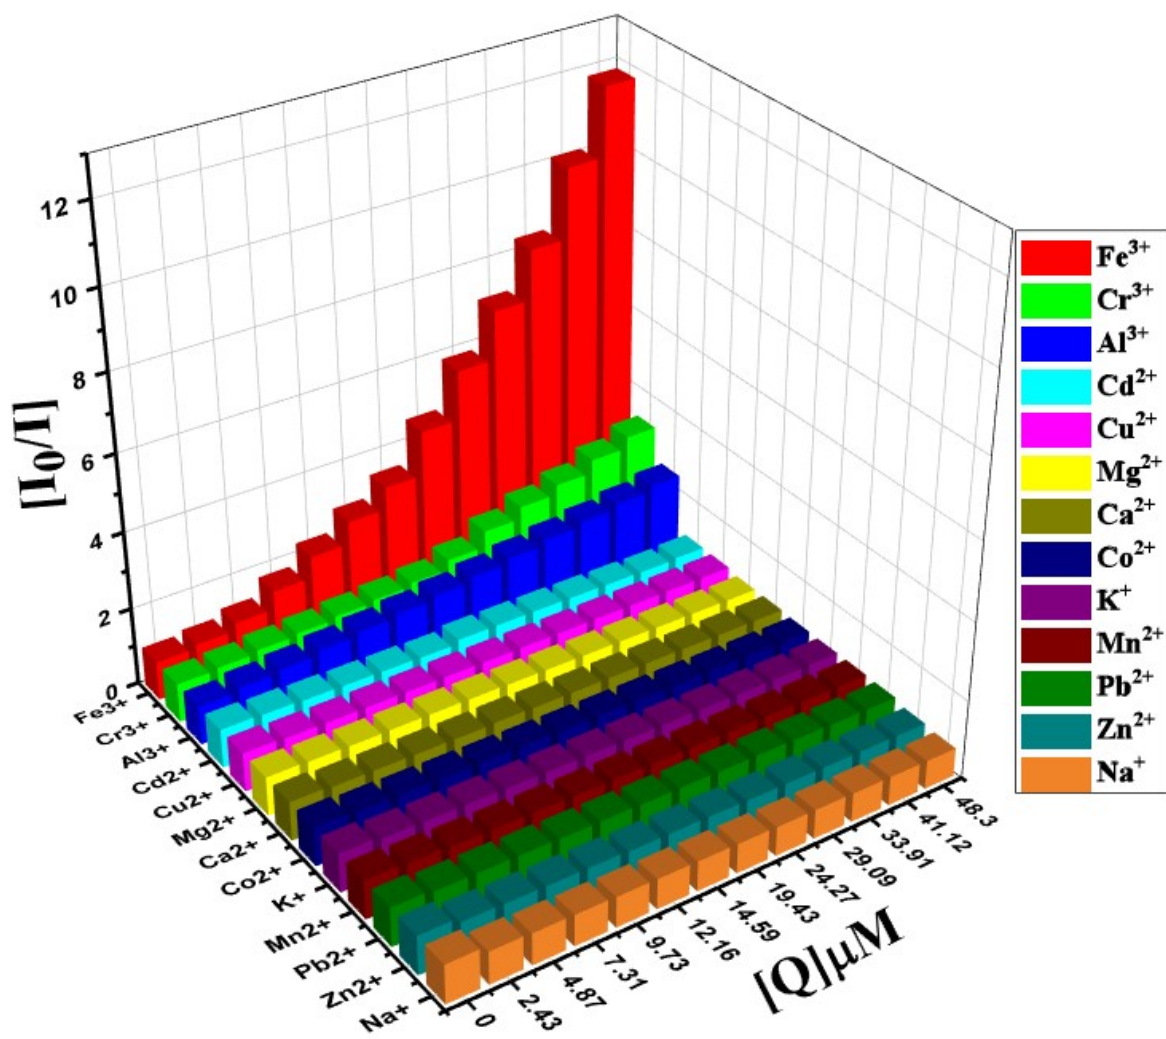

**Fig. 36:** Stern-Volmer plots of various metal ions in higher concentration range (upto 48.30  $\mu M$ ) for compound 1.

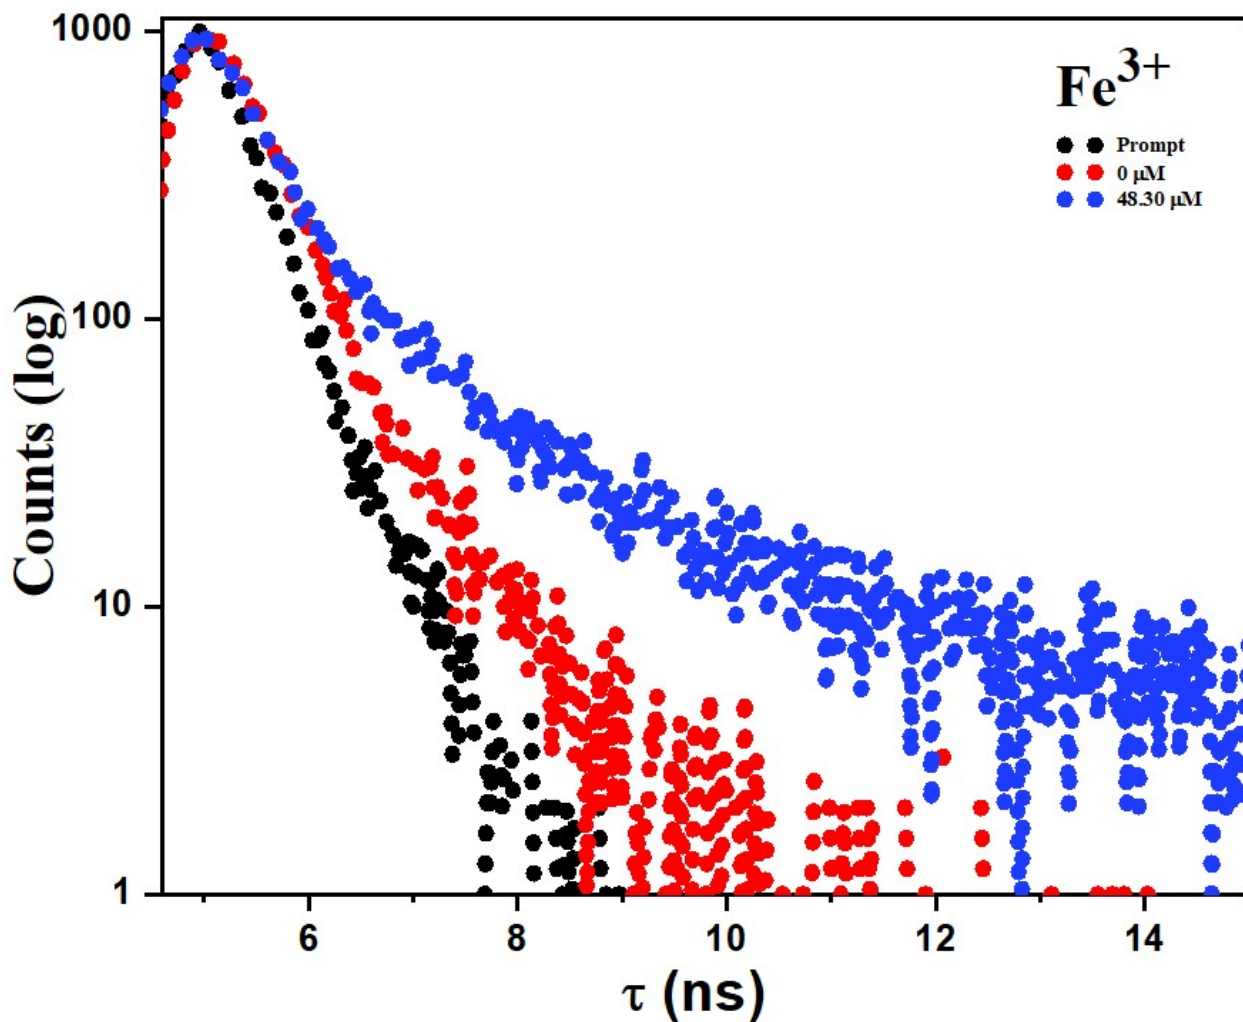

**Fig. S37:** Luminescence lifetime decay profile of compound **1** before and after the addition of the  $\text{Fe}^{3+}$  ions. The final concentration of  $\text{Fe}^{3+}$  ions in the medium is indicated in the legend. The instrument response function (prompt) is also shown. Here,  $\lambda_{\text{ex}} = 300$  nm and  $\lambda_{\text{em}} = 398$  nm were set during the experiment.

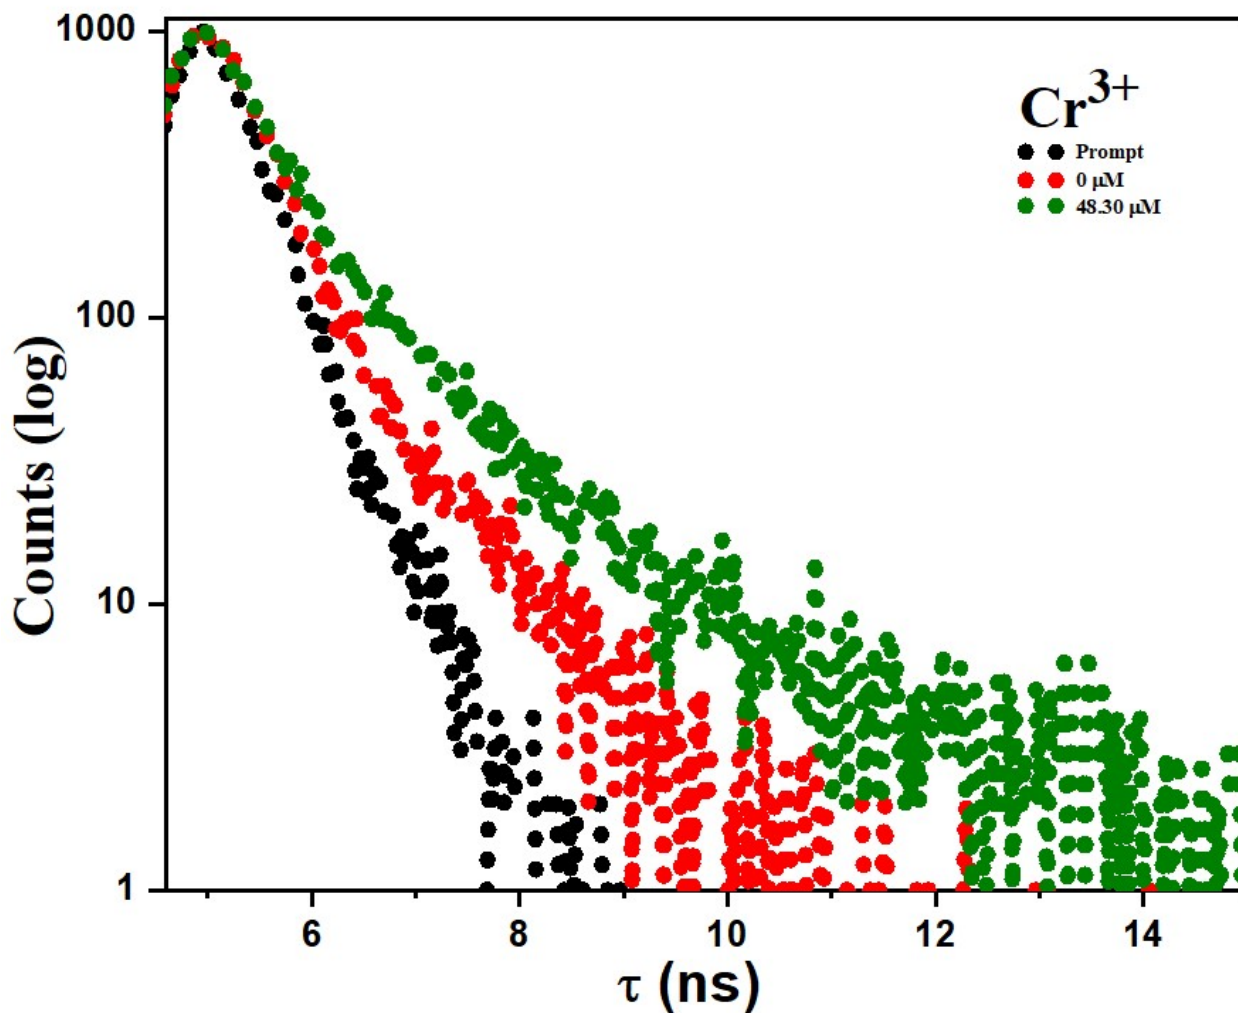

**Fig. S38:** Luminescence lifetime decay profile of compound **1** before and after the addition of the  $\text{Cr}^{3+}$  ions. The final concentration of  $\text{Cr}^{3+}$  ions in the medium is indicated in the legend. The instrument response function (prompt) is also shown. Here,  $\lambda_{\text{ex}} = 300 \text{ nm}$  and  $\lambda_{\text{em}} = 398 \text{ nm}$  were set during the experiment.



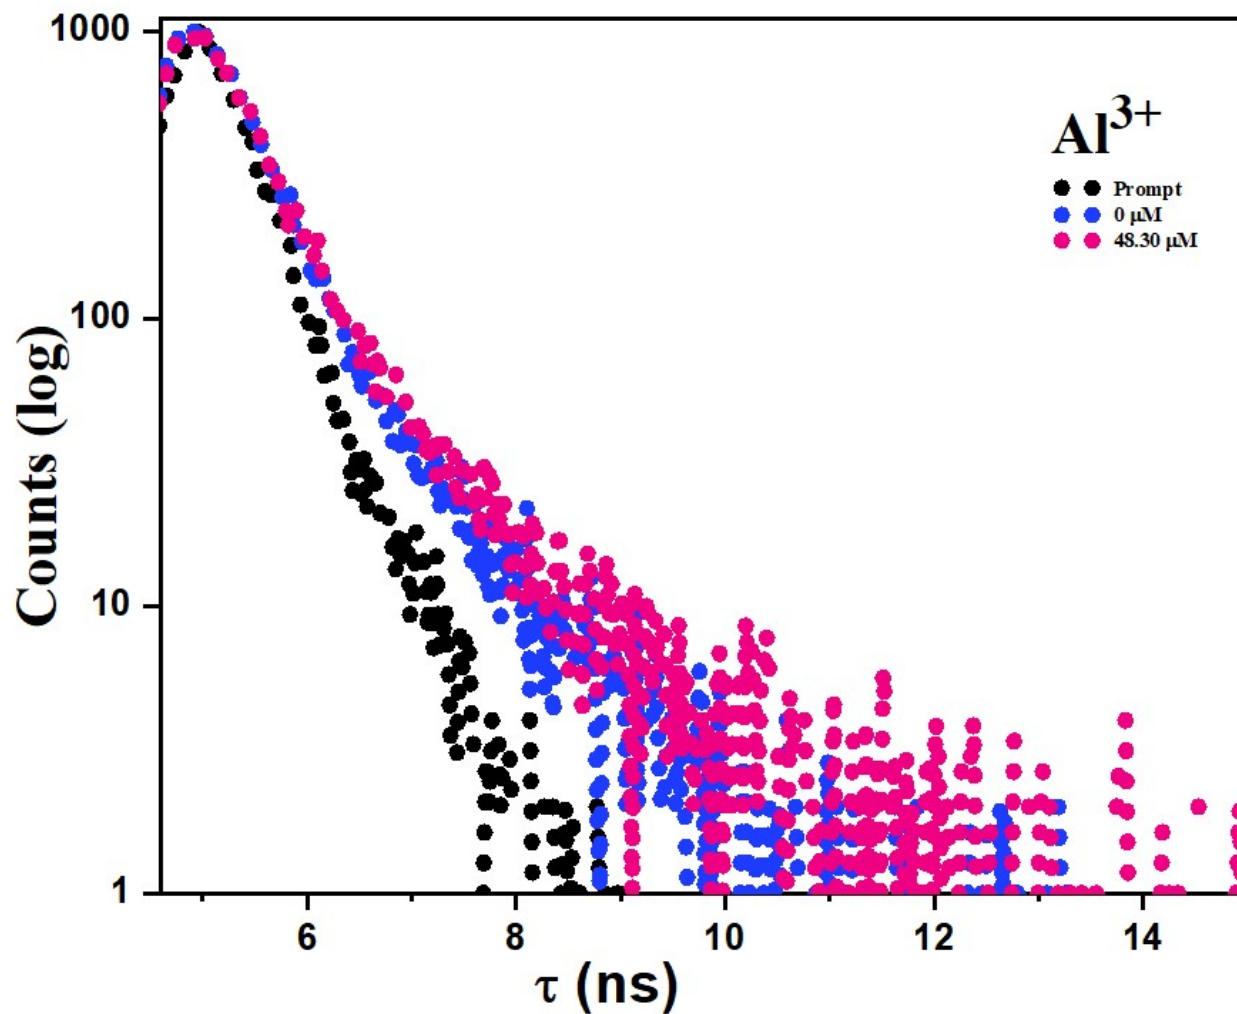

**Fig. S39:** Luminescence lifetime decay profile of compound **1** before and after the addition of the  $\text{Al}^{3+}$  ions. The final concentration of  $\text{Al}^{3+}$  ions in the medium is indicated in the legend. The instrument response function (prompt) is also shown. Here,  $\lambda_{\text{ex}} = 300$  nm and  $\lambda_{\text{em}} = 398$  nm were set during the experiment.

**Table S5:** Details about the time-resolved luminescence decays of compound **1** ( $\lambda_{\text{ex}} = 300$  nm and  $\lambda_{\text{em}} = 398$  nm) in presence of  $\text{Fe}^{3+}$ ,  $\text{Cr}^{3+}$ ,  $\text{Al}^{3+}$  solution.

| Metal ions       | Concentration<br>( $\mu\text{M}$ ) | Lifetime (ns) |        |                               |                   |
|------------------|------------------------------------|---------------|--------|-------------------------------|-------------------|
|                  |                                    | $T_1$         | $T_2$  | $T_{\text{av}} = (T_1+T_2)/2$ | $\tau(\text{ns})$ |
| $\text{Fe}^{3+}$ | 0                                  | 0.2030        | 0      | 0.101                         | 0.203             |
|                  | 48.30                              | 0.1479        | 1.2854 | 0.716                         | 0.344             |
| $\text{Cr}^{3+}$ | 0                                  | 0.2321        | 0      | 0.116                         | 0.232             |
|                  | 48.30                              | 0.1590        | 1.3480 | 0.753                         | 0.490             |
| $\text{Al}^{3+}$ | 0                                  | 0.2415        | 0      | 0.120                         | 0.241             |
|                  | 48.30                              | 0.1322        | 1.0551 | 0.593                         | 0.301             |



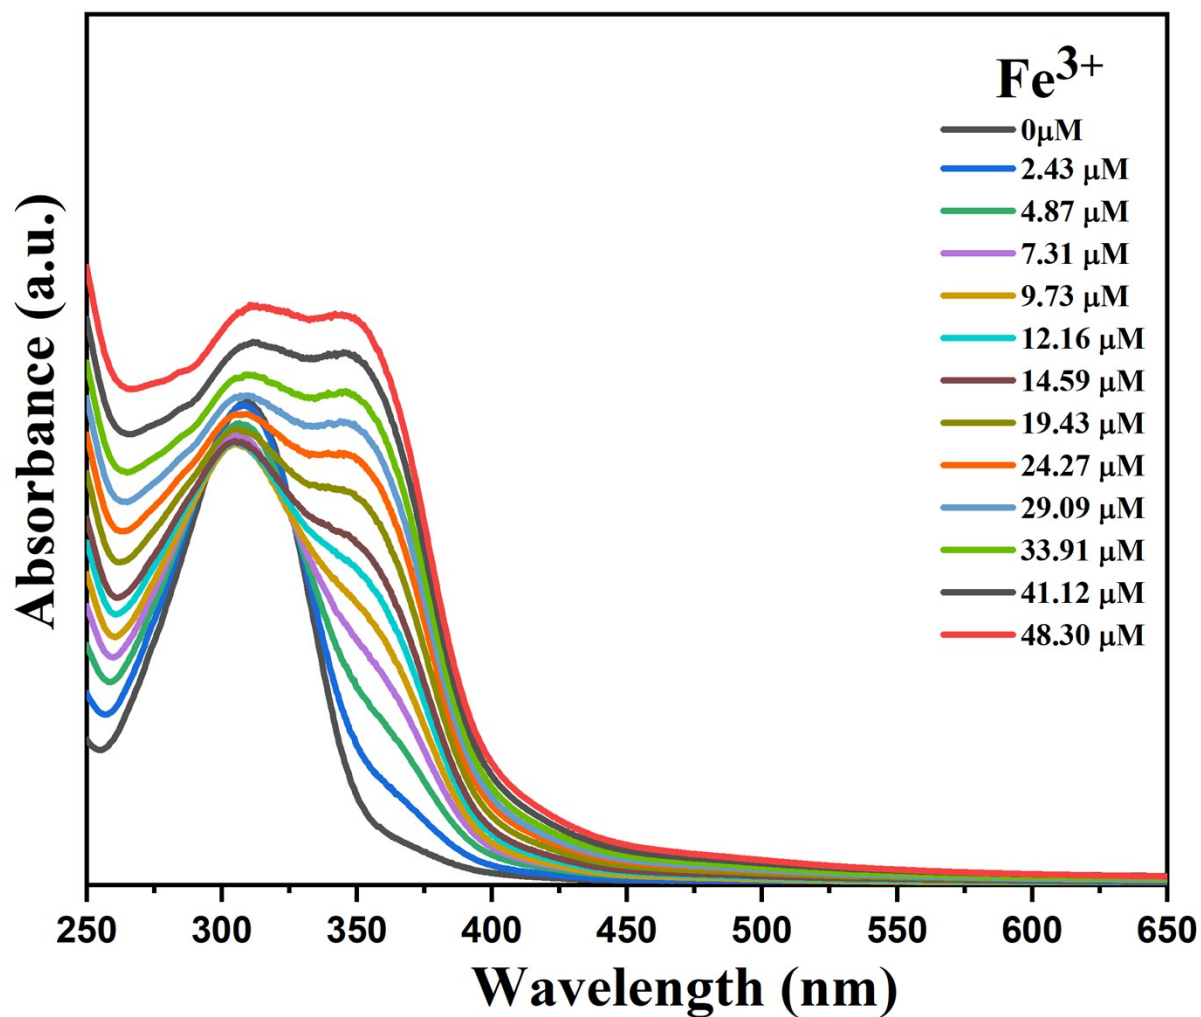

**Fig. S40:** Absorption spectra of **1** dispersed in water upon incremental addition of water solution of Fe<sup>3+</sup> ions. Final concentration of Fe<sup>3+</sup> ions in the medium is indicated in the legend.

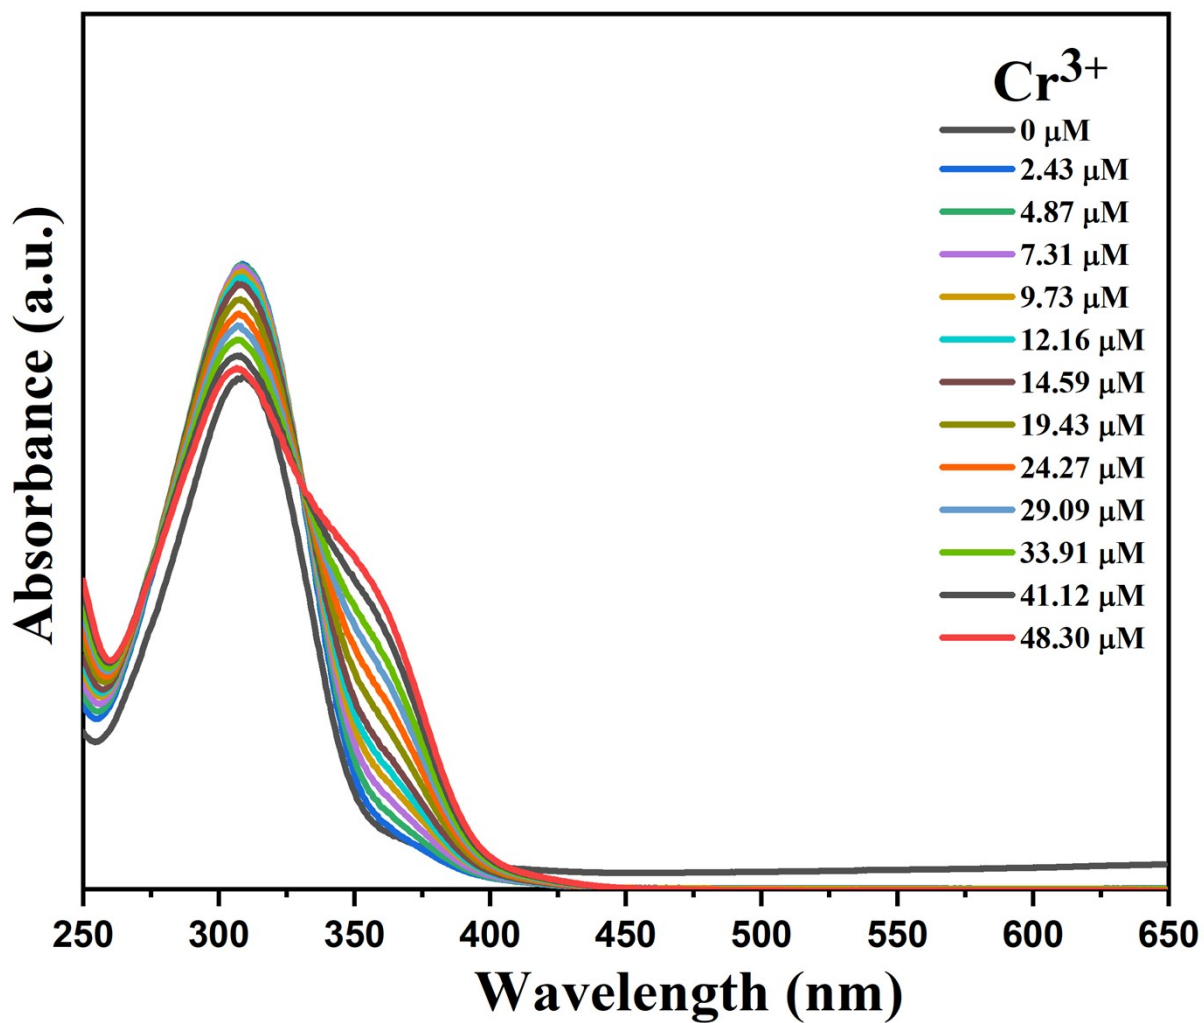

**Fig. S41:** Absorption spectra of **1** dispersed in water upon incremental addition of water solution of Cr<sup>3+</sup> ions. Final concentration of Cr<sup>3+</sup> ions in the medium is indicated in the legend.

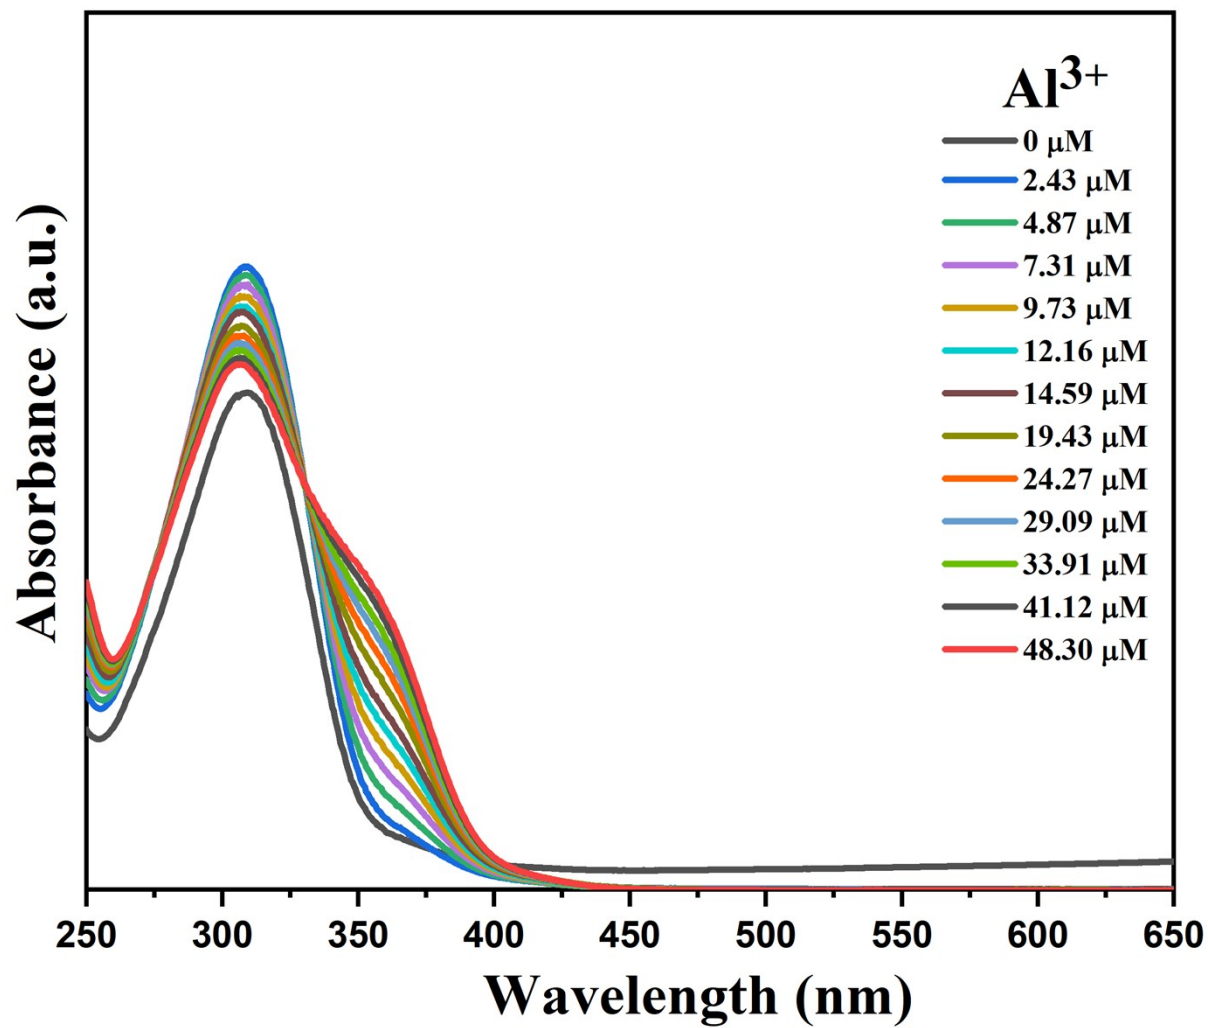

**Fig. S42:** Absorption spectra of **1** dispersed in water upon incremental addition of water solution of Al<sup>3+</sup> ions. Final concentration of Al<sup>3+</sup> ions in the medium is indicated in the legend.

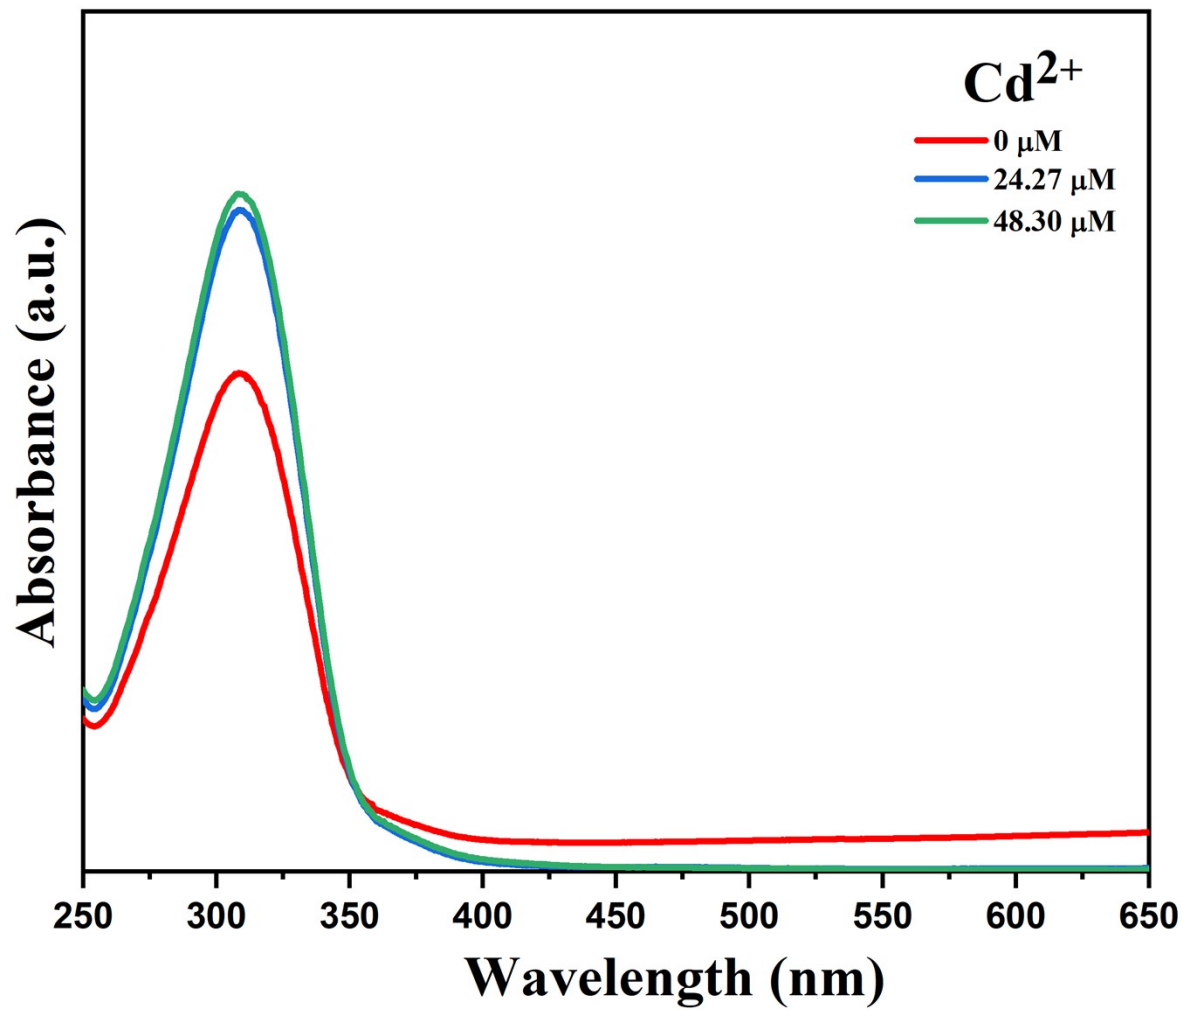

**Fig. S43:** Absorption spectra of **1** dispersed in water upon incremental addition of water solution of Cd<sup>2+</sup> ions. Final concentration of Cd<sup>2+</sup> ions in the medium is indicated in the legend.

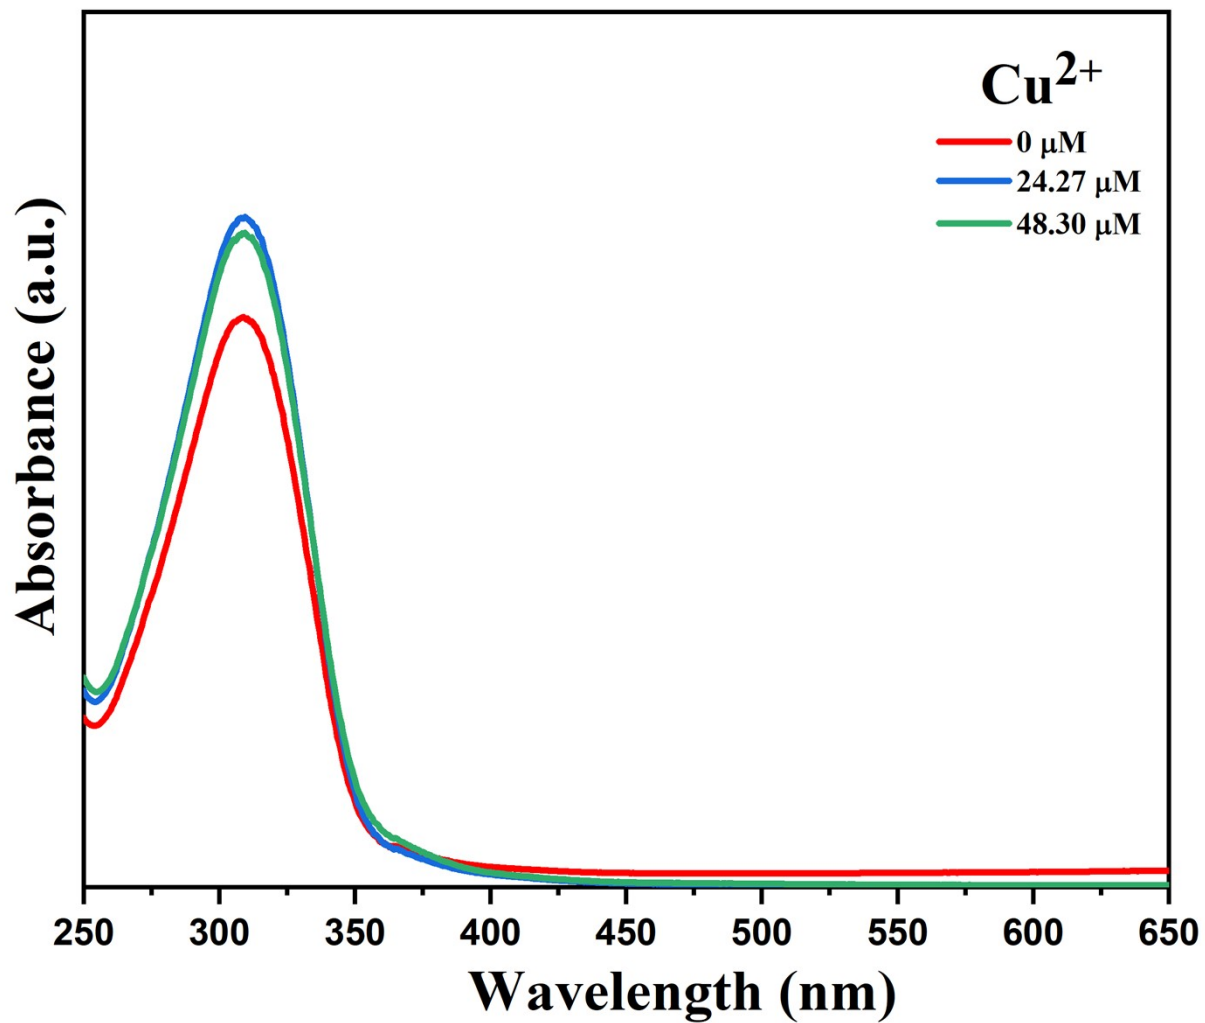

**Fig. S44:** Absorption spectra of 1 dispersed in water upon incremental addition of water solution of Cu<sup>2+</sup> ions. Final concentration of Cu<sup>2+</sup> ions in the medium is indicated in the legend.

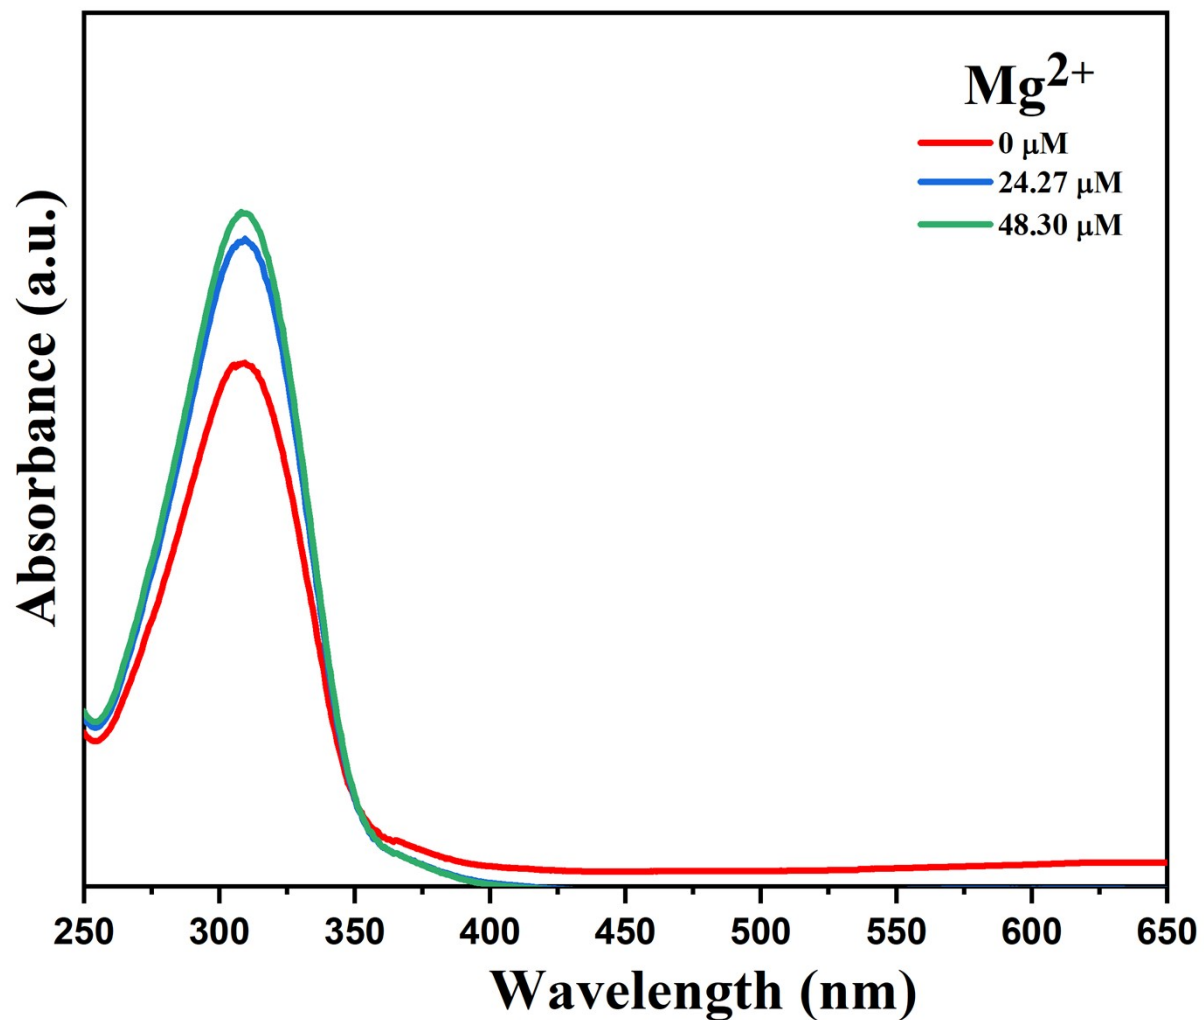

**Fig. S45:** Absorption spectra of **1** dispersed in water upon incremental addition of water solution of Mg<sup>2+</sup> ions. Final concentration of Mg<sup>2+</sup> ions in the medium is indicated in the legend.

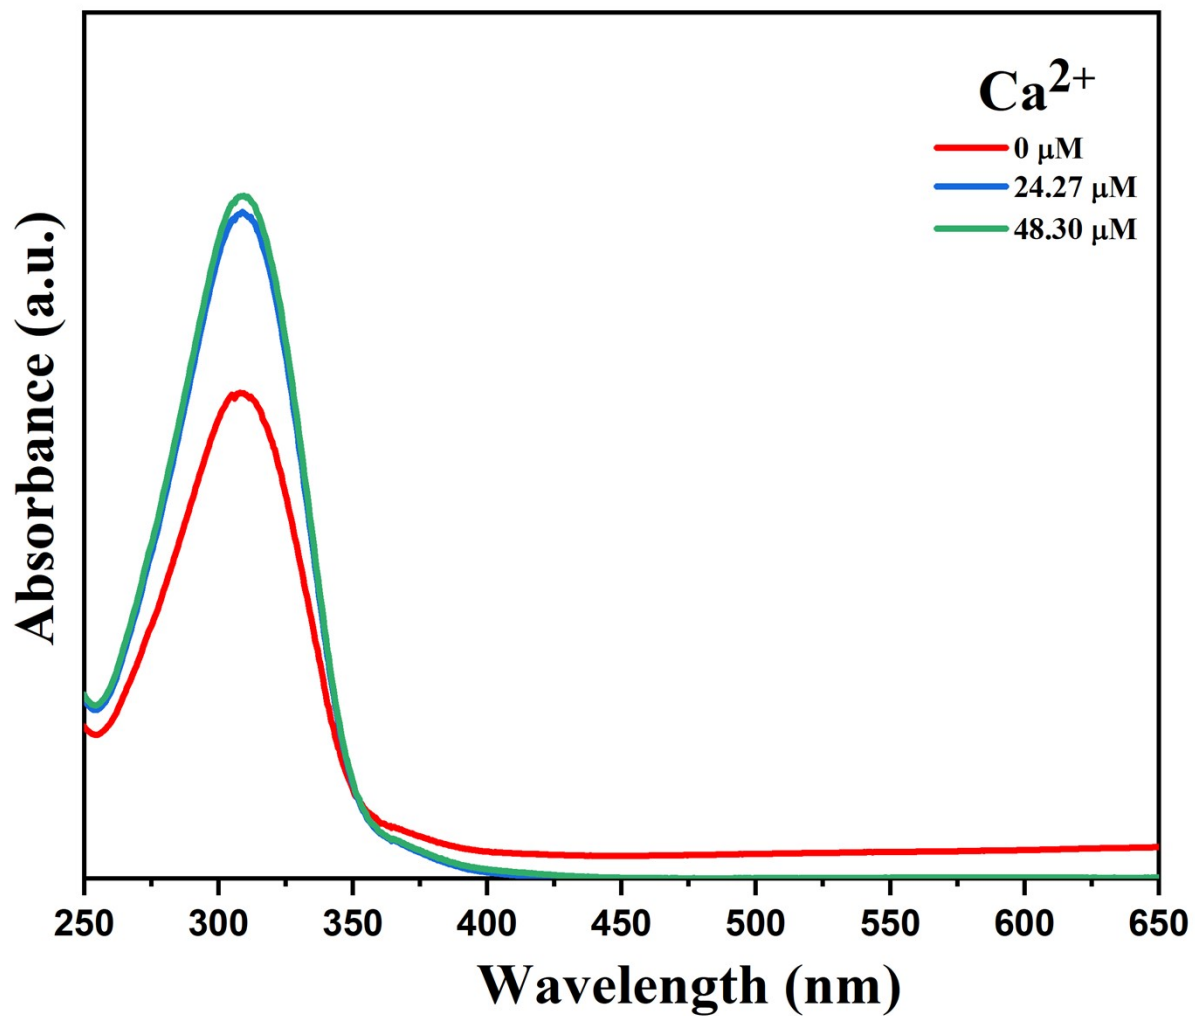

**Fig. S46:** Absorption spectra of **1** dispersed in water upon incremental addition of water solution of Ca<sup>2+</sup> ions. Final concentration of Ca<sup>2+</sup> ions in the medium is indicated in the legend.

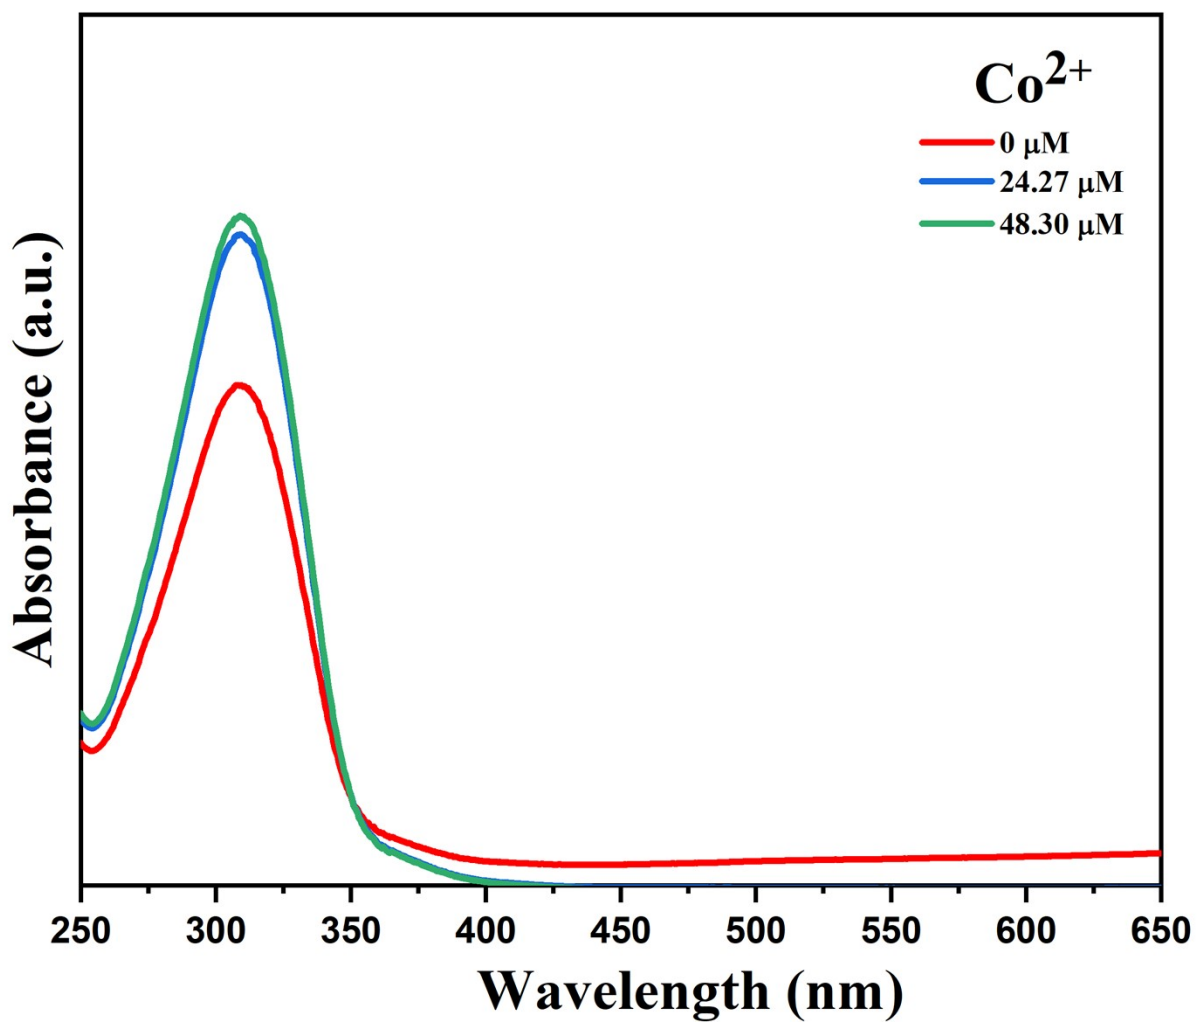

**Fig. S47:** Absorption spectra of **1** dispersed in water upon incremental addition of water solution of  $\text{Co}^{2+}$  ions. Final concentration of  $\text{Co}^{2+}$  ions in the medium is indicated in the legend.



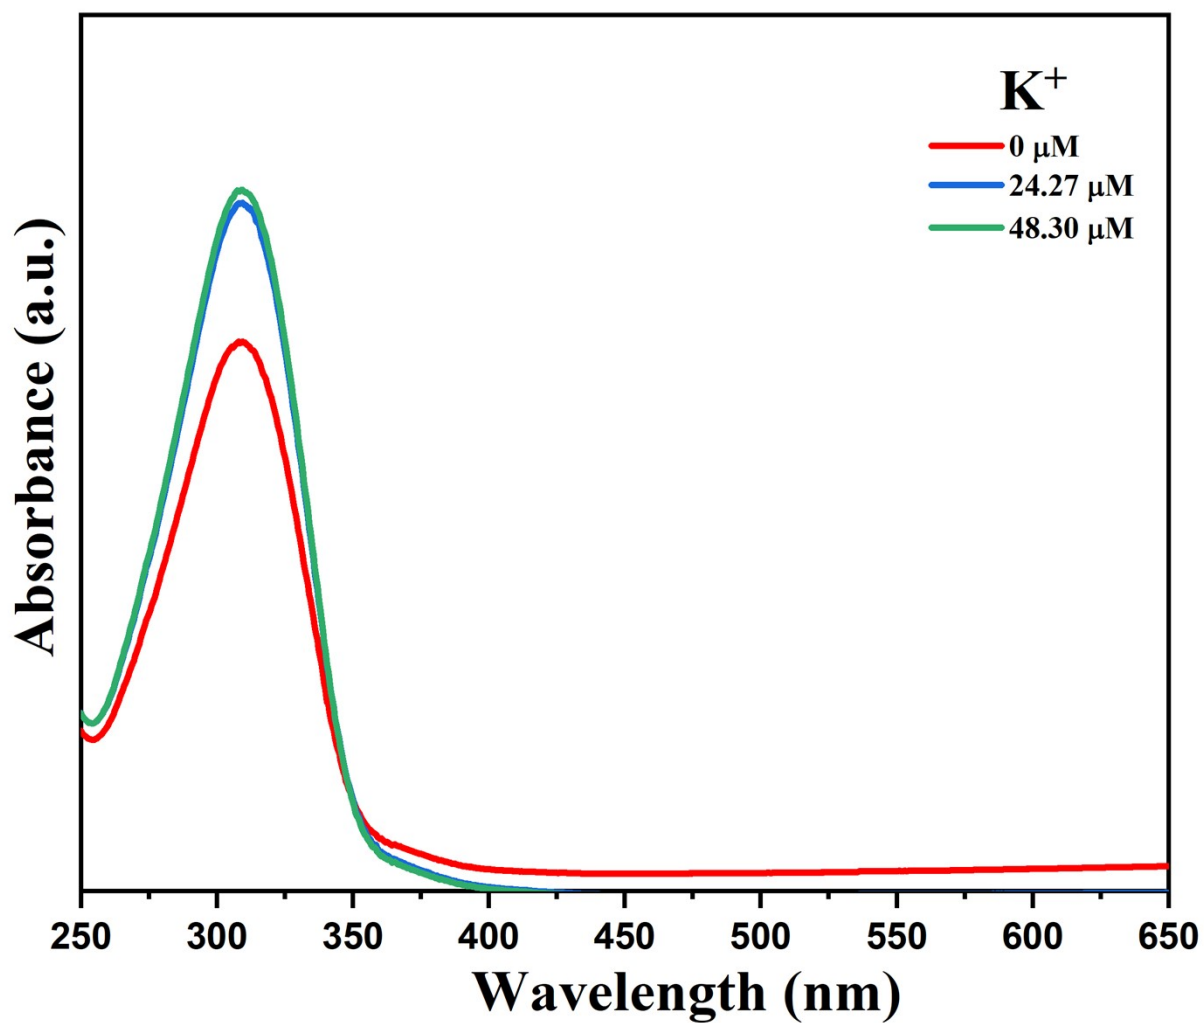

**Fig. S48:** Absorption spectra of **1** dispersed in water upon incremental addition of water solution of K<sup>+</sup> ions. Final concentration of K<sup>+</sup> ions in the medium is indicated in the legend.

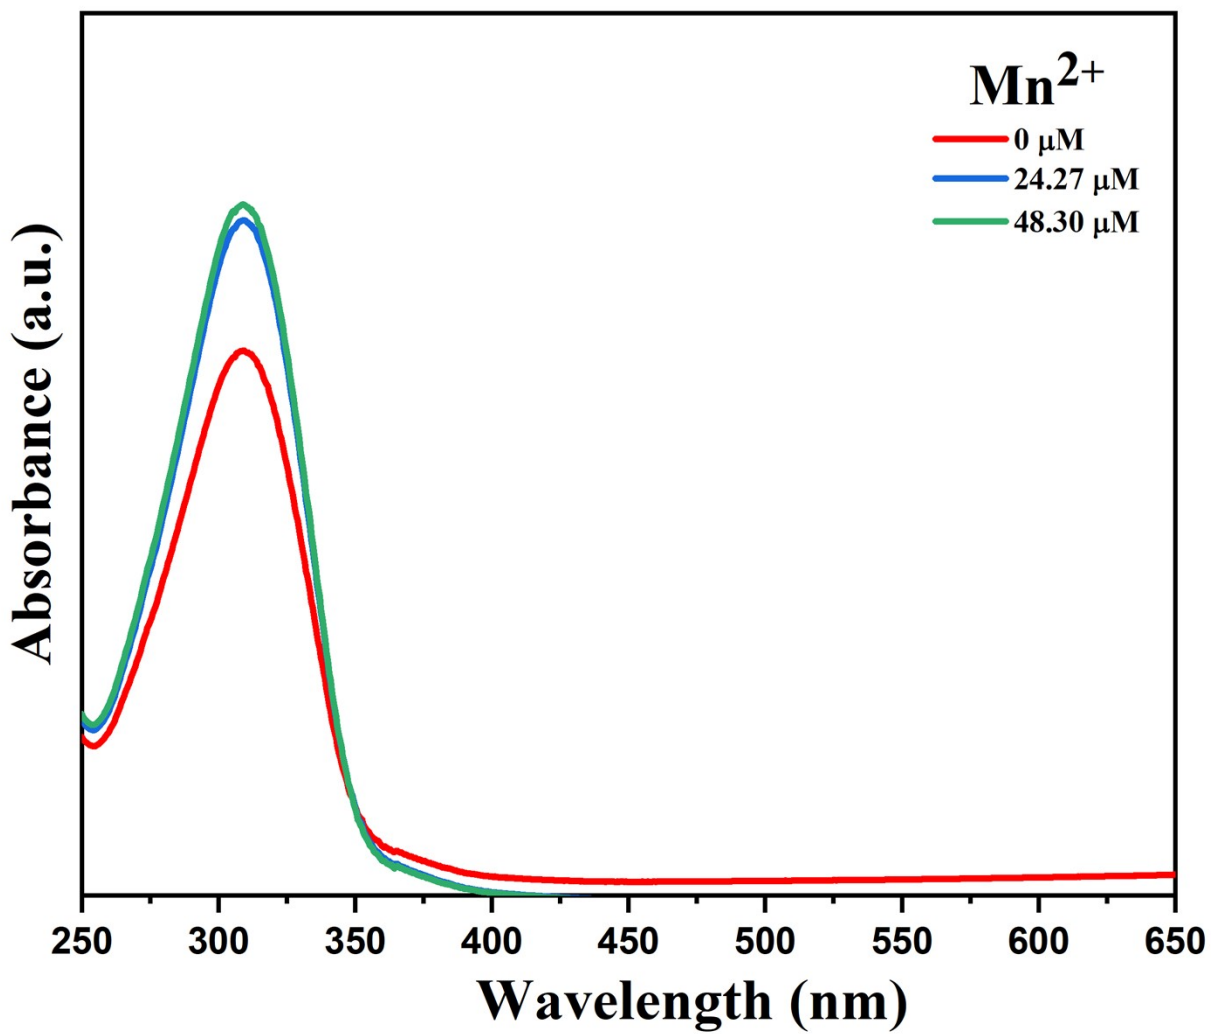

**Fig. S49:** Absorption spectra of **1** dispersed in water upon incremental addition of water solution of Mn<sup>2+</sup> ions. Final concentration of Mn<sup>2+</sup> ions in the medium is indicated in the legend.

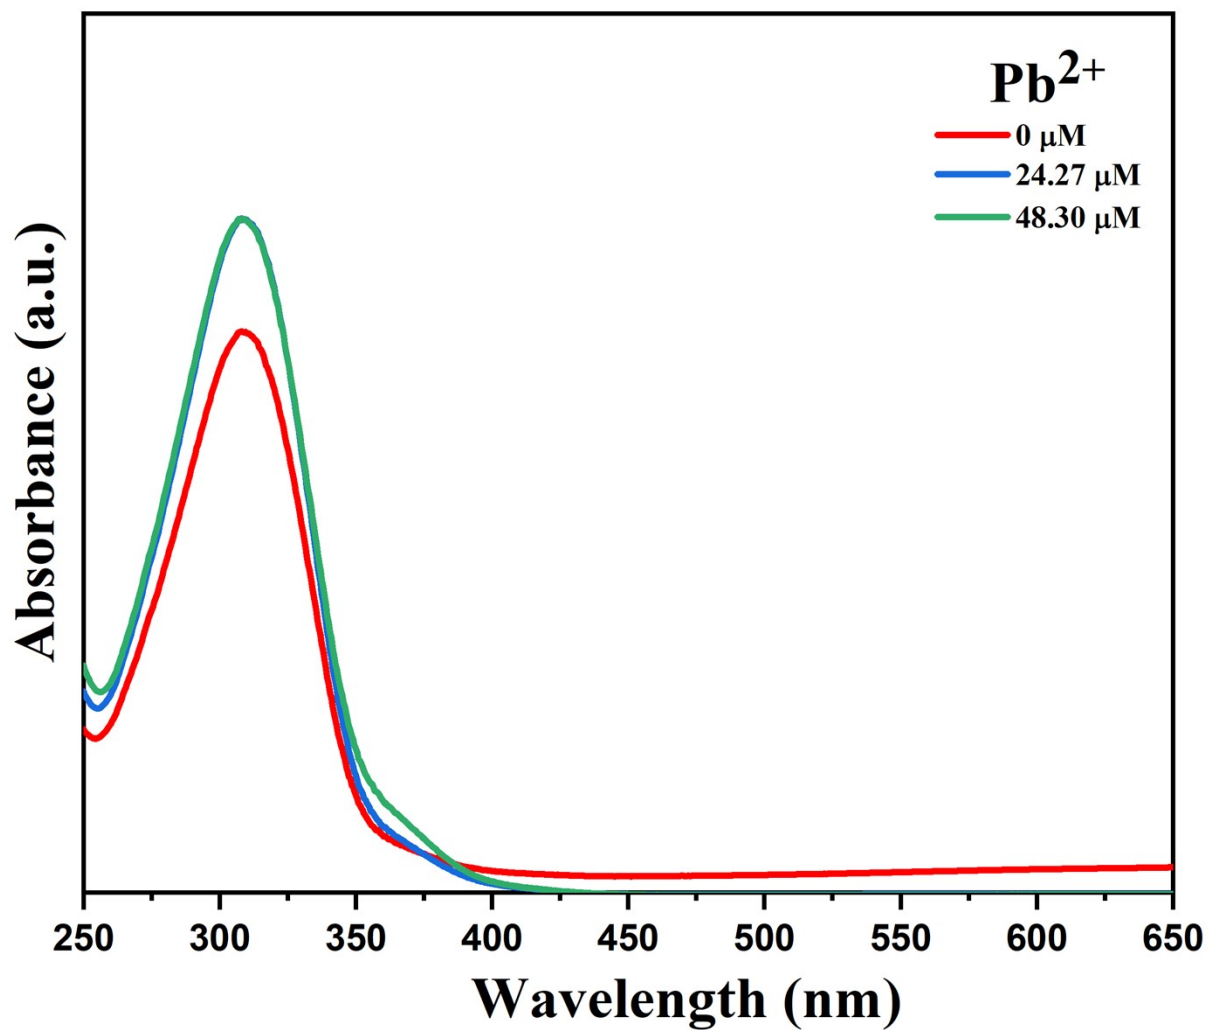

**Fig. S50:** Absorption spectra of 1 dispersed in water upon incremental addition of water solution of  $\text{Pb}^{2+}$  ions. Final concentration of  $\text{Pb}^{2+}$  ions in the medium is indicated in the legend.

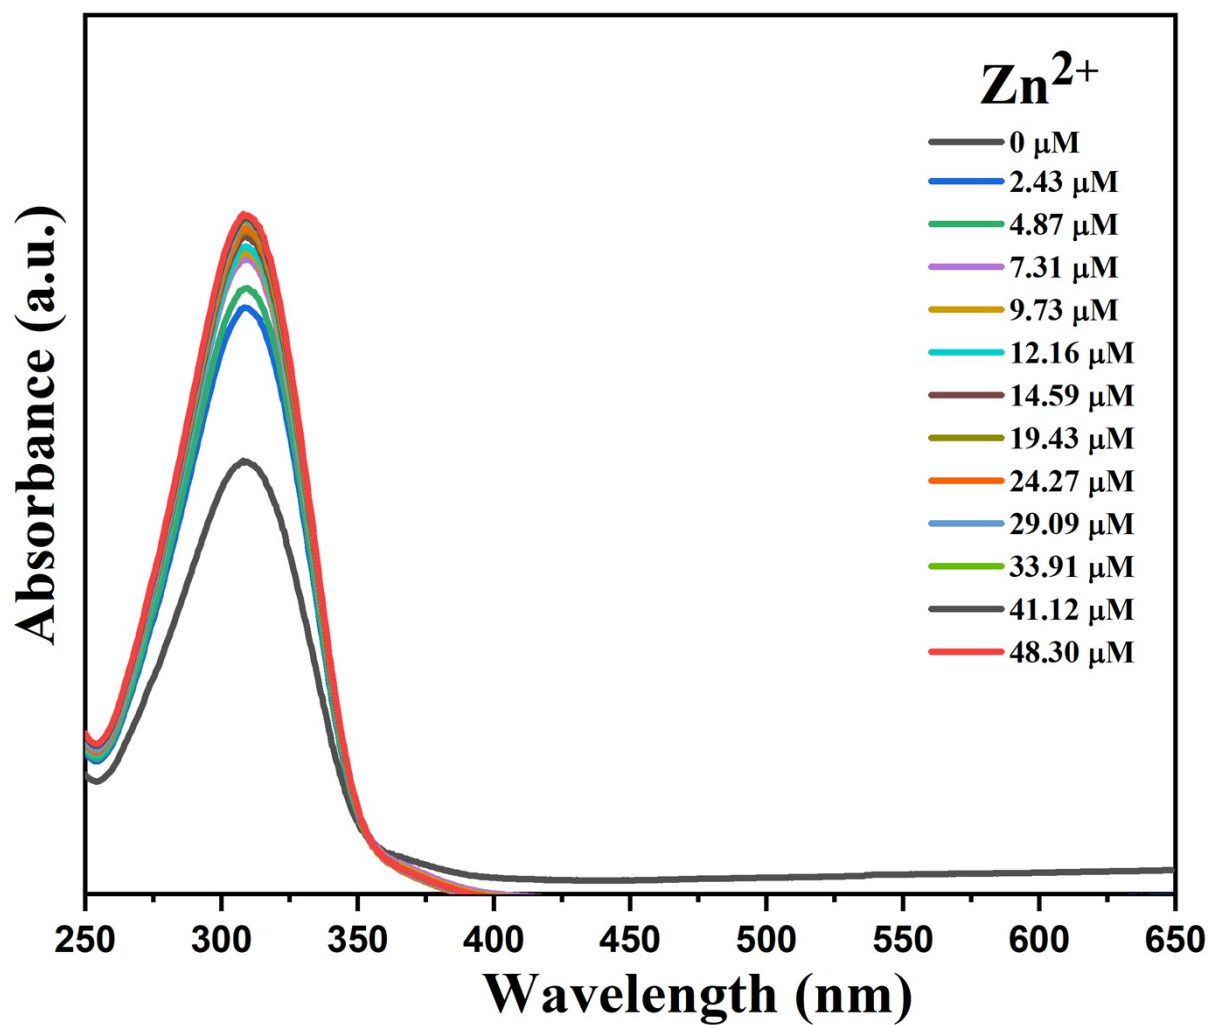

Fig. S51: Absorption spectra of 1 dispersed in water upon incremental addition of water solution of Zn<sup>2+</sup> ions. Final concentration of Zn<sup>2+</sup> ions in the medium is indicated in the legend.

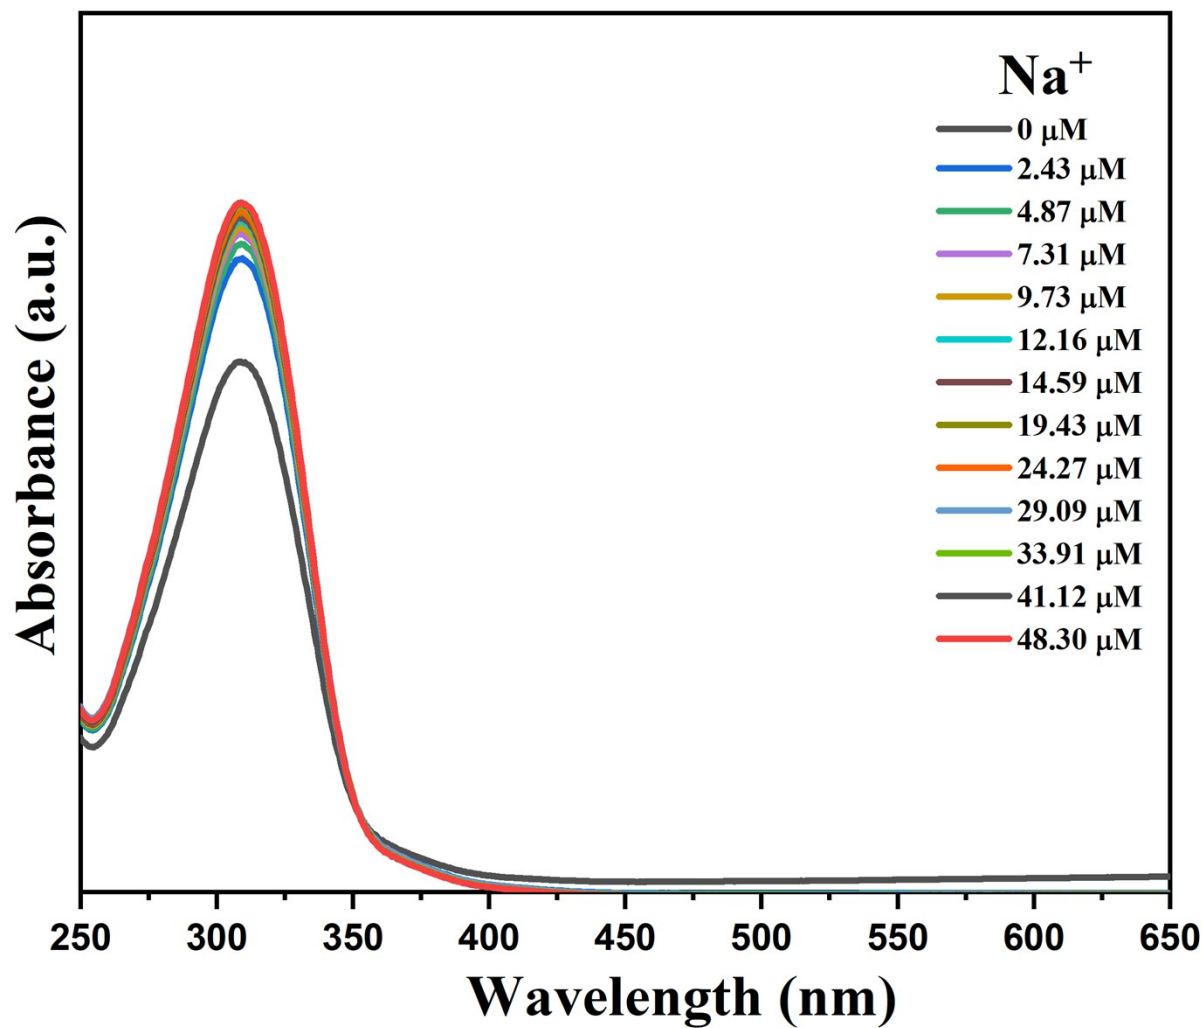

**Fig. S52:** Absorption spectra of 1 dispersed in water upon incremental addition of water solution of Na<sup>+</sup> ions. Final concentration of Na<sup>+</sup> ions in the medium is indicated in the legend.

**Table S6:** A summary of luminescence-based sensing of Fe<sup>3+</sup> ion using MOFs.

| MOF                                                                                                      | Medium           | LOD ( $\mu\text{M}$ )     | $K_{\text{sv}}$ ( $\text{M}^{-1}$ )           | Ref.      |
|----------------------------------------------------------------------------------------------------------|------------------|---------------------------|-----------------------------------------------|-----------|
| $\{[\text{Cd}_2(\text{SA})_2(\text{L})_2] \cdot \text{H}_2\text{O}\}_n$                                  | DMF              | 2.4                       | $2.1 \times 10^4$                             | 89        |
| $[\text{Cd}_2(\text{OBA})_2(\text{BPTP})(\text{H}_2\text{O})]$                                           | DMF              | 0.36                      | —                                             | 90        |
| $[\text{Zn}(5\text{-AIP})(\text{Ald-4})] \cdot \text{H}_2\text{O}$                                       | H <sub>2</sub> O | 0.30                      | $9.00 \times 10^4$                            | 91.       |
| $[\text{Zn}(\text{L})(\text{bpdc})] \cdot 1.6\text{H}_2\text{O}$                                         | DMF              | 5.62                      | $1.73 \times 10^4$                            | 92        |
| $[\text{Cd}(\text{H}_2\text{BDDBA})]_n$                                                                  | H <sub>2</sub> O | —                         | $8.79 \times 10^4$                            | 93        |
| $[\text{Cd}(\text{PAM})(4\text{-bpdb})_{1.5}] \cdot \text{DMF}$                                          | H <sub>2</sub> O | 0.3                       | $3.5 \times 10^4$                             | 94        |
| $[\text{Cu}(\text{tpp}) \cdot \text{H}_2\text{O}]_{2n}$                                                  | H <sub>2</sub> O | 10                        | $4.6 \times 10^4$                             | 95        |
| $\{[\text{Cd}_3(\text{L}^{2-})_3(\text{H}_2\text{O})] \cdot (\text{DMF}) \cdot (\text{H}_2\text{O})\}_n$ | DMF              | —                         | $2.07 \times 10^4$                            | 96        |
| $[\text{Zn}_2(\text{oba})_2(\text{bpy})]$                                                                | MeOH             | 0.3                       | $5.8 \times 10^4$                             | 97        |
| Ag-MOFs(1–3)                                                                                             | H <sub>2</sub> O | 11.46,<br>15.83,<br>15.44 | (0.936,<br>1.033, and<br>$0.888) \times 10^4$ | 98        |
| JXUST-18                                                                                                 | EtOH             | 0.196                     | —                                             | 99        |
| $[\text{Cd}(\text{PDA})(\text{L})_2]$                                                                    | H <sub>2</sub> O | 1.34                      | $23.29 \times 10^4$                           | This work |

**Table S7:** A summary of luminescence-based sensing of Cr<sup>3+</sup> ions using MOFs.

| MOF                                                                                                                         | Medium           | LOD<br>( $\mu\text{M}$ ) | $K_{sv}$ ( $\text{M}^{-1}$ ) | Ref.      |
|-----------------------------------------------------------------------------------------------------------------------------|------------------|--------------------------|------------------------------|-----------|
| [Zn (tbda)] <sub>n</sub>                                                                                                    | H <sub>2</sub> O | 180                      | $2.68 \times 10^3$           | 100       |
| [Eu <sub>2</sub> (tpbpc) <sub>4</sub> ·CO <sub>3</sub> ·4H <sub>2</sub> O]·DMF·solvent                                      | H <sub>2</sub> O | 68.8                     | $5.14 \times 10^2$           | 101       |
| {[Zn(H <sub>2</sub> dhbdc)(bpycz)]·0.5H <sub>2</sub> O} <sub>n</sub>                                                        | H <sub>2</sub> O | 8.22                     | $4.85 \times 10^3$           | 102       |
| [Zn(Br-1,4-bdc) (bpycz)] <sub>n</sub>                                                                                       | H <sub>2</sub> O | 4.73                     | $4.04 \times 10^3$           | 102       |
| {[Zn(tta) <sub>0.5</sub> (m-bimb)]·H <sub>2</sub> O} <sub>n</sub>                                                           | DMF              | —                        | 0.65                         | 103       |
| [Zn <sub>2</sub> (TPOM)(NH <sub>2</sub> -BDC) <sub>2</sub> ]·4H <sub>2</sub> O                                              | DMF              | 4.9                      | —                            | 52        |
| [Zn(L)(H <sub>2</sub> O)]·H <sub>2</sub> O                                                                                  | H <sub>2</sub> O | 2.44                     | $2.03 \times 10^4$           | 104       |
| [Zn(5-AIP)(Ald-4)]·H <sub>2</sub> O                                                                                         | H <sub>2</sub> O | 0.46                     | $2.30 \times 10^4$           | 91        |
| {[Zn(BIBT)(oba)]·DMA} <sub>n</sub>                                                                                          | EtOH             | 0.049                    | —                            | 105       |
| [Me <sub>2</sub> NH <sub>2</sub> ] <sub>4</sub> [Zn <sub>6</sub> (qptc) <sub>3</sub> (trz) <sub>4</sub> ]·6H <sub>2</sub> O | H <sub>2</sub> O | 1                        | $4.39 \times 10^4$           | 106       |
| Zn <sub>3</sub> (bpdc) <sub>2</sub> (pdc)(DMF)·6DMF                                                                         | DMF              | 25.1                     | 3870                         | 107       |
| [Cd(PDA)(L) <sub>2</sub> ]                                                                                                  | H <sub>2</sub> O | 4.95                     | $5.06 \times 10^4$           | This work |

**Table S8:** A summary of luminescence-based sensing of Al<sup>3+</sup> ions using MOFs.

| MOF                                                                                                                                        | Medium           | LOD ( $\mu\text{M}$ ) | K <sub>sv</sub> ( $\text{M}^{-1}$ ) | Ref.      |
|--------------------------------------------------------------------------------------------------------------------------------------------|------------------|-----------------------|-------------------------------------|-----------|
| $\{[\text{Zn}_2(\text{O-BTC})(4,4'\text{-BPY})_{0.5}(\text{H}_2\text{O})_3] \cdot (\text{H}_2\text{O})_{1.5} \cdot (\text{DMA})_{0.5}\}_n$ | EtOH             | 3.70                  | —                                   | 59        |
| $[\text{Zn}(\text{DMA})(\text{TBA})]$                                                                                                      | H <sub>2</sub> O | 1.97                  | $1.33 \times 10^4$                  | 108       |
| $[\text{Co}_2(\text{dmimpym})(\text{nda})_2]_n$                                                                                            | DMF              | 0.7                   | —                                   | 109       |
| $\{[\text{Cd}(\text{CDC})(\text{L})]\}_n$                                                                                                  | DMF              | 61                    | $2.6 \times 10^3$                   | 89        |
| $[\text{Cd}(\text{L})(\text{phen})_2] \cdot 5\text{H}_2\text{O}$                                                                           | DMF              | 0.113                 | $2.49 \times 10^4$                  | 110       |
| HPU-24@Ru                                                                                                                                  | H <sub>2</sub> O | 11.63                 | —                                   | 111       |
| $\{[\text{Co}(\text{L})(\text{bibp})]\}_n$                                                                                                 | H <sub>2</sub> O | 1.52                  | $1.97 \times 10^4$                  | 112       |
| $[\text{Zn}(5\text{-AIP})(\text{Ald-4})] \cdot \text{H}_2\text{O}$                                                                         | H <sub>2</sub> O | 0.35                  | $2.80 \times 10^4$                  | 91        |
| $[\text{Cd}(\text{PAM})(4\text{-bpdb})_{1.5}] \cdot \text{DMF}$                                                                            | H <sub>2</sub> O | 0.56                  | $2.3 \times 10^4$                   | 113       |
| $\{[\text{Cd}_2(\text{SA})_2(\text{L})_2] \cdot \text{H}_2\text{O}\}_n$                                                                    | DMF              | 93                    | $5.4 \times 10^3$                   | 89        |
| $[\text{Co}(\text{OBA})(\text{DATZ})_{0.5}(\text{H}_2\text{O})]$                                                                           | H <sub>2</sub> O | 2.5                   | —                                   | 114       |
| $[\text{Cd}(\text{PDA})(\text{L})_2]$                                                                                                      | H <sub>2</sub> O | 3.96                  | $3.09 \times 10^4$                  | This work |



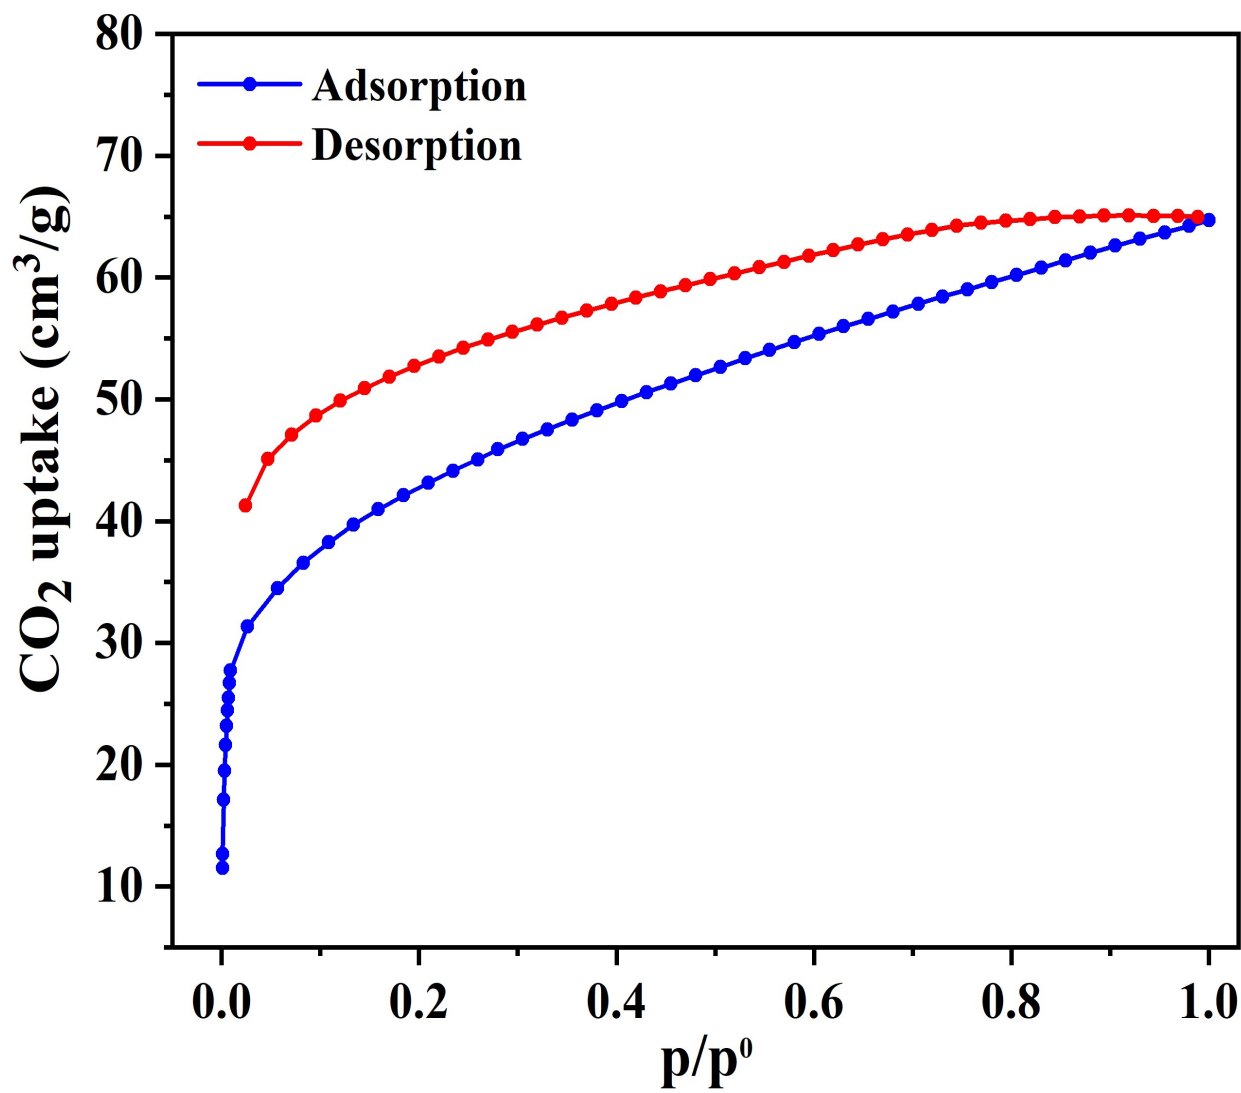

Fig. S53: CO<sub>2</sub> gas sorption isotherm of 1 at 195 K.

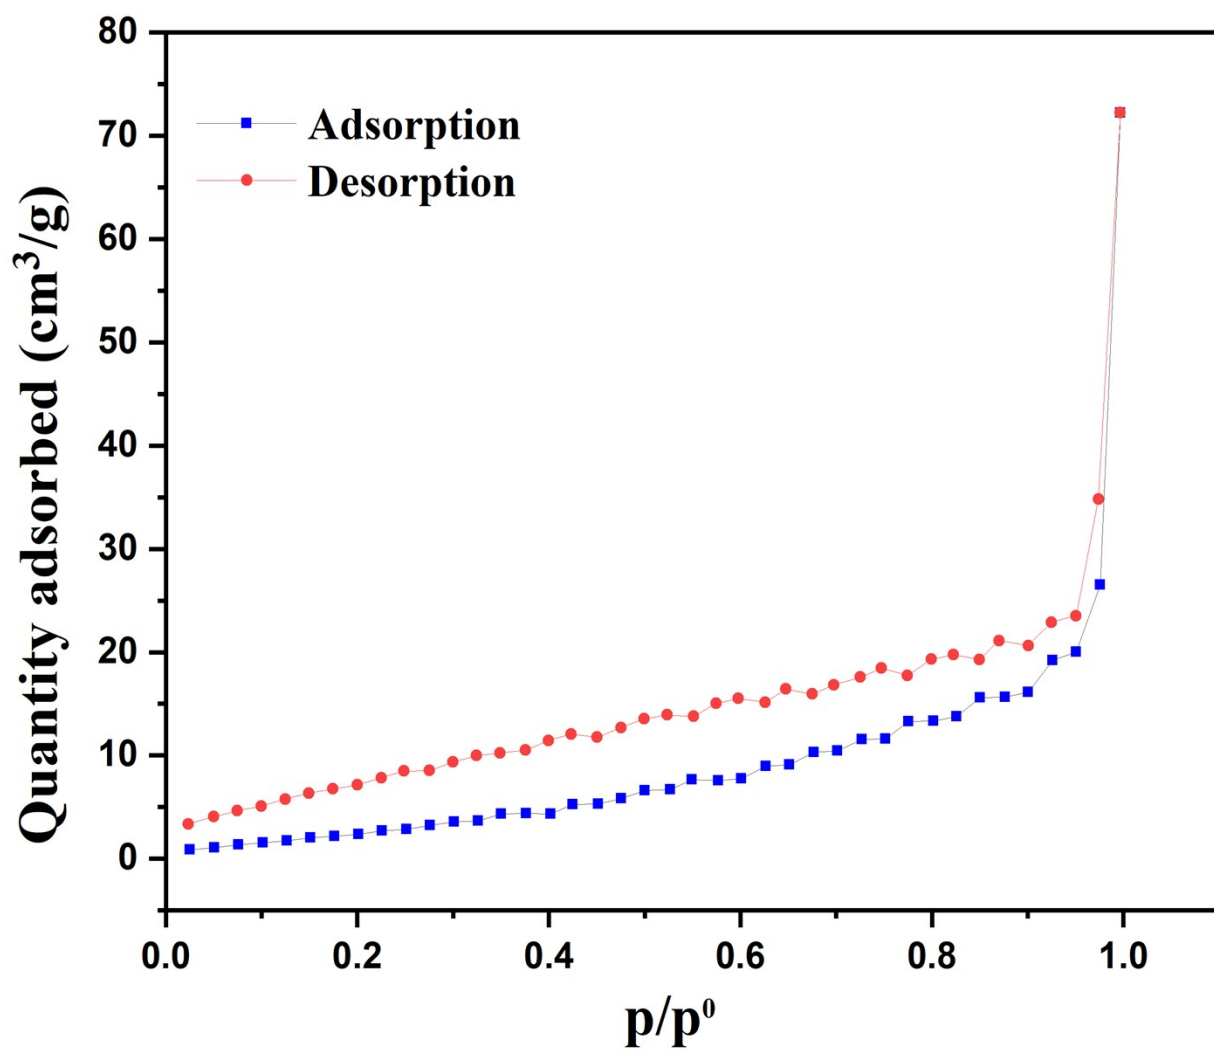

Fig. S54: N<sub>2</sub> gas sorption isotherm of 1 at 77 K.

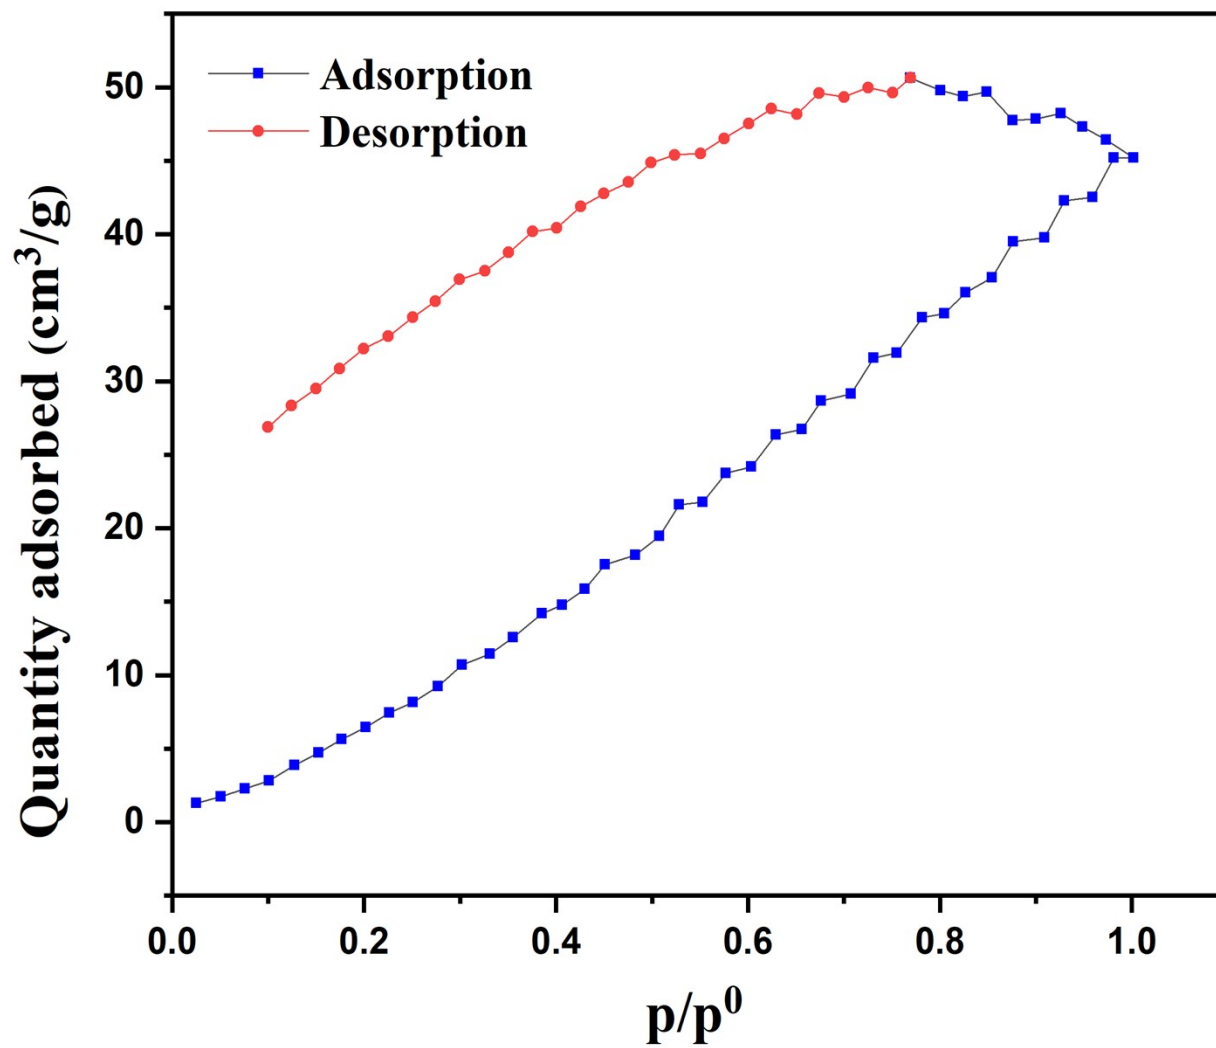

Fig. S55: H<sub>2</sub> gas sorption isotherm of **1** at 77 K.

**Table S9:** A summary of CO<sub>2</sub> gas adsorption using MOFs.

| MOFs                                                                                                                                                                      | Surface area from N <sub>2</sub> adsorption [m <sup>2</sup> g <sup>-1</sup> ] | CO <sub>2</sub> uptake cm <sup>3</sup> /g at 195 K | Ref.      |
|---------------------------------------------------------------------------------------------------------------------------------------------------------------------------|-------------------------------------------------------------------------------|----------------------------------------------------|-----------|
| $\{[\text{Cd}_2(\text{sdb})_2(4\text{-bpmh})_2(\text{H}_2\text{O})]\}_n \cdot 2n(\text{H}_2\text{O})$                                                                     | —                                                                             | 39.19                                              | 115       |
| $\{[\text{Cd}_2(\text{sdb})_2(3\text{-bpmh})_2]\}_n \cdot 3n(\text{H}_2\text{O}) \cdot n(\text{C}_6\text{H}_5\text{NO})$                                                  | —                                                                             | 60.9                                               | 115       |
| $[\text{Mg}_{16}(\text{PTCA})_8(\mu_2\text{-H}_2\text{O})_8(\text{H}_2\text{O})_{16}(\text{dioxane})_8] \cdot (\text{H}_2\text{O})_{13} \cdot (\text{DMF})_{26}$          | 438.1                                                                         | 160.5                                              | 116       |
| $\{[\text{Zn}(\text{H}_2\text{dhdcb})_2(\text{bpycz})] \cdot 0.5\text{H}_2\text{O}\}_n$                                                                                   | 291.4                                                                         | 101.1                                              | 102       |
| $[\text{Zn}(\text{Br-1,4-bdc})(\text{bpycz})]_n$                                                                                                                          | 288.5                                                                         | 98.6                                               | 102       |
| Cu-MOF                                                                                                                                                                    | 945                                                                           | 201.6                                              | 117       |
| $[\text{Cu}_3(3,3'\text{-dmglut})_3(\text{bte})] \cdot 6(\text{H}_2\text{O})\}_n$ and $[\text{Cu}(3,3'\text{-dmglut})(\text{btp})_{0.5}] \cdot 2(\text{H}_2\text{O})\}_n$ | —                                                                             | 21 and 26.2                                        | 118       |
| Cu-MOP                                                                                                                                                                    | 270.9                                                                         | 96.5                                               | 119       |
| ZnDatzBdc                                                                                                                                                                 | 303                                                                           | 92.5                                               | 120       |
| $[\text{Cd}(\text{PDA})(\text{L})_2]$                                                                                                                                     | 11.635                                                                        | 64.5                                               | This work |
